# Supplementary material for: Systematic analysis of lncRNA and microRNA dynamic features reveals diagnostic and prognostic biomarkers of myocardial infarction
Source: publisher site journal article supplement (doi:10.18632/aging.102667), 2020-01-12
Supplement: Supplementary file [file aging-v12i1-102667-supplementary-material-SD1.pdf]

**SUPPLEMENTARY FIGURES**

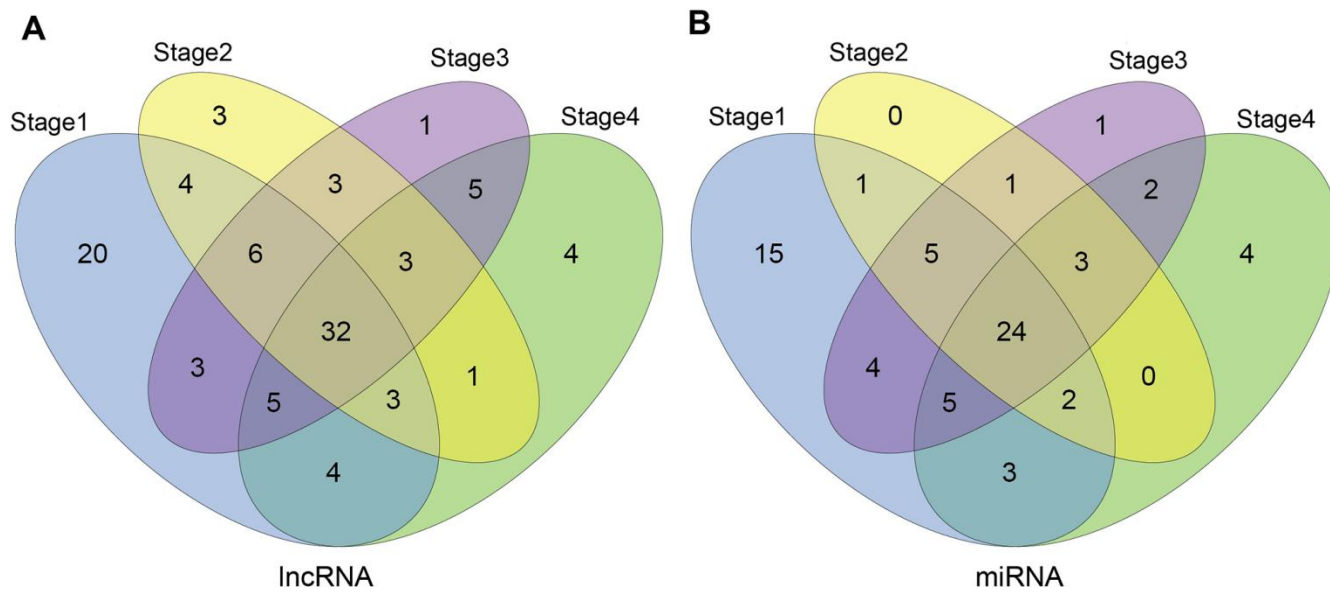

**Supplementary Figure 1.** Venn diagram of lncRNAs (A) and miRNAs (B) in dysregulated lmiRM-CTs at four stages during MI progression.

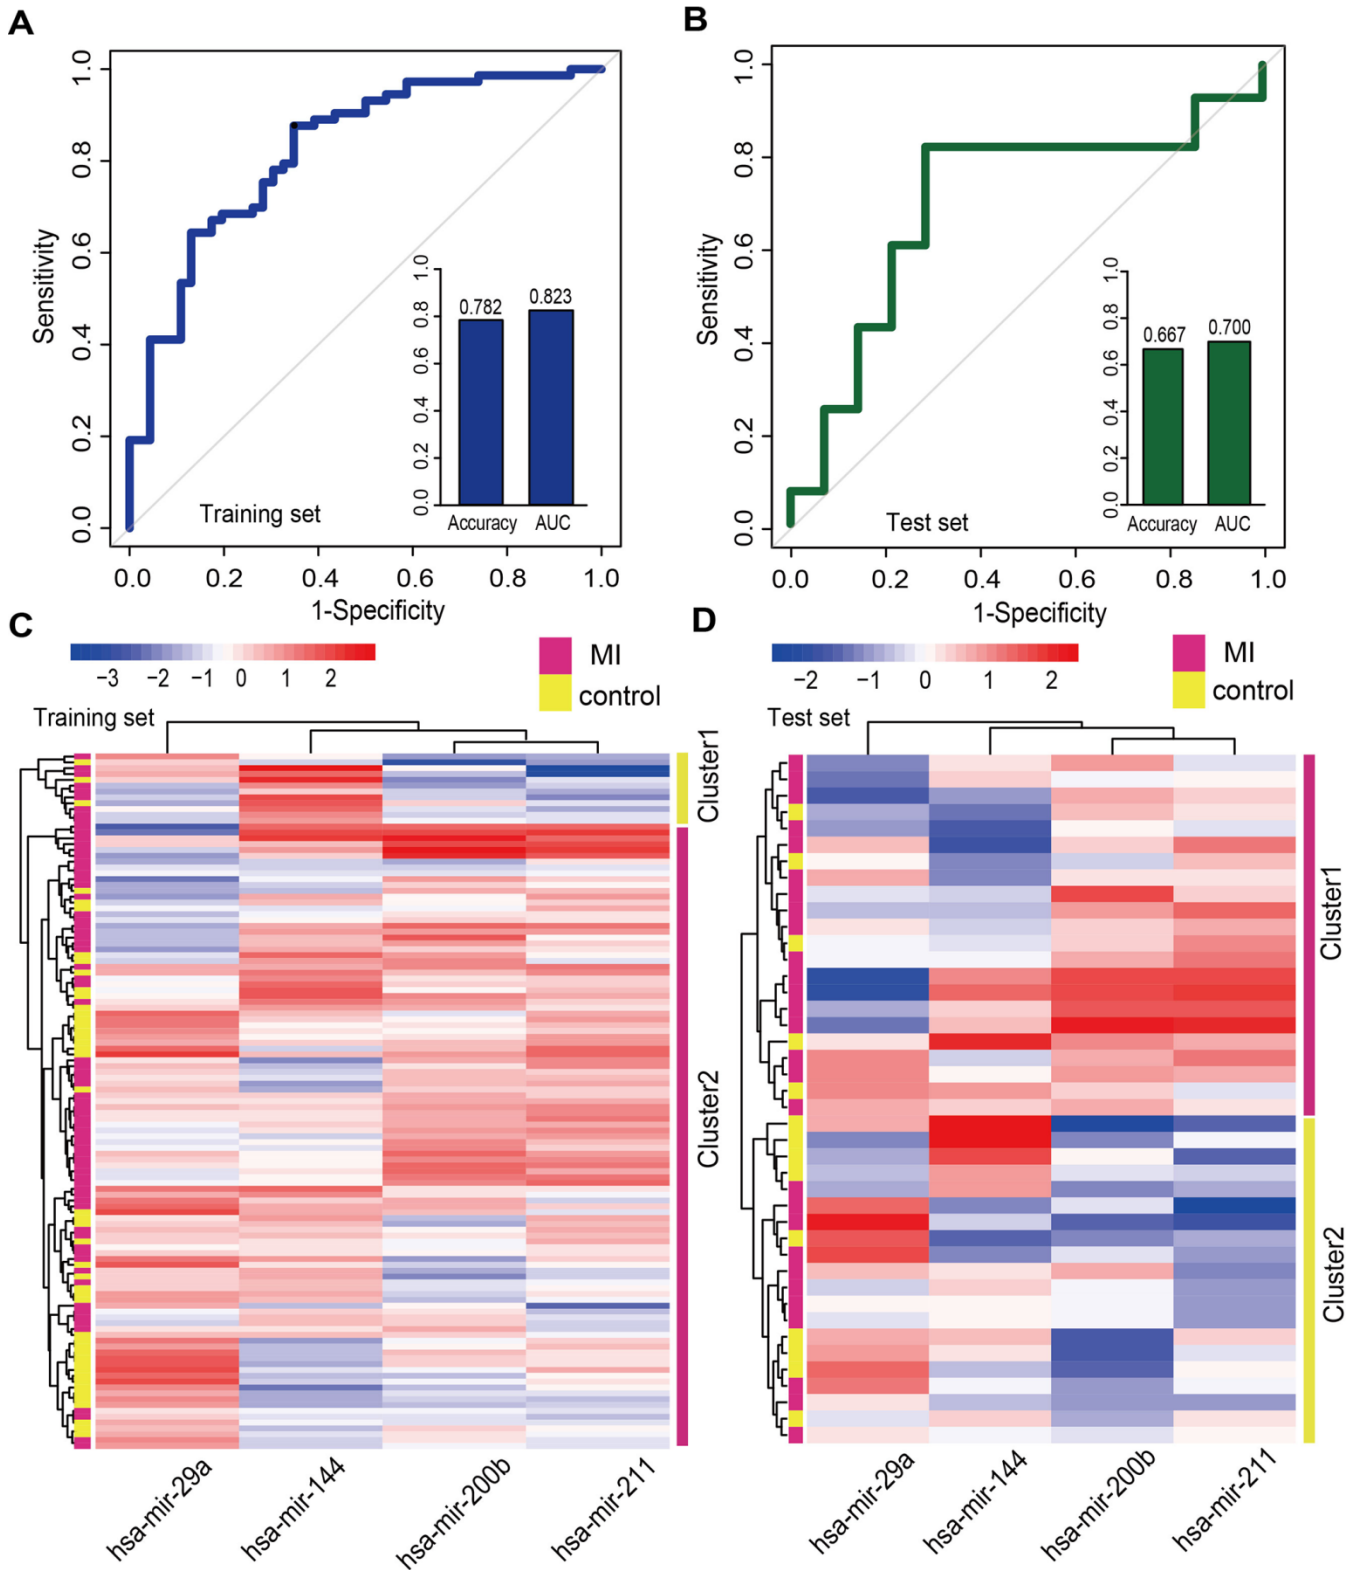

**Supplementary Figure 2. Classification performance of miRNA biomarkers for MI diagnosis based on 5-fold cross-validation analysis.** Performance evaluation of the 4 diagnostic miRNAs biomarkers in the training (A) and test (B) sets. Hierarchical clustering heatmap of the expression profiles of the 4 miRNAs in (C) the training set (119 samples), and (D) the test set (42 samples).

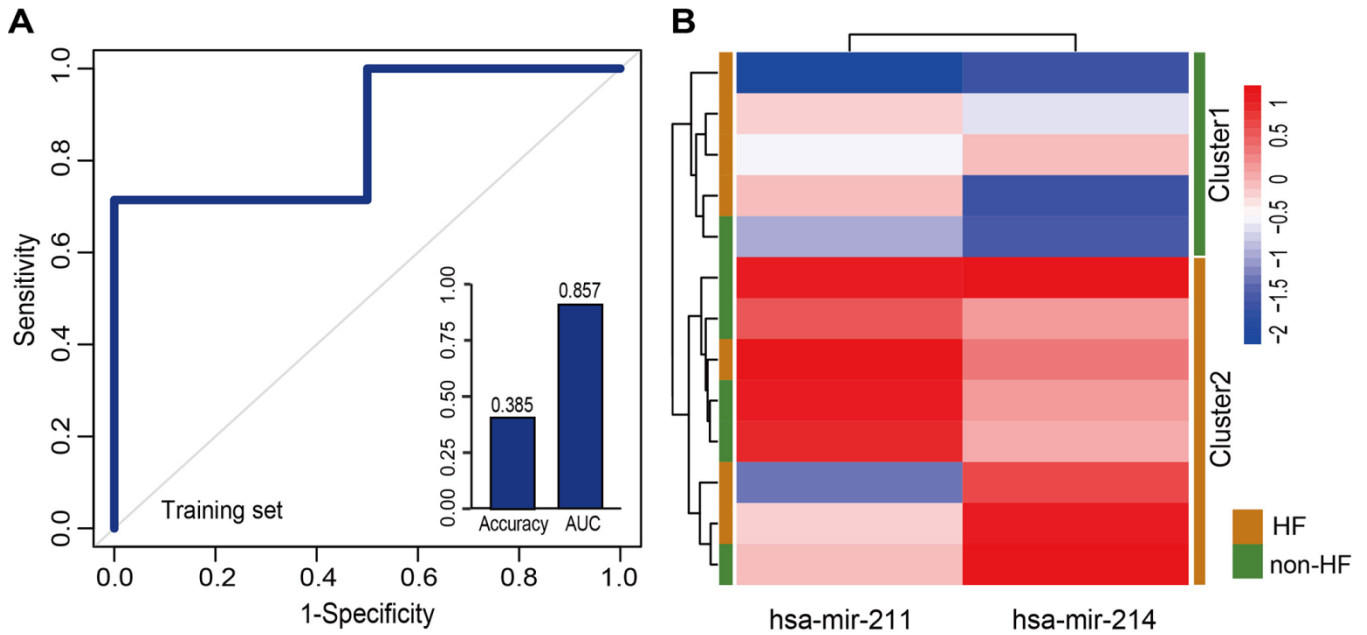

**Supplementary Figure 3. Classification performance of miRNA biomarkers for MI prognosis based on 5-fold cross-validation analysis.** (A) Performance evaluation of the 2 prognostic miRNA biomarkers in the training set. (B) Hierarchical clustering heat map of 13 samples based on expression profiles of the 2 miRNAs in the training set.

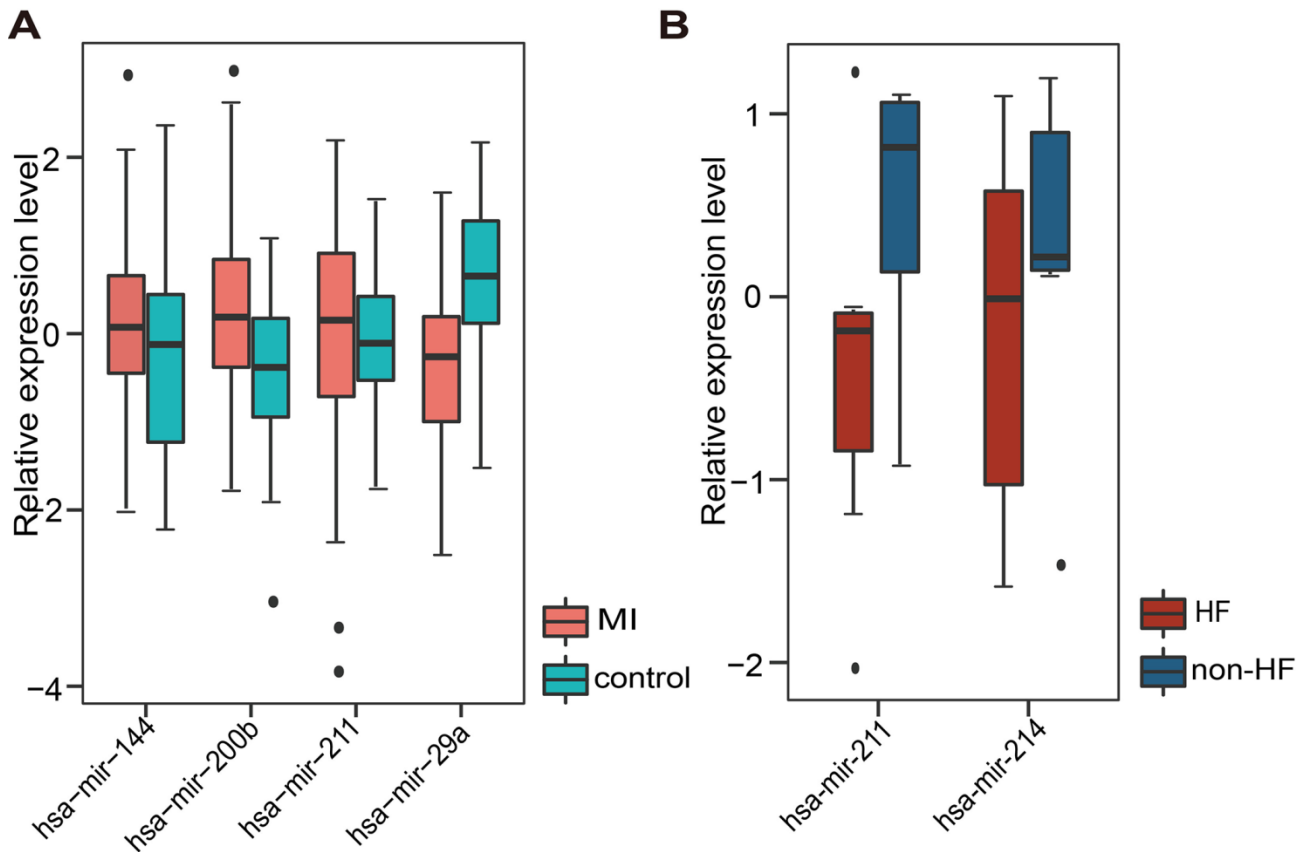

**Supplementary Figure 4. Expression levels of diagnostic and prognostic miRNA biomarkers in MI.** (A) Relative expression of 4 SDE miRNAs in MI and control samples. (B) Relative expression of 2 SDE miRNAs in HF and non-HF samples.
