# Supplementary material for: Systematic analysis of lncRNA and microRNA dynamic features reveals diagnostic and prognostic biomarkers of myocardial infarction
Source: publisher site journal article supplement (doi:10.18632/aging.102667), 2020-01-12
Supplement: Supplementary file [file aging-v12i1-102667-supplementary-material-SD4.pdf]

**Supplementary Table 3. Ranked percentage of SDE transcripts (mRNAs, miRNAs, and lncRNAs) and known MI-related transcripts contained in dysregulated LmiRM-CTs obtained using our method.**

|                 | <b>Top 5%</b> | <b>Top10%</b> | <b>Top1<br/>5%</b> | <b>Top<br/>20%</b> | <b>Top<br/>30%</b> | <b>Top<br/>40%</b> | <b>Top<br/>50%</b> | <b>100%</b> |
|-----------------|---------------|---------------|--------------------|--------------------|--------------------|--------------------|--------------------|-------------|
| SDE_transcripts | 96.77%        | 97.14%        | 96.82%             | 96.34%             | 94.86%             | 93.55%             | 93.50%             | 92.35%      |
| MI_transcripts  | 8.06%         | 7.62%         | 9.55%              | 8.38%              | 8.69%              | 8.06%              | 7.32%              | 6.82%       |
