# Supplementary material for: Systematic analysis of lncRNA and microRNA dynamic features reveals diagnostic and prognostic biomarkers of myocardial infarction
Source: Aging (Albany NY). 2020 Jan 12;12(1):945–64. doi: 10.18632/aging.102667 (PMC6977700; doi:10.18632/aging.102667)
Supplement: Supplementary Table 1 [file aging-12-102667-s002..xlsx]

## Sheet: Subpathways of lncRNA clusters
Cluster1				Cluster2				Cluster3				Cluster4				Cluster5				Cluster6
SubpathwayId	SubpathwayName	p-value		SubpathwayId	SubpathwayName	p-value		SubpathwayId	SubpathwayName	p-value		SubpathwayId	SubpathwayName	p-value		SubpathwayId	SubpathwayName	p-value		SubpathwayId	SubpathwayName	p-value
path:04510_4	Focal adhesion	1.11e-08		path:04666_6	Fc gamma R-mediated phagocytosis	3.47e-08		path:03008_7	Ribosome biogenesis in eukaryotes	1.52e-06		path:05146_1	Amoebiasis	9.14e-10		path:04512_5	ECM-receptor interaction	2.32e-14		path:05200_4	Pathways in cancer	2.93e-06
path:05146_1	Amoebiasis	3.41e-08		path:04062_12	Chemokine signaling pathway	6.9e-08		path:05212_4	Pancreatic cancer	2.2e-05		path:04512_5	ECM-receptor interaction	1.56e-09		path:05146_2	Amoebiasis	6.85e-14		path:04660_11	T cell receptor signaling pathway	1.02e-05
path:04330_1	Notch signaling pathway	7.9e-08		path:04630_2	Jak-STAT signaling pathway	1.45e-07		path:04110_8	Cell cycle	3.72e-05		path:04510_6	Focal adhesion	3.19e-08		path:04151_11	PI3K-Akt signaling pathway	1.16e-10		path:05222_4	Small cell lung cancer	2.2e-05
path:04512_11	ECM-receptor interaction	1.05e-07		path:04380_11	Osteoclast differentiation	3.24e-07		path:05200_15	Pathways in cancer	0.000132566		path:04151_11	PI3K-Akt signaling pathway	3.3e-08		path:04930_4	Type II diabetes mellitus	5.4e-09		path:04650_3	Natural killer cell mediated cytotoxicity	0.000217923
path:04728_4	Dopaminergic synapse	5.46e-07		path:04510_4	Focal adhesion	7.42e-07		path:05166_17	HTLV-I infection	0.000337365		path:04020_3	Calcium signaling pathway	8e-08		path:04010_7	MAPK signaling pathway	2.31e-06		path:05162_12	Measles	0.000225483
path:04151_11	PI3K-Akt signaling pathway	8.23e-07		path:04810_8	Regulation of actin cytoskeleton	9.78e-07		path:05222_4	Small cell lung cancer	0.000384204		path:05166_16	HTLV-I infection	2.58e-07		path:04950_2	Maturity onset diabetes of the young	5.65e-06		path:05414_2	Dilated cardiomyopathy	0.000225483
path:04010_11	MAPK signaling pathway	7.55e-06		path:00310_5	Lysine degradation	1.81e-06		path:05164_5	Influenza A	0.000716917		path:04930_4	Type II diabetes mellitus	3.26e-07		path:04020_3	Calcium signaling pathway	7.19e-06		path:04530_4	Tight junction	0.000294285
path:05166_18	HTLV-I infection	1.51e-05		path:04010_16	MAPK signaling pathway	2.46e-06		path:00500_12	Starch and sucrose metabolism	0.000901039		path:05200_2	Pathways in cancer	8.18e-07		path:04510_6	Focal adhesion	1.08e-05		path:03013_13	RNA transport	0.000328274
path:04810_8	Regulation of actin cytoskeleton	4.1e-05		path:04728_4	Dopaminergic synapse	4.16e-06		path:04114_5	Oocyte meiosis	0.00100225		path:05218_2	Melanoma	1.54e-06		path:05200_8	Pathways in cancer	0.000221449		path:04370_1	VEGF signaling pathway	0.000367605
path:04910_7	Insulin signaling pathway	5.18e-05		path:04066_3	HIF-1 signaling pathway	4.64e-06		path:03018_6	RNA degradation	0.00103084		path:04010_7	MAPK signaling pathway	4.03e-06		path:05218_2	Melanoma	0.000345031		path:05166_4	HTLV-I infection	0.000378525
path:05200_20	Pathways in cancer	7.03e-05		path:05210_3	Colorectal cancer	4.86e-06		path:04270_6	Vascular smooth muscle contraction	0.00103084		path:05217_5	Basal cell carcinoma	1.16e-05		path:05222_2	Small cell lung cancer	0.000479338		path:04510_3	Focal adhesion	0.000583059
path:05014_5	Amyotrophic lateral sclerosis (ALS)	9.54e-05		path:00564_6	Glycerophospholipid metabolism	1.1e-05		path:00510_2	N-Glycan biosynthesis	0.00103084		path:04310_8	Wnt signaling pathway	1.58e-05		path:04728_3	Dopaminergic synapse	0.00058484		path:05212_1	Pancreatic cancer	0.000602615
path:05222_2	Small cell lung cancer	0.000107032		path:05152_2	Tuberculosis	1.19e-05		path:05161_13	Hepatitis B	0.00106079		path:04916_8	Melanogenesis	1.63e-05		path:04713_1	Circadian entrainment	0.00123955		path:04512_15	ECM-receptor interaction	0.000691919
path:04930_4	Type II diabetes mellitus	0.000193325		path:04330_1	Notch signaling pathway	1.2e-05		path:05169_12	Epstein-Barr virus infection	0.00106079		path:04370_2	VEGF signaling pathway	3.38e-05		path:00232_1	Caffeine metabolism	0.00372088		path:04914_5	Progesterone-mediated oocyte maturation	0.000691919
path:04950_2	Maturity onset diabetes of the young	0.000193325		path:05218_2	Melanoma	1.6e-05		path:05221_4	Acute myeloid leukemia	0.00117357		path:04950_2	Maturity onset diabetes of the young	0.000112538		path:05145_10	Toxoplasmosis	0.00411892		path:05223_5	Non-small cell lung cancer	0.000699863
path:04723_2	Retrograde endocannabinoid signaling	0.000197194		path:05133_8	Pertussis	1.66e-05		path:05168_3	Herpes simplex infection	0.00143128		path:05222_2	Small cell lung cancer	0.000207911		path:00350_3	Tyrosine metabolism	0.00411892		path:05161_2	Hepatitis B	0.00080363
path:04310_7	Wnt signaling pathway	0.000285925		path:05110_6	Vibrio cholerae infection	1.79e-05		path:05210_2	Colorectal cancer	0.00143128		path:04062_11	Chemokine signaling pathway	0.000271144		path:04726_1	Serotonergic synapse	0.00565255		path:04662_6	B cell receptor signaling pathway	0.00116552
path:05032_1	Morphine addiction	0.000373072		path:05120_6	Epithelial cell signaling in Helicobacter pylori infection	1.79e-05		path:00280_2	Valine, leucine and isoleucine degradation	0.00151663		path:04728_3	Dopaminergic synapse	0.000302336		path:04744_1	Phototransduction	0.00573355		path:05215_7	Prostate cancer	0.00134678
path:04370_2	VEGF signaling pathway	0.000391622		path:05164_3	Influenza A	1.79e-05		path:04720_4	Long-term potentiation	0.00173014		path:04713_1	Circadian entrainment	0.000348469		path:05217_2	Basal cell carcinoma	0.0106642		path:05169_14	Epstein-Barr virus infection	0.00149688
path:04062_10	Chemokine signaling pathway	0.000465854		path:04370_2	VEGF signaling pathway	2.35e-05		path:03013_13	RNA transport	0.00183096		path:04330_1	Notch signaling pathway	0.000394952		path:05031_3	Amphetamine addiction	0.011532		path:03008_6	Ribosome biogenesis in eukaryotes	0.002906
path:04916_2	Melanogenesis	0.00049138		path:04662_1	B cell receptor signaling pathway	3.05e-05		path:04910_8	Insulin signaling pathway	0.00188064		path:04660_8	T cell receptor signaling pathway	0.000583813		path:05166_16	HTLV-I infection	0.0120844		path:04350_1	TGF-beta signaling pathway	0.00340074
path:04020_3	Calcium signaling pathway	0.000787438		path:04722_1	Neurotrophin signaling pathway	3.76e-05		path:04144_9	Endocytosis	0.00215189		path:04144_2	Endocytosis	0.000733204		path:00340_1	Histidine metabolism	0.0139358		path:04066_3	HIF-1 signaling pathway	0.00406696
path:05203_1	Viral carcinogenesis	0.000795995		path:04210_7	Apoptosis	7.33e-05		path:00562_12	Inositol phosphate metabolism	0.00215189		path:05164_18	Influenza A	0.00119729		path:04340_2	Hedgehog signaling pathway	0.0150995		path:04064_13	NF-kappa B signaling pathway	0.00513277
path:00564_3	Glycerophospholipid metabolism	0.000809655		path:04142_1	Lysosome	7.38e-05		path:05152_5	Tuberculosis	0.00245838		path:05210_3	Colorectal cancer	0.00119729		path:05034_2	Alcoholism	0.0150995		path:05219_2	Bladder cancer	0.00513277
path:00310_5	Lysine degradation	0.000895491		path:05211_1	Renal cell carcinoma	9.85e-05		path:04145_3	Phagosome	0.00260577		path:00604_1	Glycosphingolipid biosynthesis - ganglio series	0.0014232		path:00140_3	Steroid hormone biosynthesis	0.0150995		path:04210_7	Apoptosis	0.00566997
path:05215_5	Prostate cancer	0.000975074		path:05146_4	Amoebiasis	0.000107694		path:04150_8	mTOR signaling pathway	0.00287954		path:05031_3	Amphetamine addiction	0.00166979		path:04724_8	Glutamatergic synapse	0.0171333		path:04910_5	Insulin signaling pathway	0.00566997
path:05210_10	Colorectal cancer	0.00107836		path:04150_8	mTOR signaling pathway	0.000133843		path:04660_8	T cell receptor signaling pathway	0.00287954		path:00603_1	Glycosphingolipid biosynthesis - globo series	0.00201205		path:04720_5	Long-term potentiation	0.0172496		path:04810_17	Regulation of actin cytoskeleton	0.00624206
path:05217_6	Basal cell carcinoma	0.00107836		path:05221_2	Acute myeloid leukemia	0.000133843		path:05142_6	Chagas disease (American trypanosomiasis)	0.00287954		path:04720_3	Long-term potentiation	0.00208103		path:04360_9	Axon guidance	0.0186619		path:04725_7	Cholinergic synapse	0.00661858
path:04660_8	T cell receptor signaling pathway	0.00117504		path:04650_19	Natural killer cell mediated cytotoxicity	0.000138869		path:04064_5	NF-kappa B signaling pathway	0.00296101		path:00350_13	Tyrosine metabolism	0.00223223		path:05213_1	Endometrial cancer	0.0193972		path:04110_4	Cell cycle	0.00721994
path:05218_2	Melanoma	0.00127785		path:04730_7	Long-term depression	0.000150821		path:04914_9	Progesterone-mediated oocyte maturation	0.00296101		path:05414_1	Dilated cardiomyopathy	0.002968		path:00980_8	Metabolism of xenobiotics by cytochrome P450	0.0193972		path:04012_1	ErbB signaling pathway	0.00871323
path:04630_2	Jak-STAT signaling pathway	0.00137786		path:04664_4	Fc epsilon RI signaling pathway	0.000177086		path:05213_2	Endometrial cancer	0.00296101		path:04070_1	Phosphatidylinositol signaling system	0.00318748		path:00360_9	Phenylalanine metabolism	0.0224619		path:05214_4	Glioma	0.00871323
path:04210_8	Apoptosis	0.00137961		path:05212_3	Pancreatic cancer	0.000191888		path:04662_2	B cell receptor signaling pathway	0.00314217		path:00564_3	Glycerophospholipid metabolism	0.00329975		path:04310_8	Wnt signaling pathway	0.0247042		path:05142_11	Chagas disease (American trypanosomiasis)	0.00944577
path:05132_2	Salmonella infection	0.00137961		path:04360_4	Axon guidance	0.000259727		path:04722_5	Neurotrophin signaling pathway	0.00351031		path:04910_4	Insulin signaling pathway	0.00337799		path:04723_2	Retrograde endocannabinoid signaling	0.0258886		path:03460_5	Fanconi anemia pathway	0.010121
path:05212_3	Pancreatic cancer	0.00137961		path:05161_16	Hepatitis B	0.000259727		path:05145_1	Toxoplasmosis	0.0039687		path:05120_8	Epithelial cell signaling in Helicobacter pylori infection	0.00366849		path:04727_1	GABAergic synapse	0.0268657		path:04360_9	Axon guidance	0.0104315
path:04360_4	Axon guidance	0.00152718		path:05220_6	Chronic myeloid leukemia	0.000259727		path:04650_3	Natural killer cell mediated cytotoxicity	0.00411507		path:04210_8	Apoptosis	0.00367251		path:04916_8	Melanogenesis	0.0286334		path:05164_18	Influenza A	0.0104315
path:04713_15	Circadian entrainment	0.00154532		path:05132_12	Salmonella infection	0.000305288		path:04210_8	Apoptosis	0.00492124		path:05212_3	Pancreatic cancer	0.00367251		path:04971_5	Gastric acid secretion	0.0298011		path:04062_1	Chemokine signaling pathway	0.0115104
path:04730_7	Long-term depression	0.00154532		path:05203_1	Viral carcinogenesis	0.000330178		path:04010_20	MAPK signaling pathway	0.00508083		path:04012_3	ErbB signaling pathway	0.00417685		path:04530_11	Tight junction	0.0354573		path:04973_1	Carbohydrate digestion and absorption	0.0122059
path:04666_7	Fc gamma R-mediated phagocytosis	0.00168566		path:00565_3	Ether lipid metabolism	0.000347806		path:04062_4	Chemokine signaling pathway	0.00508083		path:05162_4	Measles	0.00440998		path:04725_5	Cholinergic synapse	0.0354573		path:03018_6	RNA degradation	0.0153793
path:04066_3	HIF-1 signaling pathway	0.00183245		path:05215_4	Prostate cancer	0.000366424		path:04070_2	Phosphatidylinositol signaling system	0.00597746		path:04066_3	HIF-1 signaling pathway	0.00466566		path:05032_1	Morphine addiction	0.0354573		path:05210_4	Colorectal cancer	0.0161717
path:04150_7	mTOR signaling pathway	0.00183245		path:04910_7	Insulin signaling pathway	0.000373689		path:04930_2	Type II diabetes mellitus	0.00604554		path:04912_3	GnRH signaling pathway	0.00466566		path:05414_1	Dilated cardiomyopathy	0.0354573		path:04666_2	Fc gamma R-mediated phagocytosis	0.0165178
path:04340_2	Hedgehog signaling pathway	0.00195379		path:05214_1	Glioma	0.00042231		path:04973_1	Carbohydrate digestion and absorption	0.00612788		path:04662_1	B cell receptor signaling pathway	0.00487202		path:00983_2	Drug metabolism - other enzymes	0.0425912		path:03015_5	mRNA surveillance pathway	0.0184566
path:05164_18	Influenza A	0.00210902		path:05160_11	Hepatitis C	0.000474358		path:05223_1	Non-small cell lung cancer	0.00734575		path:00562_8	Inositol phosphate metabolism	0.00503619		path:04514_13	Cell adhesion molecules (CAMs)	0.0498628		path:04960_3	Aldosterone-regulated sodium reabsorption	0.0189726
path:05160_11	Hepatitis C	0.00222952		path:04660_5	T cell receptor signaling pathway	0.000505501		path:04141_2	Protein processing in endoplasmic reticulum	0.00824715		path:00360_9	Phenylalanine metabolism	0.00523028		path:05110_1	Vibrio cholerae infection	0.0498628		path:00280_2	Valine, leucine and isoleucine degradation	0.0189726
path:00565_3	Ether lipid metabolism	0.00239479		path:05142_11	Chagas disease (American trypanosomiasis)	0.000510361		path:05220_6	Chronic myeloid leukemia	0.00842645		path:04722_9	Neurotrophin signaling pathway	0.00584831						path:05220_4	Chronic myeloid leukemia	0.0220892
path:05161_8	Hepatitis B	0.00284825		path:04725_6	Cholinergic synapse	0.000520884		path:04728_7	Dopaminergic synapse	0.00861261		path:00565_3	Ether lipid metabolism	0.00584831						path:04270_10	Vascular smooth muscle contraction	0.0229892
path:00350_13	Tyrosine metabolism	0.00296283		path:05162_8	Measles	0.000673202		path:04621_2	NOD-like receptor signaling pathway	0.00883623		path:04360_9	Axon guidance	0.00634191						path:00230_1	Purine metabolism	0.0245322
path:05031_3	Amphetamine addiction	0.00308373		path:05168_14	Herpes simplex infection	0.000673202		path:04151_3	PI3K-Akt signaling pathway	0.0104682		path:05215_4	Prostate cancer	0.00634191						path:04728_5	Dopaminergic synapse	0.0271963
path:05145_9	Toxoplasmosis	0.0031776		path:05145_9	Toxoplasmosis	0.000690362		path:04360_9	Axon guidance	0.0104682		path:00592_1	alpha-Linolenic acid metabolism	0.00634191						path:05218_2	Melanoma	0.0271963
path:04270_2	Vascular smooth muscle contraction	0.00377064		path:05222_8	Small cell lung cancer	0.000690362		path:04012_9	ErbB signaling pathway	0.0111439		path:05214_1	Glioma	0.00685571						path:04070_2	Phosphatidylinositol signaling system	0.0272401
path:04060_35	Cytokine-cytokine receptor interaction	0.00379913		path:04973_1	Carbohydrate digestion and absorption	0.000825149		path:04960_3	Aldosterone-regulated sodium reabsorption	0.0111439		path:04742_3	Taste transduction	0.00708199						path:04151_11	PI3K-Akt signaling pathway	0.0272401
path:05169_10	Epstein-Barr virus infection	0.00439642		path:04723_2	Retrograde endocannabinoid signaling	0.000998215		path:05131_10	Shigellosis	0.0125248		path:04724_8	Glutamatergic synapse	0.00727009						path:05160_11	Hepatitis C	0.0274297
path:05221_2	Acute myeloid leukemia	0.00491455		path:00600_4	Sphingolipid metabolism	0.0011269		path:04912_10	GnRH signaling pathway	0.0125515		path:05221_1	Acute myeloid leukemia	0.00834881						path:05213_2	Endometrial cancer	0.0274297
path:00562_2	Inositol phosphate metabolism	0.00531472		path:05166_11	HTLV-I infection	0.00118625		path:04664_5	Fc epsilon RI signaling pathway	0.014588		path:04725_7	Cholinergic synapse	0.00886495						path:04540_8	Gap junction	0.0283294
path:04724_2	Glutamatergic synapse	0.00583328		path:04012_3	ErbB signaling pathway	0.00120876		path:05211_1	Renal cell carcinoma	0.0155135		path:04340_2	Hedgehog signaling pathway	0.0101986						path:04114_13	Oocyte meiosis	0.0318031
path:04144_10	Endocytosis	0.00668388		path:04670_2	Leukocyte transendothelial migration	0.00120876		path:03015_9	mRNA surveillance pathway	0.0182313		path:04620_17	Toll-like receptor signaling pathway	0.0101986						path:04520_1	Adherens junction	0.0321131
path:00920_1	Sulfur metabolism	0.00668388		path:05134_2	Legionellosis	0.00125232		path:05120_5	Epithelial cell signaling in Helicobacter pylori infection	0.0182313		path:05034_2	Alcoholism	0.0101986						path:04620_15	Toll-like receptor signaling pathway	0.032292
path:04914_5	Progesterone-mediated oocyte maturation	0.00689517		path:05202_3	Transcriptional misregulation in cancer	0.00125232		path:05160_11	Hepatitis C	0.0182313		path:05142_11	Chagas disease (American trypanosomiasis)	0.0101986						path:05100_2	Bacterial invasion of epithelial cells	0.032292
path:00360_9	Phenylalanine metabolism	0.00689517		path:04620_18	Toll-like receptor signaling pathway	0.00126475		path:04810_15	Regulation of actin cytoskeleton	0.0191531		path:04150_9	mTOR signaling pathway	0.0107404						path:05145_9	Toxoplasmosis	0.032292
path:00531_4	Glycosaminoglycan degradation	0.00689517		path:04060_35	Cytokine-cytokine receptor interaction	0.00127261		path:04370_2	VEGF signaling pathway	0.0216113		path:05133_7	Pertussis	0.0107404						path:04630_2	Jak-STAT signaling pathway	0.0353091
path:04070_1	Phosphatidylinositol signaling system	0.00748007		path:05169_12	Epstein-Barr virus infection	0.00134253		path:04350_1	TGF-beta signaling pathway	0.0219626		path:05220_3	Chronic myeloid leukemia	0.0107404						path:04380_1	Osteoclast differentiation	0.0375718
path:04662_1	B cell receptor signaling pathway	0.00781383		path:04520_8	Adherens junction	0.00149997		path:05218_3	Melanoma	0.0219626		path:05145_9	Toxoplasmosis	0.0110204						path:04664_4	Fc epsilon RI signaling pathway	0.0394675
path:05220_6	Chronic myeloid leukemia	0.00781383		path:05223_2	Non-small cell lung cancer	0.0018066		path:00240_5	Pyrimidine metabolism	0.0222297		path:04664_4	Fc epsilon RI signaling pathway	0.0128877						path:04514_65	Cell adhesion molecules (CAMs)	0.0419716
path:05223_2	Non-small cell lung cancer	0.00781383		path:04724_6	Glutamatergic synapse	0.00194017		path:04620_15	Toll-like receptor signaling pathway	0.0226197		path:04723_2	Retrograde endocannabinoid signaling	0.0132702						path:00561_1	Glycerolipid metabolism	0.0462561
path:04720_1	Long-term potentiation	0.00819328		path:05200_13	Pathways in cancer	0.00214817		path:00970_1	Aminoacyl-tRNA biosynthesis	0.0239532		path:04380_1	Osteoclast differentiation	0.0142204
path:04514_60	Cell adhesion molecules (CAMs)	0.00859216		path:05140_4	Leishmaniasis	0.00216548		path:05146_5	Amoebiasis	0.0243485		path:04622_4	RIG-I-like receptor signaling pathway	0.0142204
path:05150_14	Staphylococcus aureus infection	0.00859216		path:05131_5	Shigellosis	0.00238266		path:04066_10	HIF-1 signaling pathway	0.0257524		path:05132_5	Salmonella infection	0.0142204
path:05202_6	Transcriptional misregulation in cancer	0.00859216		path:05100_18	Bacterial invasion of epithelial cells	0.00262646		path:04670_18	Leukocyte transendothelial migration	0.0257524		path:05169_10	Epstein-Barr virus infection	0.0142204
path:04620_13	Toll-like receptor signaling pathway	0.00908566		path:04726_3	Serotonergic synapse	0.00265524		path:04380_1	Osteoclast differentiation	0.0275969		path:05213_4	Endometrial cancer	0.0142204
path:04350_9	TGF-beta signaling pathway	0.00927019		path:04151_11	PI3K-Akt signaling pathway	0.00288642		path:04510_17	Focal adhesion	0.0275969		path:04973_1	Carbohydrate digestion and absorption	0.0142919
path:00604_5	Glycosphingolipid biosynthesis - ganglio series	0.0097957		path:04914_5	Progesterone-mediated oocyte maturation	0.00296926		path:05014_2	Amyotrophic lateral sclerosis (ALS)	0.0275969		path:04810_20	Regulation of actin cytoskeleton	0.0144555
path:04722_9	Neurotrophin signaling pathway	0.00983963		path:00531_2	Glycosaminoglycan degradation	0.00296926		path:05031_7	Amphetamine addiction	0.0275969		path:05030_2	Cocaine addiction	0.0154924
path:00592_1	alpha-Linolenic acid metabolism	0.0100957		path:04512_11	ECM-receptor interaction	0.0030866		path:04666_2	Fc gamma R-mediated phagocytosis	0.0291881		path:00310_4	Lysine degradation	0.0154924
path:04012_6	ErbB signaling pathway	0.0128136		path:05130_3	Pathogenic Escherichia coli infection	0.0030866		path:05214_3	Glioma	0.0299358		path:00232_1	Caffeine metabolism	0.0160947
path:04540_9	Gap junction	0.0128136		path:05032_1	Morphine addiction	0.00325989		path:05215_3	Prostate cancer	0.0345226		path:04666_8	Fc gamma R-mediated phagocytosis	0.0173731
path:05214_1	Glioma	0.0131473		path:05014_5	Amyotrophic lateral sclerosis (ALS)	0.00341233		path:04130_2	SNARE interactions in vesicular transport	0.0381849		path:05161_14	Hepatitis B	0.0179889
path:05034_2	Alcoholism	0.0142768		path:04713_5	Circadian entrainment	0.0035428		path:03460_2	Fanconi anemia pathway	0.0395208		path:04630_2	Jak-STAT signaling pathway	0.0180024
path:05142_11	Chagas disease (American trypanosomiasis)	0.0142768		path:05213_2	Endometrial cancer	0.00360469		path:04725_7	Cholinergic synapse	0.0395208		path:00510_4	N-Glycan biosynthesis	0.0192908
path:05152_2	Tuberculosis	0.0160052		path:04070_1	Phosphatidylinositol signaling system	0.00461693		path:05162_3	Measles	0.0404419		path:04060_5	Cytokine-cytokine receptor interaction	0.0200547
path:00983_3	Drug metabolism - other enzymes	0.0163425		path:04514_60	Cell adhesion molecules (CAMs)	0.00477957		path:00270_3	Cysteine and methionine metabolism	0.0404419		path:04140_4	Regulation of autophagy	0.0200547
path:04725_6	Cholinergic synapse	0.0163795		path:04672_12	Intestinal immune network for IgA production	0.00477957		path:04710_1	Circadian rhythm	0.0449362		path:05012_1	Parkinson's disease	0.0200547
path:05133_7	Pertussis	0.0176684		path:05150_14	Staphylococcus aureus infection	0.00477957						path:04650_15	Natural killer cell mediated cytotoxicity	0.0211549
path:04726_3	Serotonergic synapse	0.0196606		path:04622_4	RIG-I-like receptor signaling pathway	0.00629735						path:05223_2	Non-small cell lung cancer	0.0223612
path:04973_1	Carbohydrate digestion and absorption	0.0198678		path:00562_2	Inositol phosphate metabolism	0.0067219						path:04744_1	Phototransduction	0.0241575
path:00232_1	Caffeine metabolism	0.0209362		path:05034_5	Alcoholism	0.00751115						path:05140_6	Leishmaniasis	0.0241575
path:04064_4	NF-kappa B signaling pathway	0.0209372		path:00010_1	Glycolysis / Gluconeogenesis	0.00806692						path:05168_9	Herpes simplex infection	0.0241575
path:04380_1	Osteoclast differentiation	0.0209372		path:00030_3	Pentose phosphate pathway	0.00910286						path:00531_3	Glycosaminoglycan degradation	0.0241575
path:04622_4	RIG-I-like receptor signaling pathway	0.0209372		path:00830_3	Retinol metabolism	0.00935326						path:04727_1	GABAergic synapse	0.0244659
path:04970_4	Salivary secretion	0.0209372		path:00590_5	Arachidonic acid metabolism	0.00987876						path:04971_5	Gastric acid secretion	0.0252432
path:05213_4	Endometrial cancer	0.0209372		path:05030_4	Cocaine addiction	0.0101537						path:04350_9	TGF-beta signaling pathway	0.0321821
path:04664_4	Fc epsilon RI signaling pathway	0.021044		path:00592_1	alpha-Linolenic acid metabolism	0.0125821						path:04270_4	Vascular smooth muscle contraction	0.0324454
path:05030_2	Cocaine addiction	0.0239477		path:04310_3	Wnt signaling pathway	0.0129828						path:04530_11	Tight junction	0.0325249
path:00240_4	Pyrimidine metabolism	0.0239477		path:04064_17	NF-kappa B signaling pathway	0.0130172						path:05032_1	Morphine addiction	0.0325249
path:05012_1	Parkinson's disease	0.0241845		path:04960_4	Aldosterone-regulated sodium reabsorption	0.0130172						path:04540_9	Gap junction	0.0330315
path:04727_2	GABAergic synapse	0.025146		path:00920_1	Sulfur metabolism	0.0130172						path:04621_3	NOD-like receptor signaling pathway	0.0330315
path:04650_16	Natural killer cell mediated cytotoxicity	0.0262977		path:05012_1	Parkinson's disease	0.0136784						path:05152_5	Tuberculosis	0.0330315
path:04971_4	Gastric acid secretion	0.0287592		path:05144_2	Malaria	0.0136784						path:04623_2	Cytosolic DNA-sensing pathway	0.034004
path:04520_8	Adherens junction	0.0290845		path:04145_6	Phagosome	0.0142017						path:05134_2	Legionellosis	0.0378773
path:04142_1	Lysosome	0.0312185		path:04621_3	NOD-like receptor signaling pathway	0.015375						path:05202_2	Transcriptional misregulation in cancer	0.0378773
path:05140_6	Leishmaniasis	0.0312185		path:05414_2	Dilated cardiomyopathy	0.015375						path:00340_1	Histidine metabolism	0.0378773
path:04962_2	Vasopressin-regulated water reabsorption	0.032459		path:04270_5	Vascular smooth muscle contraction	0.0167956						path:04726_1	Serotonergic synapse	0.0389862
path:05010_8	Alzheimer's disease	0.0346114		path:04623_2	Cytosolic DNA-sensing pathway	0.0202197						path:04914_9	Progesterone-mediated oocyte maturation	0.0401265
path:05162_4	Measles	0.0346114		path:05410_1	Hypertrophic cardiomyopathy (HCM)	0.0202197						path:05131_7	Shigellosis	0.0401265
path:00590_3	Arachidonic acid metabolism	0.0430757		path:04720_1	Long-term potentiation	0.0214365						path:05160_5	Hepatitis C	0.0401265
path:04623_2	Cytosolic DNA-sensing pathway	0.0436583		path:05323_6	Rheumatoid arthritis	0.0261044						path:05014_5	Amyotrophic lateral sclerosis (ALS)	0.0455991
path:05100_8	Bacterial invasion of epithelial cells	0.0436583		path:04350_1	TGF-beta signaling pathway	0.0261351						path:04730_1	Long-term depression	0.0480438
path:05410_1	Hypertrophic cardiomyopathy (HCM)	0.0436583		path:04930_2	Type II diabetes mellitus	0.0305694						path:00591_1	Linoleic acid metabolism	0.0480438
path:05414_5	Dilated cardiomyopathy	0.0438263		path:04727_2	GABAergic synapse	0.0312216
path:05131_3	Shigellosis	0.0454061		path:00051_1	Fructose and mannose metabolism	0.035805
path:05134_2	Legionellosis	0.0454061		path:00520_20	Amino sugar and nucleotide sugar metabolism	0.035805
path:00340_1	Histidine metabolism	0.0454061		path:04530_6	Tight junction	0.0372278
path:04621_3	NOD-like receptor signaling pathway	0.047281		path:04020_1	Calcium signaling pathway	0.0376888
path:04670_1	Leukocyte transendothelial migration	0.047281		path:04540_8	Gap junction	0.04078
path:05130_3	Pathogenic Escherichia coli infection	0.047281		path:05031_3	Amphetamine addiction	0.04078
				path:04122_1	Sulfur relay system	0.0415278
				path:04320_5	Dorso-ventral axis formation	0.0415278
				path:04612_1	Antigen processing and presentation	0.0415278
				path:05216_3	Thyroid cancer	0.0415278
				path:04920_8	Adipocytokine signaling pathway	0.0453219
				path:04962_2	Vasopressin-regulated water reabsorption	0.0453219
				path:05219_1	Bladder cancer	0.0453423
				path:00603_1	Glycosphingolipid biosynthesis - globo series	0.0453423

## Sheet: Subpathways of miRNA clusters
Cluster1				Cluster2				Cluster3
SubpathwayId	SubpathwayName	p-value		SubpathwayId	SubpathwayName	p-value		SubpathwayId	SubpathwayName	p-value
path:00310_4	Lysine degradation	5.76e-06		Non	Non	Non		path:04720_5	Long-term potentiation	0.000221443
path:05164_2	Influenza A	0.000206831						path:04010_1	MAPK signaling pathway	0.000532111
path:05160_2	Hepatitis C	0.000487497						path:04064_4	NF-kappa B signaling pathway	0.00075978
path:04622_4	RIG-I-like receptor signaling pathway	0.00085395						path:03013_14	RNA transport	0.00209563
path:04728_7	Dopaminergic synapse	0.00130695						path:04910_5	Insulin signaling pathway	0.00282973
path:05168_7	Herpes simplex infection	0.00226902						path:05145_2	Toxoplasmosis	0.0035445
path:05132_2	Salmonella infection	0.00227872						path:05162_2	Measles	0.0035445
path:05161_5	Hepatitis B	0.00227872						path:04620_16	Toll-like receptor signaling pathway	0.00534295
path:04064_20	NF-kappa B signaling pathway	0.00300422						path:05168_6	Herpes simplex infection	0.00636868
path:04151_7	PI3K-Akt signaling pathway	0.00313792						path:04270_6	Vascular smooth muscle contraction	0.00747635
path:04623_2	Cytosolic DNA-sensing pathway	0.00383562						path:00510_2	N-Glycan biosynthesis	0.00747635
path:05166_20	HTLV-I infection	0.00383562						path:04310_4	Wnt signaling pathway	0.00835662
path:04810_2	Regulation of actin cytoskeleton	0.00552724						path:04150_2	mTOR signaling pathway	0.00866419
path:05162_3	Measles	0.00688602						path:00280_2	Valine, leucine and isoleucine degradation	0.00866419
path:04722_2	Neurotrophin signaling pathway	0.00932601						path:04660_2	T cell receptor signaling pathway	0.00993048
path:04150_2	mTOR signaling pathway	0.00936282						path:05161_1	Hepatitis B	0.00993048
path:05034_6	Alcoholism	0.00936282						path:05216_2	Thyroid cancer	0.00993048
path:05120_5	Epithelial cell signaling in Helicobacter pylori infection	0.0121758						path:00020_8	Citrate cycle (TCA cycle)	0.00993048
path:05131_7	Shigellosis	0.0121758						path:00565_1	Ether lipid metabolism	0.0101784
path:04666_6	Fc gamma R-mediated phagocytosis	0.0127769						path:04728_7	Dopaminergic synapse	0.0107982
path:05031_7	Amphetamine addiction	0.0153098						path:04722_8	Neurotrophin signaling pathway	0.0112735
path:05030_7	Cocaine addiction	0.0205808						path:05166_22	HTLV-I infection	0.0112735
path:04514_60	Cell adhesion molecules (CAMs)	0.0210836						path:04151_2	PI3K-Akt signaling pathway	0.0126916
path:05134_5	Legionellosis	0.0210836						path:04210_3	Apoptosis	0.0126916
path:05142_3	Chagas disease (American trypanosomiasis)	0.0210836						path:05164_6	Influenza A	0.0126916
path:05150_14	Staphylococcus aureus infection	0.0210836						path:04510_17	Focal adhesion	0.0141831
path:05202_6	Transcriptional misregulation in cancer	0.0210836						path:05210_10	Colorectal cancer	0.0157463
path:04062_11	Chemokine signaling pathway	0.0224827						path:05212_4	Pancreatic cancer	0.0173797
path:04621_3	NOD-like receptor signaling pathway	0.0224827						path:05223_2	Non-small cell lung cancer	0.0173797
path:04144_1	Endocytosis	0.0314587						path:04360_9	Axon guidance	0.0190817
path:04620_7	Toll-like receptor signaling pathway	0.0376522						path:04670_10	Leukocyte transendothelial migration	0.0190817
path:04010_18	MAPK signaling pathway	0.0400653						path:04520_5	Adherens junction	0.0202536
path:05133_7	Pertussis	0.0400653						path:05200_13	Pathways in cancer	0.0223058
path:03018_4	RNA degradation	0.0417242						path:05222_7	Small cell lung cancer	0.0226853
path:05130_2	Pathogenic Escherichia coli infection	0.0417242						path:05218_3	Melanoma	0.0265448
path:04520_9	Adherens junction	0.0425354						path:05221_4	Acute myeloid leukemia	0.0285669
path:05152_9	Tuberculosis	0.0425354						path:03018_5	RNA degradation	0.0302266
								path:05131_10	Shigellosis	0.0302266
								path:04114_8	Oocyte meiosis	0.0327885
								path:04725_7	Cholinergic synapse	0.0349853
								path:04710_1	Circadian rhythm	0.0372374
								path:04964_1	Proximal tubule bicarbonate reclamation	0.0400985
								path:05214_10	Glioma	0.0400985
								path:00471_1	D-Glutamine and D-glutamate metabolism	0.0400985
								path:04062_4	Chemokine signaling pathway	0.0443133
								path:04320_5	Dorso-ventral axis formation	0.0498703
								path:04726_4	Serotonergic synapse	0.0498703
								path:04914_5	Progesterone-mediated oocyte maturation	0.0498703
