# Supplementary material for: Systematic analysis of lncRNA and microRNA dynamic features reveals diagnostic and prognostic biomarkers of myocardial infarction
Source: Aging (Albany NY). 2020 Jan 12;12(1):945–64. doi: 10.18632/aging.102667 (PMC6977700; doi:10.18632/aging.102667)
Supplement: Supplementary Table 2 [file aging-12-102667-s006..xlsx]

## Sheet: Sheet1
The identified 1173 dysregulated LmiRM-CTs in MI using our method									The identified 941 dysregulated LmiRM-CTs in MI using traditional method
mRNA	miRNA	lncRNA	p-value						mRNA	miRNA	lncRNA
GOLGA4	hsa-let-7b	SNHG16	0						ABL1	hsa-mir-17	LOC100506472
KPNA5	hsa-mir-197	SNHG1	0						AHCTF1	hsa-let-7b	MALAT1
KPNA5	hsa-let-7b	SNHG16	0						AHCTF1	hsa-let-7b	SNHG16
LRRC40	hsa-let-7b	SNHG16	0						AK3	hsa-mir-197	CTC-559E9.4
ZNF644	hsa-let-7b	SNHG16	0						ALMS1	hsa-mir-197	CTC-559E9.4
KPNA5	hsa-let-7b	SNHG1	0.0001						ATE1	hsa-let-7b	MALAT1
PDCD4	hsa-mir-197	SNHG1	0.0001						BTF3L4	hsa-mir-197	CTC-559E9.4
SPCS3	hsa-let-7b	SNHG1	0.0001						CCDC186	hsa-let-7b	MALAT1
LRRC40	hsa-let-7b	SNHG1	0.0002						CHIC2	hsa-mir-197	MALAT1
NAA15	hsa-let-7b	SNHG1	0.0002						COPS2	hsa-let-7b	MALAT1
PLEKHA3	hsa-let-7b	SNHG16	0.0002						DPP8	hsa-mir-197	CTC-559E9.4
TROVE2	hsa-let-7b	SNHG16	0.0002						HDAC10	hsa-mir-17	LOC100506472
CCDC186	hsa-let-7b	SNHG16	0.0003						ICA1L	hsa-mir-197	CTC-559E9.4
CHD1	hsa-let-7b	SNHG16	0.0003						IPO8	hsa-let-7b	MALAT1
DNAJC10	hsa-mir-185	SCARNA9	0.0003						ISCA1	hsa-mir-197	CTC-559E9.4
MMS22L	hsa-let-7b	SNHG16	0.0003						KCNK6	hsa-mir-17	LOC100506472
RNMT	hsa-let-7b	SNHG16	0.0003						LRRC58	hsa-mir-197	CTC-559E9.4
ZMYM2	hsa-let-7b	SNHG16	0.0003						LSM6	hsa-let-7b	GAS5
ANP32E	hsa-let-7b	SNHG16	0.0004						LSM6	hsa-let-7b	MALAT1
AZIN1	hsa-mir-30e	SNHG16	0.0004						LSM6	hsa-let-7b	SNHG1
BZW1	hsa-mir-197	SNHG1	0.0004						LZIC	hsa-mir-197	CTC-559E9.4
GOLGA4	hsa-let-7a-3	SNHG16	0.0004						MNT	hsa-mir-17	LOC100506472
HBP1	hsa-let-7b	SNHG16	0.0004						NONO	hsa-mir-197	CTC-559E9.4
NAP1L1	hsa-let-7b	SNHG16	0.0004						PCGF1	hsa-mir-186	HNRNPUL2-BSCL2
SERBP1	hsa-let-7b	SNHG16	0.0004						PCGF1	hsa-mir-186	RP11-793H13.8
SLC30A7	hsa-mir-185	SCARNA9	0.0004						PCGF1	hsa-mir-186	TMX2-CTNND1
TSEN15	hsa-let-7b	SNHG16	0.0004						POLM	hsa-mir-17	LOC100506472
ZNF644	hsa-let-7b	SNHG1	0.0004						RBM34	hsa-let-7b	CTB-89H12.4
ZNF644	hsa-let-7a-3	SNHG16	0.0004						RBM34	hsa-let-7b	MALAT1
APPL1	hsa-let-7b	SNHG16	0.0005						RBM34	hsa-let-7b	SNHG16
ATP2B1	hsa-let-7a-3	SNHG16	0.0005						RBM41	hsa-mir-197	CTC-559E9.4
BZW1	hsa-let-7b	SNHG1	0.0005						SET	hsa-mir-197	CTC-559E9.4
COPB1	hsa-mir-185	SCARNA9	0.0005						SUDS3	hsa-mir-197	MALAT1
COPS2	hsa-let-7b	SNHG1	0.0005						TAF9	hsa-let-7b	CTB-89H12.4
GABPB1	hsa-let-7b	SNHG16	0.0005						TAF9	hsa-let-7b	MALAT1
GOLGA4	hsa-let-7b	SNHG1	0.0005						TAF9	hsa-let-7b	SNHG16
KIAA1143	hsa-let-7b	SNHG16	0.0005						TRIP12	hsa-let-7b	MALAT1
KPNA5	hsa-mir-197	TUG1	0.0005						TSEN15	hsa-let-7b	MALAT1
NIPBL	hsa-let-7b	SNHG16	0.0005						TSEN15	hsa-let-7b	SNHG16
RIF1	hsa-mir-30e	SNHG16	0.0005						UBA3	hsa-let-7b	MALAT1
SFT2D3	hsa-let-7b	SNHG16	0.0005						UBE2M	hsa-let-7b	MALAT1
SYF2	hsa-let-7a-3	SNHG16	0.0005						ZNF813	hsa-mir-197	CTC-559E9.4
TES	hsa-let-7b	SNHG16	0.0005						FAM43A	hsa-let-7f-1	XXbac-BPG300A18.13
ASCC3	hsa-let-7b	SNHG16	0.0006						LIMD2	hsa-let-7f-1	XXbac-BPG300A18.13
ATG5	hsa-mir-30e	SNHG16	0.0006						RAB40C	hsa-let-7f-1	XXbac-BPG300A18.13
IPO8	hsa-let-7b	SNHG16	0.0006						CDV3	hsa-let-7b	SNHG16
MBNL1	hsa-let-7b	SNHG16	0.0006						ARID3A	hsa-let-7f-1	XXbac-BPG300A18.13
SHOC2	hsa-let-7b	SNHG16	0.0006						C1RL	hsa-let-7f-1	XXbac-BPG300A18.13
AMD1	hsa-let-7a-3	SNHG16	0.0007						SUOX	hsa-let-7f-1	RP11-264B17.3
CEP135	hsa-let-7b	SNHG16	0.0007						EIF4G2	hsa-let-7f-1	XXbac-BPG300A18.13
ELMOD2	hsa-let-7b	GAS5	0.0007						POLR3D	hsa-let-7f-1	XXbac-BPG300A18.13
HAUS6	hsa-let-7b	SNHG1	0.0007						GGA3	hsa-let-7f-1	RP11-264B17.3
KPNA5	hsa-let-7b	GAS5	0.0007						GGA3	hsa-let-7d	RP11-264B17.3
LSM6	hsa-let-7b	SNHG1	0.0007						FAM43A	hsa-let-7d	RP11-264B17.3
NAA35	hsa-let-7a-3	SNHG16	0.0007						FAM43A	hsa-let-7f-1	RP11-264B17.3
RAB3GAP2	hsa-let-7b	SNHG16	0.0007						KIAA0930	hsa-let-7f-1	XXbac-BPG300A18.13
TBC1D15	hsa-let-7b	SNHG16	0.0007						IPO9	hsa-let-7f-1	XXbac-BPG300A18.13
ARPP19	hsa-let-7b	SNHG1	0.0009						POLR3D	hsa-let-7f-1	RP11-498P14.3
PDE12	hsa-let-7b	SNHG1	0.0009						NCKIPSD	hsa-let-7f-1	XXbac-BPG300A18.13
SET	hsa-mir-197	SNHG1	0.0009						SLC38A7	hsa-let-7f-1	RP11-264B17.3
SLC25A12	hsa-let-7b	SNHG16	0.0009						SLC38A7	hsa-let-7d	RP11-264B17.3
TAF9	hsa-let-7b	SNHG16	0.0009						C5orf51	hsa-let-7f-1	XXbac-BPG300A18.13
ALDOA	hsa-mir-186	CTD-2587H24.14	0.0011						PBX2	hsa-let-7f-1	RP11-264B17.3
DBT	hsa-mir-197	SNHG1	0.0011						LIMD2	hsa-let-7f-1	RP11-264B17.3
HBP1	hsa-let-7a-3	SNHG16	0.0011						RAB40C	hsa-let-7d	RP11-264B17.3
MGAT4A	hsa-mir-197	SNHG1	0.0011						RAB40C	hsa-let-7f-1	RP11-264B17.3
NCL	hsa-mir-197	SNHG1	0.0011						OPA3	hsa-let-7f-1	XXbac-BPG300A18.13
PRIM2	hsa-let-7b	SNHG1	0.0011						MAP2K7	hsa-let-7f-1	XXbac-BPG300A18.13
RPL7A	hsa-mir-197	SNHG1	0.0011						ITGA3	hsa-let-7f-1	XXbac-BPG300A18.13
RPL9	hsa-let-7a-3	SNHG16	0.0011						ATG9A	hsa-let-7f-1	XXbac-BPG300A18.13
VAV3	hsa-mir-30e	SNHG16	0.0011						RHBDF2	hsa-let-7f-1	RP11-264B17.3
ZNF738	hsa-let-7b	SNHG1	0.0012						NAP1L1	hsa-let-7b	SNHG16
ARHGEF6	hsa-mir-185	SCARNA9	0.0013						KIAA0930	hsa-let-7d	RP11-264B17.3
ECHDC1	hsa-let-7b	SNHG1	0.0013						KIAA0930	hsa-let-7f-1	RP11-264B17.3
HNRNPA1	hsa-mir-197	SNHG1	0.0013						IL6R	hsa-let-7d	RP11-264B17.3
LRRC58	hsa-mir-197	SNHG1	0.0013						IL6R	hsa-let-7f-1	RP11-264B17.3
LZIC	hsa-mir-197	SNHG1	0.0013						MYC	hsa-mir-26a-1	SPECC1L-ADORA2A
ZMYM2	hsa-let-7b	SNHG1	0.0013						SLC5A6	hsa-let-7f-1	RP11-264B17.3
ZNF708	hsa-mir-197	SNHG1	0.0013						BRI3BP	hsa-let-7f-1	XXbac-BPG300A18.13
CCDC186	hsa-let-7b	SNHG1	0.0015						AP1S1	hsa-let-7f-1	RP11-264B17.3
KPNA5	hsa-mir-197	CTC-559E9.4	0.0015						DVL3	hsa-let-7d	RP11-264B17.3
MMS22L	hsa-let-7b	SNHG1	0.0015						DVL3	hsa-let-7f-1	RP11-264B17.3
NAP1L1	hsa-let-7a-3	SNHG16	0.0015						DNAJC28	hsa-let-7f-1	RP11-498P14.3
ELMOD2	hsa-let-7b	MALAT1	0.0017						COX1	hsa-let-7b	MALAT1
PDCD4	hsa-mir-197	CTC-559E9.4	0.0017						OPA3	hsa-let-7f-1	RP11-264B17.3
RNF40	hsa-mir-186	CTD-2587H24.14	0.0017						POLR3D	hsa-let-7f-1	RP11-264B17.3
SP100	hsa-let-7b	SNHG1	0.0017						NCKIPSD	hsa-let-7d	RP11-264B17.3
USP47	hsa-let-7a-3	SNHG16	0.0017						NCKIPSD	hsa-let-7f-1	RP11-264B17.3
KPNA5	hsa-let-7b	MALAT1	0.0018						CALU	hsa-let-7f-2	RP11-227G15.3
ALMS1	hsa-mir-197	SNHG1	0.0019						ASCC3	hsa-let-7b	SNHG16
ANP32E	hsa-let-7b	SNHG1	0.0019						C1RL	hsa-let-7f-1	RP11-264B17.3
CHD1	hsa-mir-30e	SNHG16	0.0019						C2CD2	hsa-mir-320c-1	RP11-400F19.8
HNRNPU	hsa-let-7a-3	SNHG16	0.0019						KCTD21	hsa-let-7d	RP11-264B17.3
KIAA1143	hsa-let-7a-3	SNHG16	0.0019						KCTD21	hsa-let-7f-1	RP11-264B17.3
KRAS	hsa-let-7a-3	SNHG16	0.0019						ATG9A	hsa-let-7f-1	RP11-44M6.7
SFT2D3	hsa-let-7a-3	SNHG16	0.0019						MAP2K7	hsa-let-7f-1	RP11-264B17.3
USP37	hsa-mir-185	SCARNA9	0.0019						MAP2K7	hsa-let-7d	RP11-264B17.3
WDR82	hsa-mir-30e	SNHG16	0.0019						POLL	hsa-let-7f-1	RP11-264B17.3
LLPH	hsa-let-7b	SNHG16	0.002						PLD3	hsa-let-7f-1	RP11-264B17.3
ORC4	hsa-let-7b	SNHG1	0.002						TNRC6B	hsa-mir-21	RAD51L3-RFFL
PGM3	hsa-let-7b	SNHG1	0.002						RUNX2	hsa-mir-30c-1	TMEM256-PLSCR3
RTCA	hsa-let-7b	SNHG1	0.002						PLAGL2	hsa-let-7f-1	XXbac-BPG300A18.13
MIB1	hsa-let-7a-3	SNHG16	0.0021						FAM43A	hsa-let-7f-1	AC135048.13
NIPBL	hsa-let-7a-3	SNHG16	0.0021						FAM43A	hsa-let-7d	AC135048.13
RAP1B	hsa-mir-30e	SNHG16	0.0021						EFHD2	hsa-let-7f-1	RP11-264B17.3
SKI	hsa-mir-2110	FLJ23867	0.0021						MYC	hsa-let-7f-1	XXbac-BPG300A18.13
UBA2	hsa-mir-197	SNHG1	0.0021						TIAF1	hsa-let-7d	RP11-264B17.3
OSCAR	hsa-mir-186	CTD-2587H24.14	0.0022						TNRC6A	hsa-mir-30c-1	AC084018.1
TNKS2	hsa-mir-30e	SNHG16	0.0022						GABPB1	hsa-let-7b	SNHG16
SHOC2	hsa-let-7a-3	SNHG16	0.0023						ECHDC1	hsa-let-7f-2	RP11-227G15.3
CYLD	hsa-mir-197	SNHG1	0.0024						PLXND1	hsa-let-7f-1	RP11-264B17.3
ERGIC2	hsa-let-7b	SNHG1	0.0024						PLXND1	hsa-let-7d	RP11-264B17.3
FAM126B	hsa-mir-30e	SNHG16	0.0024						HMGA2	hsa-let-7f-2	H19
LRRC40	hsa-let-7b	MALAT1	0.0024						SUOX	hsa-let-7f-1	AC135048.13
NAA15	hsa-let-7b	MALAT1	0.0024						SUOX	hsa-let-7f-1	RP11-44M6.7
SFT2D3	hsa-let-7b	SNHG1	0.0024						MIB1	hsa-let-7b	SNHG16
VAT1	hsa-mir-2110	FLJ23867	0.0024						HNRNPDL	hsa-let-7b	SNHG16
ZNF644	hsa-let-7b	GAS5	0.0025						CRY2	hsa-let-7d	RP11-264B17.3
AK3	hsa-mir-197	SNHG1	0.0026						NUCB2	hsa-let-7f-2	RP11-227G15.3
COPS2	hsa-let-7b	GAS5	0.0026						STK11IP	hsa-mir-20a	INO80B-WBP1
COPS8	hsa-mir-30e	SNHG16	0.0026						STK11IP	hsa-mir-17	INO80B-WBP1
DDX18	hsa-let-7b	SNHG1	0.0026						ZBTB4	hsa-mir-17	INO80B-WBP1
FAM210A	hsa-mir-185	SCARNA9	0.0026						ZBTB4	hsa-mir-20a	INO80B-WBP1
GABPB1	hsa-let-7b	SNHG1	0.0026						NOTCH1	hsa-mir-204	SPECC1L-ADORA2A
GOLGA4	hsa-let-7b	GAS5	0.0026						CDV3	hsa-let-7f-2	MALAT1
HNRNPDL	hsa-let-7a-3	SNHG16	0.0026						CDV3	hsa-let-7b	MALAT1
HNRNPU	hsa-mir-30e	SNHG16	0.0026						C19orf47	hsa-let-7d	RP11-264B17.3
KRAS	hsa-mir-30e	SNHG16	0.0026						C19orf47	hsa-let-7f-1	RP11-264B17.3
MBNL1	hsa-let-7b	SNHG1	0.0026						LBR	hsa-let-7b	SNHG16
MDM4	hsa-let-7f-2	RP11-227G15.3	0.0026						H6PD	hsa-mir-30c-1	TMEM256-PLSCR3
SLC4A7	hsa-mir-30e	SNHG16	0.0026						SLC25A44	hsa-mir-20a	INO80B-WBP1
TMEM242	hsa-mir-30e	SNHG16	0.0026						SLC25A44	hsa-mir-17	INO80B-WBP1
TWF1	hsa-mir-30e	SNHG16	0.0026						PDE12	hsa-let-7f-2	TUG1
ZC3H11A	hsa-let-7b	SNHG1	0.0026						NOTCH1	hsa-mir-139	TMX2-CTNND1
ZNF302	hsa-mir-197	SNHG1	0.0026						USP15	hsa-let-7b	SNHG16
ZNF644	hsa-let-7f-2	RP11-227G15.3	0.0026						XIAP	hsa-mir-4793	MALAT1
ALDH3B1	hsa-mir-2110	FLJ23867	0.0027						PVR	hsa-mir-20a	INO80B-WBP1
KIAA0930	hsa-mir-186	CTD-2587H24.14	0.0027						PVR	hsa-mir-17	INO80B-WBP1
AZIN1	hsa-mir-30e	SNHG5	0.0029						ULK1	hsa-mir-320c-1	RP11-400F19.8
DNASE2	hsa-mir-186	CTD-2587H24.14	0.0029						MIB1	hsa-let-7b	GAS5
PPIL3	hsa-let-7b	SNHG1	0.0029						ATG9A	hsa-let-7f-1	RP11-264B17.3
TET3	hsa-mir-2110	RP11-44M6.7	0.0029						AGO1	hsa-let-7f-1	RP11-44M6.7
PARP1	hsa-let-7a-3	SNHG16	0.003						AGO1	hsa-mir-326	RP11-44M6.7
CEP135	hsa-let-7b	SNHG1	0.0032						SF3A1	hsa-let-7f-1	AC135048.13
HMGB1	hsa-mir-4793	SNHG5	0.0032						AGO1	hsa-let-7f-1	XXbac-BPG300A18.13
NCOR2	hsa-mir-2110	FLJ23867	0.0033						CDV3	hsa-let-7b	GAS5
PAXBP1	hsa-let-7a-3	SNHG16	0.0033						FICD	hsa-mir-20a	INO80B-WBP1
RIF1	hsa-mir-223	GAS5	0.0033						FICD	hsa-mir-17	INO80B-WBP1
RPS3	hsa-mir-30e	SNHG16	0.0033						AGO1	hsa-mir-326	TP73-AS1
SUMO1	hsa-let-7a-3	SNHG16	0.0033						AGO1	hsa-mir-194-2	TP73-AS1
HNRNPA3	hsa-mir-4793	SNHG5	0.0034						CDV3	hsa-let-7b	CTB-89H12.4
STK25	hsa-mir-186	CTD-2587H24.14	0.0034						CSF1	hsa-mir-30c-1	AC084018.1
UBXN6	hsa-mir-186	CTD-2587H24.14	0.0034						POLL	hsa-let-7f-1	AC135048.13
CCNG1	hsa-mir-197	SNHG1	0.0035						EPS15L1	hsa-mir-30c-1	INO80B-WBP1
CNOT2	hsa-let-7b	SNHG1	0.0035						WDR33	hsa-let-7b	MALAT1
AATF	hsa-let-7b	SNHG16	0.0036						RNMT	hsa-let-7b	MALAT1
LSM6	hsa-let-7b	GAS5	0.0036						RNMT	hsa-mir-331	MALAT1
ATM	hsa-mir-223	GAS5	0.0037						MDM4	hsa-let-7f-2	TUG1
COX1	hsa-let-7b	SNHG1	0.0037						SLC25A12	hsa-let-7b	SNHG16
MIDN	hsa-mir-2110	FLJ23867	0.0037						ZNF738	hsa-let-7f-2	RP11-227G15.3
PPIL4	hsa-let-7b	GAS5	0.0037						PTAR1	hsa-mir-21	RP11-77H9.2
RIF1	hsa-mir-30e	SNHG5	0.0037						NPM3	hsa-mir-320c-1	RP11-400F19.8
SH3GL1	hsa-mir-30c-2	CTD-2587H24.14	0.0037						FAM43A	hsa-let-7f-1	RP11-44M6.7
ARPP19	hsa-let-7b	GAS5	0.004						BRI3BP	hsa-let-7f-1	RP11-264B17.3
CDKN1B	hsa-let-7a-3	SNHG16	0.004						BRI3BP	hsa-let-7d	RP11-264B17.3
MAP2K7	hsa-let-7f-1	AC135048.13	0.004						MYC	hsa-let-7f-1	RP11-44M6.7
SET	hsa-mir-197	TUG1	0.004						RAB40C	hsa-let-7f-1	RP11-44M6.7
TET3	hsa-mir-2110	MIRLET7BHG	0.004						GGA3	hsa-let-7d	AC135048.13
ATG5	hsa-mir-30e	SNHG5	0.0042						GGA3	hsa-let-7f-1	AC135048.13
CFL1	hsa-mir-2110	FLJ23867	0.0042						LBR	hsa-let-7b	GAS5
GPS1	hsa-let-7f-1	AC135048.13	0.0042						KMT2D	hsa-let-7f-1	RP11-264B17.3
NFIC	hsa-mir-2110	RP11-44M6.7	0.0042						KMT2D	hsa-let-7d	RP11-264B17.3
PDE12	hsa-let-7b	GAS5	0.0042						EDC3	hsa-mir-320c-1	RAD51L3-RFFL
ZNF644	hsa-let-7b	MALAT1	0.0042						MAVS	hsa-mir-20a	INO80B-WBP1
DBT	hsa-mir-197	TUG1	0.0043						MAVS	hsa-mir-17	INO80B-WBP1
HSP90AA1	hsa-mir-185	SCARNA9	0.0043						RNF44	hsa-let-7f-1	AC135048.13
MGAT4A	hsa-mir-197	TUG1	0.0043						SLC5A6	hsa-let-7f-1	AC135048.13
PCMTD1	hsa-let-7f-2	RP11-227G15.3	0.0043						FAM222B	hsa-let-7d	AC135048.13
PDE12	hsa-let-7f-2	RP11-227G15.3	0.0043						FAM222B	hsa-let-7f-1	AC135048.13
SH3GL1	hsa-mir-30c-2	AC084018.1	0.0043						NOTCH1	hsa-mir-30c-1	TMEM256-PLSCR3
SMU1	hsa-mir-4793	SNHG5	0.0043						PPP1R10	hsa-let-7f-1	XXbac-BPG300A18.13
VAT1	hsa-mir-2110	RP11-44M6.7	0.0043						MIDN	hsa-let-7f-1	RP11-264B17.3
NUP62	hsa-mir-186	CTD-2587H24.14	0.0044						ULK1	hsa-mir-320c-1	RAD51L3-RFFL
PRIM2	hsa-let-7b	GAS5	0.0044						DDX6	hsa-mir-331	MALAT1
GOLGA4	hsa-let-7b	MALAT1	0.0045						AP1S1	hsa-let-7f-1	RP11-44M6.7
LSM14A	hsa-mir-30e	SNHG16	0.0045						DVL3	hsa-let-7d	AC135048.13
PLD3	hsa-let-7a-1	AC135048.13	0.0045						DVL3	hsa-let-7f-1	AC135048.13
PRIM2	hsa-let-7f-2	RP11-227G15.3	0.0045						COX1	hsa-let-7b	GAS5
SH3GL1	hsa-mir-30c-2	RP11-802E16.3	0.0045						GOLGA4	hsa-let-7b	SNHG16
SRCAP	hsa-mir-2110	FLJ23867	0.0046						FNDC3A	hsa-let-7f-2	TUG1
BZW1	hsa-let-7b	MALAT1	0.0047						NRBP1	hsa-mir-30c-1	INO80B-WBP1
ECSIT	hsa-mir-186	CTD-2587H24.14	0.0047						BCL9	hsa-mir-30c-1	AC084018.1
GALNT1	hsa-mir-30e	SNHG5	0.0047						POLM	hsa-mir-20a	INO80B-WBP1
SH3BP2	hsa-mir-186	CTD-2587H24.14	0.0047						POLM	hsa-mir-17	INO80B-WBP1
TROVE2	hsa-let-7b	GAS5	0.0047						HSPA1B	hsa-mir-326	CTD-2587H24.14
LZIC	hsa-mir-197	TUG1	0.0048						AGO1	hsa-let-7f-1	AC135048.13
COPS2	hsa-let-7b	MALAT1	0.0049						AGO1	hsa-let-7d	AC135048.13
ZNF738	hsa-let-7b	GAS5	0.0049						MYC	hsa-let-7f-1	RP11-264B17.3
KCTD21	hsa-let-7f-1	AC135048.13	0.005						HMGB1	hsa-let-7b	CTB-89H12.4
NKIRAS2	hsa-mir-2110	FLJ23867	0.005						SRCAP	hsa-mir-194-2	RAD51L3-RFFL
PLD3	hsa-mir-30c-2	CTD-2587H24.14	0.005						RAB40C	hsa-let-7f-1	AC135048.13
ZNF629	hsa-mir-186	CTD-2587H24.14	0.005						RAB40C	hsa-let-7d	AC135048.13
ACAP2	hsa-mir-4793	SNHG5	0.0052						HMGB1	hsa-let-7b	MALAT1
HLX	hsa-mir-2110	FLJ23867	0.0052						ASCC3	hsa-let-7b	MALAT1
HSPE1-MOB4	hsa-let-7f-2	RP11-227G15.3	0.0052						LBR	hsa-let-7b	MALAT1
KIAA0895L	hsa-mir-2110	RP11-44M6.7	0.0052						ZFP36L2	hsa-mir-186	TMX2-CTNND1
MOB4	hsa-let-7f-2	RP11-227G15.3	0.0052						NRBP1	hsa-mir-30c-1	TMEM256-PLSCR3
PLEKHA3	hsa-let-7b	GAS5	0.0052						DNMT1	hsa-mir-152	AC084018.1
ZNF738	hsa-let-7f-2	RP11-227G15.3	0.0052						SHOC2	hsa-let-7b	GAS5
ECHDC1	hsa-let-7f-2	RP11-227G15.3	0.0053						SEC24A	hsa-mir-30c-1	AC016747.3
HSPA1B	hsa-mir-326	CTD-2587H24.14	0.0053						BCL9	hsa-mir-30c-1	TMEM256-PLSCR3
MOB1A	hsa-let-7b	GAS5	0.0053						ZC3H18	hsa-let-7f-1	XXbac-BPG300A18.13
RNMT	hsa-let-7b	GAS5	0.0053						RPS6KA1	hsa-mir-320c-1	ZFP91-CNTF
TET3	hsa-mir-2110	SENP3-EIF4A1	0.0053						AP1S1	hsa-let-7f-1	AC135048.13
ALDH3B1	hsa-mir-2110	RP11-44M6.7	0.0054						PPP1R10	hsa-let-7f-1	RP11-264B17.3
CCDC186	hsa-let-7b	GAS5	0.0054						RABL2A	hsa-let-7f-1	AC135048.13
CHD1	hsa-let-7b	GAS5	0.0054						RABL2A	hsa-let-7d	AC135048.13
FKBP8	hsa-mir-2110	FLJ23867	0.0054						RABL2B	hsa-let-7f-1	AC135048.13
IL6R	hsa-let-7f-1	AC135048.13	0.0054						RABL2B	hsa-let-7d	AC135048.13
MAP7D1	hsa-mir-186	CTD-2587H24.14	0.0054						HMGB1	hsa-let-7b	SNHG16
MMS22L	hsa-let-7b	GAS5	0.0054						NOD2	hsa-mir-320c-1	ZFP91-CNTF
NDUFS2	hsa-let-7a-3	SNHG16	0.0054						SHOC2	hsa-let-7b	SNHG16
PFKFB2	hsa-mir-2110	FLJ23867	0.0054						NOTCH1	hsa-mir-30c-1	AC084018.1
PLD3	hsa-mir-30c-2	AC084018.1	0.0054						PHC3	hsa-mir-197	MALAT1
PLD3	hsa-let-7a-1	RP11-44M6.7	0.0054						AKAP17A	hsa-mir-152	AC084018.1
PPP1R12A	hsa-mir-30e	SNHG16	0.0054						COX2	hsa-let-7b	GAS5
STX7	hsa-mir-4793	SNHG5	0.0054						SRCAP	hsa-mir-204	SPECC1L-ADORA2A
VAV3	hsa-mir-30e	SNHG5	0.0054						COX2	hsa-let-7b	MALAT1
ZMYM2	hsa-let-7b	GAS5	0.0054						TMF1	hsa-mir-331	MALAT1
ARPP19	hsa-mir-30e	SNHG5	0.0056						AGO1	hsa-let-7d	RP11-264B17.3
PLD3	hsa-mir-30c-2	RP11-802E16.3	0.0056						AGO1	hsa-let-7f-1	RP11-264B17.3
TET3	hsa-mir-2110	ADAMTSL4-AS1	0.0056						PIK3C2B	hsa-mir-30c-1	AC084018.1
RHOC	hsa-mir-2110	RP11-197N18.2	0.0057						LIMD2	hsa-let-7f-1	AC135048.13
RRP15	hsa-mir-4793	SNHG5	0.0058						PPP1R10	hsa-let-7f-1	RP11-498P14.3
TPP1	hsa-mir-2110	FLJ23867	0.0058						SLC38A7	hsa-let-7d	AC135048.13
YIPF4	hsa-mir-4793	SNHG5	0.0058						SLC38A7	hsa-let-7f-1	AC135048.13
BRD4	hsa-mir-2110	FLJ23867	0.0059						AGO1	hsa-mir-326	CTD-2587H24.14
HBP1	hsa-let-7b	GAS5	0.0059						CARM1	hsa-mir-194-2	RAD51L3-RFFL
SP100	hsa-let-7b	GAS5	0.0059						AGFG2	hsa-mir-17	INO80B-WBP1
ZNF644	hsa-let-7a-3	GAS5	0.0059						AGFG2	hsa-mir-20a	INO80B-WBP1
ALMS1	hsa-mir-197	TUG1	0.006						EIF4G2	hsa-let-7f-1	RP11-44M6.7
CDKN1B	hsa-mir-30e	SNHG16	0.006						NUCB2	hsa-let-7f-2	TUG1
CNPPD1	hsa-mir-186	CTD-2587H24.14	0.006						NAP1L1	hsa-let-7b	MALAT1
GOLGA4	hsa-let-7a-3	GAS5	0.006						NAP1L1	hsa-mir-331	MALAT1
PYROXD1	hsa-mir-30e	SNHG5	0.006						TNRC6B	hsa-mir-26a-1	SPECC1L-ADORA2A
SEPT7	hsa-mir-223	GAS5	0.006						TNRC6B	hsa-mir-125b-1	SPECC1L-ADORA2A
SLC1A5	hsa-mir-186	CTD-2587H24.14	0.006						ZNF28	hsa-let-7f-2	RP11-227G15.3
VPS41	hsa-mir-30e	SNHG16	0.0061						IPPK	hsa-mir-125a	RP11-66N24.4
FIZ1	hsa-mir-186	CTD-2587H24.14	0.0062						ZFP36L1	hsa-mir-30c-1	TMEM256-PLSCR3
ANP32E	hsa-let-7b	GAS5	0.0063						NRBP1	hsa-mir-30c-1	AC084018.1
ITPR2	hsa-mir-4793	SNHG5	0.0063						KIAA0930	hsa-let-7f-1	RP11-44M6.7
MTDH	hsa-mir-30e	SNHG16	0.0063						FAM43A	hsa-let-7d	FLJ23867
ARPP19	hsa-let-7b	MALAT1	0.0065						ZNRF2	hsa-mir-197	MALAT1
ZNF208	hsa-mir-197	TUG1	0.0065						GAK	hsa-mir-20a	INO80B-WBP1
SKI	hsa-mir-2110	RTEL1-TNFRSF6B	0.0066						GAK	hsa-mir-17	INO80B-WBP1
TRIM37	hsa-mir-30e	SNHG16	0.0066						ATXN2L	hsa-let-7f-1	AC135048.13
WBP1L	hsa-mir-2110	RP11-197N18.2	0.0066						POLL	hsa-mir-204	SPECC1L-ADORA2A
G2E3	hsa-let-7a-3	GAS5	0.0068						CDKN1B	hsa-let-7b	GAS5
MIDN	hsa-mir-2110	RP11-44M6.7	0.0068						HNRNPU	hsa-let-7b	GAS5
PDAP1	hsa-mir-186	CTD-2587H24.14	0.0068						CEP72	hsa-mir-20a	INO80B-WBP1
SET	hsa-mir-197	CTC-559E9.4	0.0068						CEP72	hsa-mir-17	INO80B-WBP1
ZC3H18	hsa-let-7f-1	AC135048.13	0.0068						LARP1	hsa-mir-30c-1	TMEM256-PLSCR3
NAP1L1	hsa-let-7b	GAS5	0.0069						KPNA5	hsa-let-7b	SNHG16
USP15	hsa-let-7b	GAS5	0.0069						CHD1	hsa-let-7b	SNHG16
CALU	hsa-let-7f-2	RP11-227G15.3	0.0071						TRIP12	hsa-let-7b	SNHG16
DBT	hsa-mir-197	CTC-559E9.4	0.0071						FBXL18	hsa-mir-125a	RP11-66N24.4
GGA3	hsa-let-7f-1	AC135048.13	0.0071						KPNA5	hsa-let-7f-2	RP11-227G15.3
MGAT4A	hsa-mir-197	CTC-559E9.4	0.0071						ZNF644	hsa-let-7b	SNHG16
NCOR2	hsa-mir-2110	MIRLET7BHG	0.0071						RHBDF2	hsa-let-7f-1	AC135048.13
SMARCAD1	hsa-let-7f-2	RP11-227G15.3	0.0071						C2CD2	hsa-mir-320c-1	ZFP91-CNTF
SRSF7	hsa-mir-30e	SNHG16	0.0071						RARG	hsa-mir-320c-1	RAD51L3-RFFL
STX7	hsa-let-7f-2	RP11-227G15.3	0.0071						USP47	hsa-let-7b	MALAT1
VAT1	hsa-mir-2110	ADAMTSL4-AS1	0.0071						C1RL	hsa-let-7f-1	RP11-44M6.7
WDR82	hsa-mir-30e	SNHG5	0.0072						H6PD	hsa-mir-30c-1	AC084018.1
CHD1	hsa-mir-30e	SNHG5	0.0073						SOCS7	hsa-let-7f-1	AC135048.13
FNDC3A	hsa-let-7f-2	RP11-227G15.3	0.0073						ASXL2	hsa-mir-30c-1	TMEM256-PLSCR3
SERBP1	hsa-let-7b	GAS5	0.0073						KCTD21	hsa-let-7f-1	RP11-44M6.7
SHOC2	hsa-mir-4793	SNHG5	0.0073						NOTCH1	hsa-mir-326	TP73-AS1
TROVE2	hsa-let-7b	MALAT1	0.0073						PFKFB2	hsa-mir-125a	TMX2-CTNND1
TSEN15	hsa-let-7b	GAS5	0.0073						CIZ1	hsa-let-7d	AC135048.13
ZNF738	hsa-let-7b	MALAT1	0.0073						SHOC2	hsa-let-7b	MALAT1
KIFAP3	hsa-mir-671	MALAT1	0.0074						HNRNPU	hsa-let-7b	SNHG16
NFIC	hsa-mir-2110	RTEL1-TNFRSF6B	0.0074						RNMT	hsa-let-7b	SNHG16
AKT1	hsa-mir-326	CTD-2587H24.14	0.0075						NOTCH1	hsa-mir-139	HYMAI
ATP6AP1	hsa-mir-30c-2	CTD-2587H24.14	0.0075						HSPA1B	hsa-mir-326	RP11-44M6.7
FOPNL	hsa-mir-4793	SNHG5	0.0075						DVL3	hsa-mir-204	SPECC1L-ADORA2A
TSN	hsa-mir-671	MALAT1	0.0075						RPRD2	hsa-mir-21	RP11-77H9.2
VAT1	hsa-mir-2110	RTEL1-TNFRSF6B	0.0075						BRPF3	hsa-let-7f-1	RP11-264B17.3
AKT3	hsa-mir-223	GAS5	0.0076						ZC3H18	hsa-let-7f-1	RP11-264B17.3
PLEKHA3	hsa-let-7b	MALAT1	0.0076						AGO1	hsa-mir-30c-1	TMEM256-PLSCR3
ZNF708	hsa-mir-197	CTC-559E9.4	0.0076						PLXNB2	hsa-mir-186	TMX2-CTNND1
AZIN1	hsa-mir-30e	GAS5	0.0077						RUNX2	hsa-mir-30c-1	AC084018.1
HDGF	hsa-mir-30c-2	CTD-2587H24.14	0.0077						MLEC	hsa-mir-139	HYMAI
CANT1	hsa-mir-132	RP11-2C24.4	0.0078						NFATC1	hsa-mir-204	SPECC1L-ADORA2A
ERGIC2	hsa-let-7b	GAS5	0.0078						POLR3D	hsa-let-7f-1	RP11-44M6.7
LZIC	hsa-mir-197	CTC-559E9.4	0.0078						CCDC186	hsa-let-7b	GAS5
MTF2	hsa-mir-30e	SNHG16	0.0078						NCKIPSD	hsa-let-7d	AC135048.13
NKIRAS2	hsa-mir-2110	RP11-44M6.7	0.0078						NCKIPSD	hsa-let-7f-1	AC135048.13
RPS8	hsa-mir-30e	SNHG16	0.0078						AKT1	hsa-mir-326	INO80B-WBP1
CYLD	hsa-mir-197	TUG1	0.0079						CIZ1	hsa-let-7d	RP11-264B17.3
RNMT	hsa-let-7b	MALAT1	0.008						C1RL	hsa-let-7f-1	AC135048.13
ALDH3B1	hsa-mir-2110	SENP3-EIF4A1	0.0082						CUEDC2	hsa-mir-186	RP11-793H13.8
PPP1R37	hsa-mir-92a-1	RP11-400F19.8	0.0082						ZNF746	hsa-let-7d	RP11-264B17.3
KIAA1143	hsa-let-7b	GAS5	0.0083						MFSD2A	hsa-mir-186	TMX2-CTNND1
MIER1	hsa-mir-30e	SNHG5	0.0083						CNOT2	hsa-let-7b	SNHG1
ATP6AP1	hsa-mir-30c-2	AC084018.1	0.0086						TP53	hsa-mir-2110	MIRLET7BHG
MIDN	hsa-mir-2110	MIRLET7BHG	0.0086						ESYT1	hsa-mir-30c-1	TMEM256-PLSCR3
PKM	hsa-let-7a-1	AC135048.13	0.0086						FASN	hsa-mir-17	INO80B-WBP1
AKT1	hsa-mir-326	RP11-44M6.7	0.0087						COX17	hsa-mir-186	TMX2-CTNND1
DENND4B	hsa-mir-92a-1	RP11-400F19.8	0.0087						SEMA4D	hsa-let-7f-1	XXbac-BPG300A18.13
FKBP8	hsa-mir-2110	RP11-44M6.7	0.0087						PPP1R10	hsa-let-7f-1	AC135048.13
MMS22L	hsa-let-7b	MALAT1	0.0087						CUL3	hsa-let-7b	SNHG16
PLXND1	hsa-let-7f-1	AC135048.13	0.0087						SERBP1	hsa-let-7b	CTB-89H12.4
SH3GL1	hsa-mir-30c-2	HYMAI	0.0087						TP53	hsa-mir-194-2	RP11-77H9.2
TNFRSF10D	hsa-mir-30c-2	AC084018.1	0.0087						KPNA5	hsa-let-7f-2	TUG1
ALDH3B1	hsa-mir-2110	ADAMTSL4-AS1	0.0088						KPNA5	hsa-mir-197	TUG1
CCNT2	hsa-let-7b	GAS5	0.0088						BRI3BP	hsa-mir-30c-1	INO80B-WBP1
CFL1	hsa-mir-2110	MIRLET7BHG	0.0088						YY1	hsa-mir-331	MALAT1
CHD1	hsa-let-7b	MALAT1	0.0088						IQSEC1	hsa-mir-17	INO80B-WBP1
CREM	hsa-mir-30e	SNHG16	0.0088						IQSEC1	hsa-mir-20a	INO80B-WBP1
GABPB1	hsa-let-7b	GAS5	0.0088						ULK1	hsa-mir-320c-1	ZFP91-CNTF
INPPL1	hsa-mir-326	CTD-2587H24.14	0.0088						IL6R	hsa-let-7f-1	AC135048.13
KIAA0895L	hsa-mir-2110	RTEL1-TNFRSF6B	0.0088						IL6R	hsa-let-7d	AC135048.13
KIFAP3	hsa-mir-671	SNHG8	0.0088						IKZF4	hsa-mir-30c-1	AC084018.1
LIMD2	hsa-let-7f-1	AC135048.13	0.0088						IRF2BP2	hsa-let-7f-1	RP11-264B17.3
SP1	hsa-mir-2110	FLJ23867	0.0088						AGO2	hsa-mir-125a	TMX2-CTNND1
ZNF302	hsa-mir-197	TUG1	0.0088						UBE2O	hsa-mir-30c-1	INO80B-WBP1
BRWD1	hsa-mir-221	GAS5	0.0089						ZBTB18	hsa-mir-26a-1	SPECC1L-ADORA2A
ATP6AP1	hsa-mir-30c-2	RP11-802E16.3	0.009						FAM96A	hsa-let-7b	CTB-89H12.4
APPL1	hsa-let-7b	GAS5	0.0092						PRKAB2	hsa-mir-30c-1	TMEM256-PLSCR3
CIAPIN1	hsa-mir-2110	FLJ23867	0.0092						NUCB2	hsa-let-7f-2	MALAT1
HBP1	hsa-let-7b	MALAT1	0.0092						DPP8	hsa-mir-197	MALAT1
HDGF	hsa-mir-30c-2	RP11-802E16.3	0.0092						CREBZF	hsa-let-7b	MALAT1
NCOR2	hsa-mir-2110	SENP3-EIF4A1	0.0092						PRIM2	hsa-let-7b	GAS5
SYF2	hsa-let-7a-3	GAS5	0.0092						AKT2	hsa-mir-21	RP11-77H9.2
ATP2B1	hsa-let-7a-3	GAS5	0.0093						PDAP1	hsa-mir-186	CTD-2587H24.14
CCNT2	hsa-let-7f-2	RP11-227G15.3	0.0093						MAP2K7	hsa-let-7f-1	RP11-44M6.7
HBS1L	hsa-mir-197	CTC-559E9.4	0.0093						MIB1	hsa-let-7b	MALAT1
NIPBL	hsa-let-7b	GAS5	0.0093						TP53	hsa-mir-30c-1	AC084018.1
RIF1	hsa-mir-30e	GAS5	0.0093						GTF2E1	hsa-let-7f-1	RP11-264B17.3
SH3GL1	hsa-mir-30c-2	TP73-AS1	0.0093						ATG9A	hsa-let-7f-1	AC135048.13
TAB2	hsa-let-7f-2	RP11-227G15.3	0.0093						SPCS3	hsa-let-7b	MALAT1
ZNF644	hsa-let-7a-3	MALAT1	0.0093						ZNF644	hsa-let-7f-2	MALAT1
SP100	hsa-let-7b	MALAT1	0.0094						ZNF644	hsa-let-7b	MALAT1
ALDH3B1	hsa-mir-2110	RTEL1-TNFRSF6B	0.0095						KIAA1143	hsa-let-7b	SNHG16
FAM91A1	hsa-mir-30e	SNHG5	0.0095						ZC3H18	hsa-let-7f-1	AC135048.13
NOTCH1	hsa-mir-326	CTD-2587H24.14	0.0095						ITGA3	hsa-let-7f-1	RP11-44M6.7
NUCB2	hsa-let-7f-2	RP11-227G15.3	0.0095						KLHL42	hsa-mir-26a-1	SPECC1L-ADORA2A
SF3B3	hsa-mir-186	CTD-2587H24.14	0.0095						SP100	hsa-let-7b	SNHG1
TPP1	hsa-mir-2110	RP11-44M6.7	0.0095						TSC2	hsa-mir-17	LOC100506472
ZNF644	hsa-let-7a-3	CTB-89H12.4	0.0095						ZSWIM3	hsa-mir-17	LOC100506472
FAM126B	hsa-mir-30e	SNHG5	0.0096						PIK3C2B	hsa-mir-30c-1	TMEM256-PLSCR3
MBNL1	hsa-let-7b	GAS5	0.0096						TGFBR2	hsa-mir-26a-1	SPECC1L-ADORA2A
ZNF805	hsa-let-7b	MALAT1	0.0096						SF3B3	hsa-mir-326	CTD-2587H24.14
FAM208A	hsa-mir-671	MALAT1	0.0097						USP15	hsa-let-7b	MALAT1
GOLGA4	hsa-let-7a-3	MALAT1	0.0098						MED15	hsa-mir-186	TMX2-CTNND1
ACBD5	hsa-mir-223	GAS5	0.0099						OPA3	hsa-let-7f-1	AC135048.13
NCOR2	hsa-mir-2110	ADAMTSL4-AS1	0.0099						RAB5B	hsa-mir-30c-1	AC084018.1
SHOC2	hsa-let-7b	GAS5	0.0099						HSPA1B	hsa-mir-326	RUSC1-AS1
MAT2B	hsa-let-7b	MALAT1	0.01						HNRNPDL	hsa-let-7b	MALAT1
ATG5	hsa-mir-30e	GAS5	0.0101						RARG	hsa-mir-320c-1	RP11-400F19.8
INPPL1	hsa-mir-326	RP11-44M6.7	0.0101						PDE12	hsa-let-7f-2	RP11-227G15.3
PSMD7	hsa-mir-30e	SNHG16	0.0101						SEMA4D	hsa-let-7f-1	RP11-264B17.3
ATE1	hsa-let-7b	GAS5	0.0102						ZNF526	hsa-let-7d	AC135048.13
IPO8	hsa-let-7b	GAS5	0.0102						C19orf47	hsa-let-7d	AC135048.13
ANP32E	hsa-let-7b	MALAT1	0.0103						C19orf47	hsa-let-7f-1	AC135048.13
NKIRAS2	hsa-mir-2110	MIRLET7BHG	0.0103						IKZF4	hsa-mir-30c-1	TMEM256-PLSCR3
ASCC3	hsa-let-7b	GAS5	0.0104						DHX9	hsa-let-7b	MALAT1
GOLGA4	hsa-let-7a-3	CTB-89H12.4	0.0104						MTOR	hsa-mir-125a	TMX2-CTNND1
KIAA0930	hsa-let-7f-1	AC135048.13	0.0104						SFT2D3	hsa-let-7b	SNHG16
MOGAT1	hsa-mir-30e	SNHG16	0.0104						EP300	hsa-mir-30c-1	TMEM256-PLSCR3
PPARGC1B	hsa-mir-186	CTD-2587H24.14	0.0104						EP300	hsa-mir-194-2	RAD51L3-RFFL
RAVER1	hsa-mir-92a-1	RP11-400F19.8	0.0104						SMARCA4	hsa-mir-139	TMX2-CTNND1
HSPA1B	hsa-mir-326	INO80B-WBP1	0.0105						DPF2	hsa-mir-204	SPECC1L-ADORA2A
ZNF813	hsa-mir-197	TUG1	0.0105						DYRK1B	hsa-mir-320c-1	RP11-400F19.8
KRAS	hsa-mir-671	MALAT1	0.0106						CIAPIN1	hsa-mir-139	HYMAI
SLC4A7	hsa-mir-30e	SNHG5	0.0106						MTHFR	hsa-mir-125a	TMX2-CTNND1
YIPF4	hsa-mir-197	CTC-559E9.4	0.0106						CCNG1	hsa-let-7b	GAS5
ALMS1	hsa-mir-197	CTC-559E9.4	0.0107						EP300	hsa-mir-26a-1	SPECC1L-ADORA2A
ARID3A	hsa-let-7f-1	AC135048.13	0.0107						UTRN	hsa-let-7b	GAS5
PPIL3	hsa-let-7b	GAS5	0.0108						ZNF70	hsa-mir-30c-1	INO80B-WBP1
ARRDC1	hsa-mir-326	CTD-2587H24.14	0.0109						PDZD8	hsa-let-7b	GAS5
NCOR2	hsa-mir-2110	RTEL1-TNFRSF6B	0.0109						PDZD8	hsa-mir-223	GAS5
LUC7L2	hsa-mir-30e	SNHG16	0.011						EIF4G2	hsa-let-7f-1	AC135048.13
PPP1R10	hsa-let-7f-1	AC135048.13	0.011						NUCKS1	hsa-let-7b	MALAT1
NOTCH1	hsa-mir-326	RP11-44M6.7	0.0112						AKT2	hsa-mir-21	RAD51L3-RFFL
TAOK2	hsa-mir-92a-1	RP11-400F19.8	0.0112						PRKAG1	hsa-mir-186	TMX2-CTNND1
TWF1	hsa-mir-30e	SNHG5	0.0112						YTHDC1	hsa-let-7b	MALAT1
AMD1	hsa-let-7a-3	GAS5	0.0114						NIPBL	hsa-let-7b	SNHG16
CEP135	hsa-let-7b	GAS5	0.0114						AGO1	hsa-mir-30c-1	INO80B-WBP1
DCAF12	hsa-mir-186	CTD-2587H24.14	0.0114						AGO1	hsa-mir-326	INO80B-WBP1
DOT1L	hsa-mir-92a-1	RP11-400F19.8	0.0114						ZNF644	hsa-let-7f-2	TUG1
FKBP8	hsa-mir-2110	MIRLET7BHG	0.0114						ZFP36L2	hsa-mir-186	RP11-793H13.8
G2E3	hsa-let-7a-3	MALAT1	0.0114						CARM1	hsa-mir-194-2	TP73-AS1
GGA3	hsa-let-7a-1	AC135048.13	0.0114						WDR33	hsa-let-7b	SNHG16
NAA35	hsa-let-7a-3	GAS5	0.0114						CHD1	hsa-let-7b	MALAT1
NOD2	hsa-mir-320c-1	ZFP91-CNTF	0.0114						CCNT2	hsa-let-7f-2	TUG1
RBMXL1	hsa-let-7a-3	GAS5	0.0114						G2E3	hsa-mir-331	MALAT1
SH3GL1	hsa-mir-30c-2	LOC100128288	0.0114						SYF2	hsa-let-7b	CTB-89H12.4
ZNF208	hsa-mir-197	CTC-559E9.4	0.0114						ANKFY1	hsa-mir-186	TMX2-CTNND1
TBC1D15	hsa-let-7b	GAS5	0.0116						MLXIP	hsa-mir-30c-1	AC084018.1
USP15	hsa-let-7b	MALAT1	0.0117						APPL1	hsa-let-7b	GAS5
GALNT1	hsa-mir-30e	GAS5	0.0118						MYC	hsa-mir-30c-1	AC084018.1
RAVER1	hsa-let-7a-1	AC135048.13	0.0118						RBM12B	hsa-let-7b	MALAT1
PLEKHO2	hsa-mir-30c-2	CTD-2587H24.14	0.012						RBM12B	hsa-mir-4793	MALAT1
CNNM4	hsa-mir-326	CTD-2587H24.14	0.0121						SUPT16H	hsa-let-7b	MALAT1
G2E3	hsa-let-7a-3	CTB-89H12.4	0.0121						MYC	hsa-mir-30c-1	TMEM256-PLSCR3
KRAS	hsa-mir-30e	SNHG5	0.0121						MGAT4A	hsa-mir-197	MALAT1
NAP1L1	hsa-let-7b	MALAT1	0.0121						MGAT4A	hsa-mir-564	MALAT1
RAB3GAP2	hsa-let-7b	GAS5	0.0121						MED16	hsa-mir-30c-1	INO80B-WBP1
TMEM242	hsa-mir-30e	SNHG5	0.0121						EIF4A2	hsa-let-7b	MALAT1
ULK1	hsa-mir-320c-1	RP11-400F19.8	0.0121						SF3A1	hsa-let-7f-1	RP11-264B17.3
BAG6	hsa-mir-92a-1	RP11-400F19.8	0.0123						AKT1	hsa-mir-326	RUSC1-AS1
MIDN	hsa-mir-2110	ADAMTSL4-AS1	0.0125						PISD	hsa-mir-125a	TP73-AS1
CAMTA2	hsa-mir-92a-1	RP11-400F19.8	0.0131						CUL3	hsa-let-7b	MALAT1
SYVN1	hsa-let-7a-1	AC135048.13	0.0131						BAP1	hsa-mir-200b	TP73-AS1
UBA2	hsa-mir-197	CTC-559E9.4	0.0131						MDC1	hsa-mir-188	INO80B-WBP1
ARRDC1	hsa-mir-326	RP11-44M6.7	0.0132						ERGIC2	hsa-let-7b	SNHG1
C19orf47	hsa-let-7f-1	AC135048.13	0.0132						DNMT1	hsa-mir-200b	TP73-AS1
NSA2	hsa-let-7b	MALAT1	0.0134						ASCC3	hsa-let-7b	GAS5
SERBP1	hsa-let-7b	MALAT1	0.0134						EFHD2	hsa-let-7f-1	AC135048.13
SLC25A12	hsa-let-7b	GAS5	0.0134						ASB1	hsa-mir-181c	RAD51L3-RFFL
SRCAP	hsa-mir-2110	SENP3-EIF4A1	0.0134						COPB1	hsa-mir-185	SCARNA9
SUOX	hsa-let-7f-1	AC135048.13	0.0134						CRY2	hsa-let-7d	CTC-479C5.10
TAF9	hsa-let-7b	GAS5	0.0134						TLN1	hsa-mir-30c-1	TMEM256-PLSCR3
TSEN15	hsa-let-7b	MALAT1	0.0137						MAP2K7	hsa-let-7f-1	AC135048.13
BRD4	hsa-mir-2110	MIRLET7BHG	0.0141						MAP2K7	hsa-let-7d	AC135048.13
PARVG	hsa-mir-30c-2	CTD-2587H24.14	0.0143						TGFBR2	hsa-mir-21	RAD51L3-RFFL
STS	hsa-mir-2110	FLJ23867	0.0143						RUNX1	hsa-mir-20a	INO80B-WBP1
SHISA5	hsa-mir-92a-1	RP11-400F19.8	0.0145						RUNX1	hsa-mir-17	INO80B-WBP1
AZIN1	hsa-mir-30e	MALAT1	0.0148						KCNK6	hsa-mir-17	INO80B-WBP1
CFL1	hsa-mir-2110	RTEL1-TNFRSF6B	0.0148						KCNK6	hsa-mir-20a	INO80B-WBP1
MINK1	hsa-mir-194-2	RAD51L3-RFFL	0.0148						CCNG1	hsa-let-7b	MALAT1
ATG9A	hsa-let-7f-1	AC135048.13	0.0149						CCNG1	hsa-let-7f-2	MALAT1
DYRK1B	hsa-mir-320c-1	RP11-400F19.8	0.0149						CCNG1	hsa-mir-4793	MALAT1
HBP1	hsa-let-7a-3	GAS5	0.0151						CCNG1	hsa-mir-197	MALAT1
RPL9	hsa-let-7a-3	GAS5	0.0152						TSC22D4	hsa-mir-186	TMX2-CTNND1
RARG	hsa-mir-320c-1	RP11-400F19.8	0.0155						GPS1	hsa-let-7f-1	RP11-264B17.3
ROCK2	hsa-mir-30e	SNHG5	0.0155						RAB3GAP2	hsa-let-7b	SNHG16
VAV3	hsa-mir-30e	GAS5	0.0155						CALU	hsa-let-7f-2	TUG1
GGA3	hsa-let-7a-1	RP11-44M6.7	0.0156						ARRDC1	hsa-mir-326	RUSC1-AS1
GTF2H3	hsa-mir-197	CTC-559E9.4	0.0156						MTOR	hsa-mir-125a	TP73-AS1
MLXIP	hsa-mir-30c-2	CTD-2587H24.14	0.0156						BTF3L4	hsa-mir-197	TUG1
SRCAP	hsa-mir-2110	ADAMTSL4-AS1	0.0156						LZIC	hsa-mir-197	TUG1
CDIPT	hsa-mir-186	CTD-2587H24.14	0.0157						FBXL18	hsa-mir-125a	TP73-AS1
PLXND1	hsa-let-7a-1	AC135048.13	0.0157						ZNF687	hsa-mir-30c-1	AC084018.1
BAHD1	hsa-mir-30c-2	CTD-2587H24.14	0.0158						AGFG2	hsa-mir-17	LOC100506472
FASN	hsa-mir-326	CTD-2587H24.14	0.0158						GRPEL2	hsa-let-7b	SNHG1
PLEKHO2	hsa-mir-30c-2	RP11-802E16.3	0.0158						ANP32E	hsa-let-7b	MALAT1
ZNF28	hsa-let-7f-2	RP11-227G15.3	0.0158						RASSF1	hsa-mir-186	HNRNPUL2-BSCL2
LIMD2	hsa-let-7a-1	AC135048.13	0.0159						CNPPD1	hsa-mir-186	TMX2-CTNND1
MAP2K7	hsa-let-7f-1	XXbac-BPG300A18.13	0.0159						CUEDC2	hsa-mir-186	TMX2-CTNND1
MIDN	hsa-let-7f-1	AC135048.13	0.0159						FAM193A	hsa-mir-326	RUSC1-AS1
POLL	hsa-let-7f-1	AC135048.13	0.0159						GYS1	hsa-mir-326	INO80B-WBP1
RAVER1	hsa-let-7a-1	RP11-44M6.7	0.0159						DUSP18	hsa-mir-194-2	TP73-AS1
GPS1	hsa-let-7f-1	XXbac-BPG300A18.13	0.0161						ST13	hsa-let-7b	CTB-89H12.4
RHBDF2	hsa-let-7f-1	AC135048.13	0.0161						NUCKS1	hsa-let-7b	GAS5
SFT2D3	hsa-let-7b	MALAT1	0.0161						ANKRD40	hsa-mir-30c-1	AC084018.1
USO1	hsa-let-7b	MALAT1	0.0161						HBP1	hsa-let-7b	SNHG16
USP35	hsa-let-7a-1	AC135048.13	0.0161						SERBP1	hsa-let-7b	SNHG16
PLD3	hsa-mir-30c-2	LOC100128288	0.0162						RIOK2	hsa-let-7b	CTB-89H12.4
TNRC18	hsa-mir-92a-1	RP11-400F19.8	0.0162						COX17	hsa-mir-186	HNRNPUL2-BSCL2
ARPP19	hsa-mir-30e	GAS5	0.0163						RAB3GAP2	hsa-let-7b	MALAT1
CIZ1	hsa-mir-326	CTD-2587H24.14	0.0163						MAP3K14	hsa-mir-17	LOC100506472
FKBP8	hsa-mir-2110	SENP3-EIF4A1	0.0163						SERBP1	hsa-let-7b	MALAT1
HCFC1	hsa-mir-92a-1	RP11-400F19.8	0.0163						FAM217B	hsa-mir-21	RP11-77H9.2
HIF1A	hsa-let-7b	GAS5	0.0163						SH3GL1	hsa-mir-2110	ADAMTSL4-AS1
MGAT4A	hsa-mir-564	MALAT1	0.0163						SP100	hsa-let-7b	GAS5
SRCAP	hsa-mir-2110	RTEL1-TNFRSF6B	0.0163						PDZD8	hsa-let-7b	SNHG16
SYVN1	hsa-let-7a-1	RP11-44M6.7	0.0163						PLAGL2	hsa-let-7f-1	AC135048.13
HLX	hsa-mir-2110	ADAMTSL4-AS1	0.0165						C7orf43	hsa-mir-17	LOC100506472
TOR2A	hsa-mir-2110	SENP3-EIF4A1	0.0165						TNF	hsa-mir-17	LOC100506472
AK3	hsa-mir-197	CTC-559E9.4	0.0166						MINK1	hsa-mir-186	TMX2-CTNND1
BAHD1	hsa-mir-30c-2	AC084018.1	0.0166						ZNF738	hsa-let-7b	MALAT1
MAP3K2	hsa-mir-106b	CTB-89H12.4	0.0166						ZNF738	hsa-let-7f-2	MALAT1
MLXIP	hsa-mir-30c-2	AC084018.1	0.0166						PISD	hsa-mir-125a	TMX2-CTNND1
SERINC1	hsa-mir-223	GAS5	0.0166						SF3B3	hsa-mir-326	TP73-AS1
SLC39A1	hsa-mir-30c-2	AC084018.1	0.0166						NOTCH1	hsa-mir-139	RP11-793H13.8
SNRPA	hsa-mir-320c-1	RP11-400F19.8	0.0166						ZNF417	hsa-mir-197	MALAT1
CCNT2	hsa-let-7b	MALAT1	0.0167						CIZ1	hsa-mir-326	RUSC1-AS1
UBE2Q2	hsa-mir-106b	CTB-89H12.4	0.0167						ZNF687	hsa-mir-30c-1	TMEM256-PLSCR3
BRWD1	hsa-mir-221	MALAT1	0.0168						IRAK1	hsa-mir-17	INO80B-WBP1
TMUB1	hsa-mir-92a-1	RP11-400F19.8	0.0168						ARPP19	hsa-let-7b	GAS5
LARP1	hsa-let-7f-1	AC135048.13	0.0171						TRPC4AP	hsa-mir-326	RUSC1-AS1
BCL7B	hsa-mir-320c-1	RP11-400F19.8	0.0172						RTCA	hsa-let-7b	SNHG16
PARVG	hsa-mir-30c-2	RP11-802E16.3	0.0172						ACBD5	hsa-mir-223	GAS5
PLD3	hsa-let-7a-1	XXbac-BPG300A18.13	0.0172						PATZ1	hsa-mir-326	RUSC1-AS1
APPL1	hsa-let-7b	MALAT1	0.0174						SUPT16H	hsa-let-7b	CTB-89H12.4
MYC	hsa-let-7f-1	AC135048.13	0.0174						NPM3	hsa-mir-320c-1	ZFP91-CNTF
NCEH1	hsa-mir-2110	FLJ23867	0.0174						PDS5A	hsa-let-7b	SNHG16
NKIRAS2	hsa-mir-2110	RTEL1-TNFRSF6B	0.0174						DESI1	hsa-mir-30c-1	TMEM256-PLSCR3
RNF44	hsa-let-7f-1	AC135048.13	0.0175						BRI3BP	hsa-let-7f-1	RP11-44M6.7
PYROXD1	hsa-mir-30e	GAS5	0.0176						HSPA1B	hsa-mir-326	INO80B-WBP1
CALU	hsa-let-7f-2	C14orf23	0.0177						TBC1D9B	hsa-let-7d	AC135048.13
FASN	hsa-mir-326	RP11-44M6.7	0.0177						KMT2D	hsa-let-7f-1	AC135048.13
NIPBL	hsa-let-7b	MALAT1	0.0177						KMT2D	hsa-let-7d	AC135048.13
NOTCH1	hsa-mir-30c-2	CTD-2587H24.14	0.0177						IRF2BP2	hsa-let-7f-1	RP11-44M6.7
ZNF302	hsa-mir-197	CTC-559E9.4	0.0177						GAK	hsa-mir-17	LOC100506472
ABCF2	hsa-mir-326	CTD-2587H24.14	0.0178						MYADM	hsa-let-7f-1	RP11-264B17.3
AGO1	hsa-let-7f-1	AC135048.13	0.0178						SLC29A1	hsa-mir-186	RP11-793H13.8
ATP2B1	hsa-let-7a-3	MALAT1	0.0178						HBP1	hsa-let-7b	MALAT1
GOLT1B	hsa-mir-106b	CTB-89H12.4	0.0178						PPP1R10	hsa-let-7f-1	RP11-44M6.7
MLXIP	hsa-mir-30c-2	RP11-802E16.3	0.0178						UTRN	hsa-let-7b	MALAT1
NCKIPSD	hsa-let-7f-1	AC135048.13	0.0178						MLXIP	hsa-mir-30c-1	LOC100128288
RIF1	hsa-mir-30e	MALAT1	0.0178						ARPP19	hsa-let-7b	MALAT1
SLC39A1	hsa-mir-30c-2	RP11-802E16.3	0.0178						ESYT1	hsa-mir-30c-1	AC084018.1
SYF2	hsa-let-7a-3	CTB-89H12.4	0.0178						RUNX2	hsa-mir-204	SPECC1L-ADORA2A
TES	hsa-let-7b	MALAT1	0.0178						SF3B3	hsa-mir-326	INO80B-WBP1
UBA3	hsa-let-7b	MALAT1	0.0178						SEMA4D	hsa-let-7f-1	AC135048.13
ATG14	hsa-mir-671	SNHG3	0.0179						DYRK1B	hsa-mir-320c-1	RAD51L3-RFFL
DVL3	hsa-let-7f-1	AC135048.13	0.0179						PLAGL2	hsa-let-7f-1	RP11-44M6.7
ATG14	hsa-mir-671	MALAT1	0.0181						ABCF2	hsa-mir-326	RP11-44M6.7
BRD4	hsa-mir-2110	SENP3-EIF4A1	0.0181						PBX2	hsa-mir-326	CTD-2587H24.14
PLXND1	hsa-let-7a-1	RP11-44M6.7	0.0181						GABPB1	hsa-let-7b	GAS5
SRCAP	hsa-mir-320c-1	RP11-400F19.8	0.0183						MAP2K7	hsa-let-7d	CTC-479C5.10
AKT3	hsa-mir-221	GAS5	0.0184						SOCS7	hsa-let-7f-1	RP11-44M6.7
C1RL	hsa-let-7f-1	AC135048.13	0.0184						HBP1	hsa-let-7b	GAS5
HIC2	hsa-mir-2110	SENP3-EIF4A1	0.0184						TNRC6A	hsa-mir-30c-1	INO80B-WBP1
KCTD21	hsa-let-7f-1	XXbac-BPG300A18.13	0.0184						MYC	hsa-mir-30c-1	INO80B-WBP1
MBNL1	hsa-let-7b	MALAT1	0.0184						ZNF629	hsa-mir-186	RP11-793H13.8
NAP1L1	hsa-let-7a-3	GAS5	0.0184						DHTKD1	hsa-mir-125a	TMX2-CTNND1
PIP5K1C	hsa-mir-92a-1	RP11-400F19.8	0.0184						RUNX2	hsa-mir-30c-1	INO80B-WBP1
PKM	hsa-let-7a-1	RP11-264B17.3	0.0184						PRKAB2	hsa-mir-30c-1	AC084018.1
PPP1R10	hsa-let-7a-1	AC135048.13	0.0185						PLEKHO2	hsa-mir-17	LOC100506472
SHOC2	hsa-let-7b	MALAT1	0.0185						GYS1	hsa-mir-326	TP73-AS1
USP35	hsa-let-7a-1	RP11-44M6.7	0.0187						EDC3	hsa-mir-320c-1	RP11-400F19.8
AKT1	hsa-mir-326	INO80B-WBP1	0.0189						SH3GL1	hsa-mir-2110	MIRLET7BHG
ATE1	hsa-let-7b	MALAT1	0.0189						CIZ1	hsa-let-7d	FLJ23867
ATG5	hsa-mir-30e	MALAT1	0.0189						MMS22L	hsa-let-7b	SNHG16
CANT1	hsa-mir-132	TMX2-CTNND1	0.0189						TROVE2	hsa-let-7b	SNHG16
CDV3	hsa-let-7b	GAS5	0.0189						CSF1	hsa-mir-30c-1	TMEM256-PLSCR3
DNTTIP2	hsa-mir-25	MALAT1	0.0189						EP300	hsa-mir-30c-1	AC084018.1
IPO8	hsa-let-7b	MALAT1	0.0189						CDKN1B	hsa-let-7b	SNHG16
NOTCH1	hsa-mir-30c-2	AC084018.1	0.0189						STK4	hsa-let-7b	GAS5
VAC14	hsa-mir-30c-2	CTD-2587H24.14	0.0189						KIAA0930	hsa-mir-186	TMX2-CTNND1
ATXN2L	hsa-let-7f-1	AC135048.13	0.0191						NKIRAS2	hsa-mir-2110	MIRLET7BHG
ELF4	hsa-let-7f-1	AC135048.13	0.0201						ZNF738	hsa-let-7b	SNHG1
VPS26A	hsa-mir-106b	CTB-89H12.4	0.0201						DPP8	hsa-mir-197	TUG1
MAST3	hsa-mir-92a-1	RP11-400F19.8	0.0202						BRI3BP	hsa-let-7d	AC135048.13
TRAT1	hsa-mir-197	CTC-559E9.4	0.0202						BRI3BP	hsa-let-7f-1	AC135048.13
SKI	hsa-mir-194-2	RAD51L3-RFFL	0.0205						NOTCH1	hsa-mir-326	RUSC1-AS1
ABCF2	hsa-mir-326	RP11-44M6.7	0.0206						SEMA4D	hsa-let-7f-1	RP11-44M6.7
MARK4	hsa-mir-30c-2	CTD-2587H24.14	0.0208						ZNF738	hsa-let-7f-2	TUG1
ARID3A	hsa-mir-30c-2	CTD-2587H24.14	0.0209						SLC35B4	hsa-mir-182	TUG1
ATP6AP1	hsa-mir-30c-2	HYMAI	0.0209						PNPO	hsa-mir-139	TMX2-CTNND1
ATXN2L	hsa-mir-326	CTD-2587H24.14	0.0209						BCL9	hsa-mir-30c-1	INO80B-WBP1
FASN	hsa-mir-92a-1	RP11-400F19.8	0.0209						SLC25A24	hsa-let-7b	MALAT1
FOSL2	hsa-mir-30c-2	CTD-2587H24.14	0.0209						PDZD8	hsa-let-7b	CTB-89H12.4
GPS1	hsa-mir-423	AC135048.13	0.0209						IDI1	hsa-let-7b	SNHG16
HIC2	hsa-mir-2110	ADAMTSL4-AS1	0.0209						IP6K1	hsa-mir-125a	RP11-66N24.4
NOTCH1	hsa-mir-30c-2	RP11-802E16.3	0.0209						DNMT1	hsa-mir-26a-1	SPECC1L-ADORA2A
RAB40C	hsa-let-7f-1	AC135048.13	0.0209						COPS2	hsa-let-7b	GAS5
SETD1B	hsa-mir-30c-2	CTD-2587H24.14	0.0209						ZNF805	hsa-let-7b	MALAT1
SNAPC4	hsa-mir-30c-2	CTD-2587H24.14	0.0209						WWP2	hsa-mir-26a-1	SPECC1L-ADORA2A
SOCS7	hsa-let-7f-1	AC135048.13	0.0209						LARP1	hsa-mir-30c-1	AC084018.1
TUSC2	hsa-mir-132	RP11-2C24.4	0.0209						RPAP1	hsa-mir-30c-1	AC084018.1
ARFGAP1	hsa-mir-30c-2	CTD-2587H24.14	0.0212						RPAP1	hsa-mir-30c-1	LOC100128288
CORO7	hsa-mir-92a-1	RP11-400F19.8	0.0212						YAE1D1	hsa-let-7f-2	TUG1
HDGF	hsa-mir-30c-2	HYMAI	0.0212						TIAF1	hsa-mir-204	SPECC1L-ADORA2A
IL6R	hsa-let-7f-1	XXbac-BPG300A18.13	0.0212						PCYOX1L	hsa-mir-181c	TP73-AS1
NOTCH1	hsa-mir-139	RP11-793H13.8	0.0212						TRIP12	hsa-let-7b	GAS5
PNPO	hsa-mir-139	HYMAI	0.0212						ELF4	hsa-let-7f-1	RP11-264B17.3
TLN1	hsa-mir-30c-2	CTD-2587H24.14	0.0212						IPPK	hsa-mir-125a	TP73-AS1
TPP1	hsa-mir-2110	RTEL1-TNFRSF6B	0.0212						CBFB	hsa-let-7b	MALAT1
ZNF813	hsa-mir-197	CTC-559E9.4	0.0213						POLR3D	hsa-mir-30c-1	AC084018.1
AMD1	hsa-let-7a-3	MALAT1	0.0214						CDK16	hsa-mir-139	RP11-793H13.8
BRI3BP	hsa-let-7f-1	AC135048.13	0.0214						STK11IP	hsa-mir-17	LOC100506472
AKT1	hsa-mir-326	RUSC1-AS1	0.0215						UBXN6	hsa-mir-186	CTD-2587H24.14
BRD4	hsa-mir-2110	RTEL1-TNFRSF6B	0.0215						PDAP1	hsa-mir-186	HNRNPUL2-BSCL2
ECHDC1	hsa-let-7a-3	CTB-89H12.4	0.0215						SRCAP	hsa-mir-194-2	TP73-AS1
NAA35	hsa-let-7a-3	MALAT1	0.0215						MLEC	hsa-mir-139	TMX2-CTNND1
SLC4A2	hsa-mir-92a-1	RP11-400F19.8	0.0215						STK4	hsa-let-7b	SNHG16
USP47	hsa-let-7a-3	GAS5	0.0215						CSF1	hsa-mir-30c-1	INO80B-WBP1
ATG14	hsa-mir-671	SNHG8	0.0216						SUPT16H	hsa-let-7b	SNHG16
C19orf47	hsa-let-7a-1	AC135048.13	0.0216						TES	hsa-let-7b	SNHG16
CIC	hsa-mir-92a-1	RP11-400F19.8	0.0216						PTAFR	hsa-mir-186	TMX2-CTNND1
PFKL	hsa-mir-423	CTD-2587H24.14	0.0216						MAT2B	hsa-let-7b	MALAT1
TBC1D15	hsa-let-7b	MALAT1	0.0216						GPS1	hsa-let-7f-1	AC135048.13
TNFRSF10D	hsa-mir-30c-2	HYMAI	0.0216						IQSEC1	hsa-mir-17	LOC100506472
GALNT1	hsa-mir-30e	MALAT1	0.0218						UBA1	hsa-mir-17	LOC100506472
GPS1	hsa-mir-423	CTD-2587H24.14	0.0218						NCKIPSD	hsa-mir-30c-1	TMEM256-PLSCR3
UBE2M	hsa-let-7b	MALAT1	0.0218						SLC25A32	hsa-let-7b	SNHG16
WDR82	hsa-mir-30e	GAS5	0.0218						SLC25A32	hsa-let-7b	CTB-89H12.4
HNRNPU	hsa-let-7a-3	GAS5	0.022						INPPL1	hsa-mir-326	INO80B-WBP1
RAB3GAP2	hsa-let-7b	MALAT1	0.0221						EIF1AD	hsa-mir-30c-1	TMEM256-PLSCR3
USP16	hsa-mir-106b	CTB-89H12.4	0.0221						MGAT4A	hsa-mir-197	TUG1
AMD1	hsa-let-7a-3	CTB-89H12.4	0.0222						CDKN1B	hsa-let-7b	MALAT1
CHD1	hsa-mir-30e	GAS5	0.0222						C11orf68	hsa-mir-20a	INO80B-WBP1
E2F3	hsa-mir-2110	RP11-44M6.7	0.0222						BRPF3	hsa-let-7f-1	AC135048.13
KHSRP	hsa-mir-30c-2	AC084018.1	0.0222						PRIM2	hsa-let-7f-2	TUG1
KRAS	hsa-let-7a-3	GAS5	0.0222						COPS2	hsa-let-7b	SNHG1
NAA35	hsa-let-7a-3	CTB-89H12.4	0.0222						YIPF4	hsa-mir-197	MALAT1
MTA1	hsa-mir-30c-2	CTD-2587H24.14	0.0224						YTHDF1	hsa-mir-139	HYMAI
ITPRIPL2	hsa-mir-320c-1	RP11-400F19.8	0.0225						DAGLB	hsa-mir-186	RP11-793H13.8
KIAA1143	hsa-let-7a-3	GAS5	0.0225						UBXN6	hsa-mir-186	RP11-793H13.8
MARK4	hsa-mir-30c-2	AC084018.1	0.0225						ACTA1	hsa-let-7f-2	H19
ARID3A	hsa-mir-30c-2	AC084018.1	0.0227						ATE1	hsa-let-7b	SNHG16
INPPL1	hsa-mir-326	INO80B-WBP1	0.0227						ATE1	hsa-let-7b	GAS5
FOSL2	hsa-mir-30c-2	AC084018.1	0.0228						RBM34	hsa-let-7b	GAS5
VAC14	hsa-mir-30c-2	RP11-802E16.3	0.0228						GABPB1	hsa-let-7b	MALAT1
NCOR2	hsa-mir-30c-2	CTD-2587H24.14	0.0229						CIZ1	hsa-mir-326	TP73-AS1
SETD1B	hsa-mir-30c-2	AC084018.1	0.0229						RARG	hsa-mir-320c-1	ZFP91-CNTF
DHX9	hsa-mir-25	MALAT1	0.0231						PRKAB2	hsa-mir-21	RAD51L3-RFFL
MAFG	hsa-mir-92a-1	RP11-400F19.8	0.0231						GANAB	hsa-mir-17	INO80B-WBP1
PPP1R10	hsa-let-7a-1	RP11-44M6.7	0.0231						APPL1	hsa-let-7b	MALAT1
ZNF224	hsa-mir-671	MALAT1	0.0231						APPL1	hsa-mir-564	MALAT1
ARFGAP1	hsa-mir-30c-2	AC084018.1	0.0232						RRP15	hsa-mir-4793	MALAT1
NPM3	hsa-mir-320c-1	ZFP91-CNTF	0.0232						POM121	hsa-mir-30c-1	AC084018.1
ATG9A	hsa-let-7a-1	AC135048.13	0.0233						NUCKS1	hsa-let-7b	SNHG16
C19orf47	hsa-mir-30c-2	CTD-2587H24.14	0.0233						ZNF629	hsa-mir-186	CTD-2587H24.14
HMGB1	hsa-mir-106b	CTB-89H12.4	0.0233						CEP72	hsa-mir-17	LOC100506472
LLPH	hsa-let-7b	GAS5	0.0233						TBC1D9B	hsa-let-7d	CTC-479C5.10
PGAM4	hsa-mir-139	RP11-793H13.8	0.0233						TNRC6B	hsa-mir-21	RP11-77H9.2
SLC25A12	hsa-let-7b	MALAT1	0.0233						TNRC6B	hsa-mir-125b-1	RP11-77H9.2
TAF9	hsa-let-7b	MALAT1	0.0233						GANAB	hsa-mir-17	LOC100506472
TLN1	hsa-mir-30c-2	AC084018.1	0.0233						WDR13	hsa-mir-139	TMX2-CTNND1
COX2	hsa-let-7b	GAS5	0.0234						HAUS6	hsa-let-7b	SNHG1
HDAC5	hsa-let-7a-1	RP11-44M6.7	0.0234						APEX2	hsa-mir-186	RP11-793H13.8
HSPA1B	hsa-mir-423	AC135048.13	0.0234						FAM193A	hsa-mir-326	INO80B-WBP1
BTBD9	hsa-mir-30e	GAS5	0.0237						UNC13D	hsa-mir-204	SPECC1L-ADORA2A
KLC2	hsa-mir-92a-1	RP11-400F19.8	0.0237						LIMD2	hsa-mir-139	TMX2-CTNND1
HDGF	hsa-mir-30c-2	HNRNPUL2-BSCL2	0.024						FAM219B	hsa-mir-339	SPECC1L-ADORA2A
MARK4	hsa-mir-30c-2	RP11-802E16.3	0.024						CNNM4	hsa-mir-326	RUSC1-AS1
POU2F2	hsa-mir-92a-1	RP11-400F19.8	0.024						PLAGL2	hsa-mir-17	LOC100506472
ARID3A	hsa-mir-30c-2	RP11-802E16.3	0.0241						HMGB1	hsa-let-7b	GAS5
CCNT2	hsa-let-7a-3	GAS5	0.0241						NCKIPSD	hsa-mir-30c-1	AC084018.1
IRF2BP2	hsa-let-7f-1	AC135048.13	0.0243						LARP1	hsa-let-7f-1	AC135048.13
MAST3	hsa-mir-30c-2	CTD-2587H24.14	0.0243						LARP1	hsa-let-7f-1	RP11-264B17.3
MLLT1	hsa-mir-30c-2	CTD-2587H24.14	0.0243						CDK16	hsa-mir-139	HYMAI
TAB2	hsa-let-7a-3	GAS5	0.0243						IDI1	hsa-let-7b	MALAT1
MTA1	hsa-mir-30c-2	AC084018.1	0.0246						ELF4	hsa-let-7f-1	AC135048.13
SETD1B	hsa-mir-30c-2	RP11-802E16.3	0.0246						TANGO2	hsa-mir-30c-1	AC084018.1
CANT1	hsa-mir-132	ZFP91-CNTF	0.0247						IKBKB	hsa-mir-200b	TP73-AS1
GGA3	hsa-let-7a-1	RP11-264B17.3	0.0249						PRIM2	hsa-let-7b	SNHG1
POLL	hsa-let-7a-1	AC135048.13	0.0249						C17orf80	hsa-mir-125b-1	SPECC1L-ADORA2A
ARFGAP1	hsa-mir-30c-2	RP11-802E16.3	0.025						GTF2E1	hsa-let-7f-1	XXbac-BPG300A18.13
DPM2	hsa-mir-30c-2	CTD-2587H24.14	0.0251						AKT1	hsa-mir-326	TP73-AS1
INPPL1	hsa-mir-326	RUSC1-AS1	0.0251						INPPL1	hsa-mir-326	TP73-AS1
MIER1	hsa-mir-30e	GAS5	0.0251						ESYT1	hsa-mir-194-2	TP73-AS1
ZBTB34	hsa-mir-29a	RP11-282O18.3	0.0251						GPS1	hsa-let-7f-1	RP11-44M6.7
COX1	hsa-let-7b	MALAT1	0.0252						CBR1	hsa-mir-186	TMX2-CTNND1
HBP1	hsa-let-7a-3	MALAT1	0.0252						STK4	hsa-let-7b	SNHG1
HSPA1B	hsa-mir-423	CTD-2587H24.14	0.0252						TP53	hsa-mir-30c-1	TMEM256-PLSCR3
NCOR2	hsa-mir-30c-2	AC084018.1	0.0252						STAMBP	hsa-mir-139	TMX2-CTNND1
NIPBL	hsa-let-7a-3	GAS5	0.0252						GRK6	hsa-mir-326	RUSC1-AS1
RPL9	hsa-let-7a-3	MALAT1	0.0252						TTC31	hsa-mir-125a	RP11-66N24.4
ATP13A1	hsa-mir-92a-1	RP11-400F19.8	0.0253						DNAJC10	hsa-mir-185	SCARNA9
EDC3	hsa-mir-320c-1	RP11-400F19.8	0.0253						AGO1	hsa-mir-30c-1	AC084018.1
FLOT2	hsa-mir-423	AC135048.13	0.0253						TRPC4AP	hsa-mir-326	CTD-2587H24.14
MIB1	hsa-let-7a-3	GAS5	0.0253						ZBTB20	hsa-mir-21	RP11-77H9.2
NACC1	hsa-mir-30c-2	RP11-802E16.3	0.0253						STK4	hsa-let-7b	MALAT1
PPP1R12C	hsa-mir-92a-1	RP11-400F19.8	0.0253						ANP32E	hsa-let-7b	GAS5
GNAI2	hsa-mir-30c-2	CTD-2587H24.14	0.0254						YWHAZ	hsa-let-7f-2	RP11-227G15.3
RAVER1	hsa-let-7a-1	RP11-264B17.3	0.0254						PIGS	hsa-mir-17	LOC100506472
C19orf47	hsa-mir-30c-2	AC084018.1	0.0256						UBE2O	hsa-mir-30c-1	RP11-158I13.2
C19orf47	hsa-let-7a-1	RP11-44M6.7	0.0256						GIGYF1	hsa-mir-204	SPECC1L-ADORA2A
HBP1	hsa-let-7a-3	CTB-89H12.4	0.0256						FASN	hsa-mir-17	LOC100506472
HDGF	hsa-mir-423	CTD-2587H24.14	0.0256						TNRC6A	hsa-mir-26a-1	SPECC1L-ADORA2A
PNPO	hsa-mir-139	TMX2-CTNND1	0.0256						ZNF208	hsa-mir-197	TUG1
RAP1B	hsa-mir-30e	GAS5	0.0256						PRKAB2	hsa-mir-30c-1	INO80B-WBP1
RBL1	hsa-mir-22	RP11-298P3.4	0.0256						CBFB	hsa-let-7b	CTB-89H12.4
RPL9	hsa-let-7a-3	CTB-89H12.4	0.0256						UTRN	hsa-let-7b	CTB-89H12.4
TRAF7	hsa-let-7a-1	AC135048.13	0.0256						AGO1	hsa-let-7d	FLJ23867
WIZ	hsa-mir-30c-2	CTD-2587H24.14	0.0256						SLC25A32	hsa-let-7b	MALAT1
CPSF7	hsa-mir-30c-2	CTD-2587H24.14	0.0257						PPP2R1A	hsa-mir-30c-1	AC084018.1
MTA1	hsa-mir-30c-2	RP11-802E16.3	0.0258						EPS15L1	hsa-mir-30c-1	TMEM256-PLSCR3
EEF2	hsa-let-7a-1	AC135048.13	0.0261						CTTNBP2NL	hsa-mir-139	TMX2-CTNND1
FLOT2	hsa-mir-423	CTD-2587H24.14	0.0261						CYLD	hsa-mir-197	MALAT1
LARP1	hsa-let-7a-1	AC135048.13	0.0261						FKBP8	hsa-mir-2110	MIRLET7BHG
MAST3	hsa-mir-30c-2	AC084018.1	0.0261						PPIL3	hsa-let-7b	CTB-89H12.4
NUFIP2	hsa-mir-25	MALAT1	0.0261						APEX2	hsa-mir-186	TMX2-CTNND1
PRR12	hsa-mir-194-2	RAD51L3-RFFL	0.0261						PPP2R1A	hsa-mir-17	LOC100506472
SYVN1	hsa-let-7a-1	RP11-264B17.3	0.0261						FAM96A	hsa-let-7b	MALAT1
TNKS2	hsa-mir-30e	GAS5	0.0261						ZSWIM3	hsa-mir-17	INO80B-WBP1
ARPP19	hsa-mir-30e	MALAT1	0.0262						HNRNPU	hsa-let-7b	MALAT1
NCOR2	hsa-mir-30c-2	RP11-802E16.3	0.0262						SPCS3	hsa-let-7b	SNHG1
ARRDC1	hsa-mir-326	INO80B-WBP1	0.0263						TRPC4AP	hsa-mir-326	TP73-AS1
CSNK1D	hsa-mir-30c-2	CTD-2587H24.14	0.0263						FOXJ2	hsa-mir-17	LOC100506472
HIF1A	hsa-let-7b	MALAT1	0.0263						IRF2BP2	hsa-mir-204	SENP3-EIF4A1
NOTCH1	hsa-mir-326	RUSC1-AS1	0.0263						GAB2	hsa-mir-186	TMX2-CTNND1
RLIM	hsa-mir-25	MALAT1	0.0263						TTC4	hsa-mir-125a	TMX2-CTNND1
SHOC2	hsa-let-7a-3	GAS5	0.0263						TTC4	hsa-mir-186	TMX2-CTNND1
ZNF224	hsa-mir-671	SNHG8	0.0263						TACO1	hsa-mir-30c-1	RP11-158I13.2
SBF1	hsa-mir-30c-2	CTD-2587H24.14	0.0264						LIMK1	hsa-mir-17	LOC100506472
ATP6AP1	hsa-mir-30c-2	LOC100128288	0.0265						YTHDF1	hsa-mir-186	RP11-793H13.8
ATXN2L	hsa-mir-92a-1	RP11-400F19.8	0.0265						YTHDF1	hsa-mir-139	RP11-793H13.8
C2orf68	hsa-mir-197	CTC-559E9.4	0.0265						MTOR	hsa-mir-125a	RP11-66N24.4
DPM2	hsa-mir-30c-2	AC084018.1	0.0265						DVL3	hsa-mir-17	LOC100506472
MYC	hsa-let-7a-1	AC135048.13	0.0265						UNC13D	hsa-mir-204	SENP3-EIF4A1
RNF44	hsa-let-7a-1	AC135048.13	0.0265						GUCD1	hsa-mir-125a	RP11-66N24.4
MINK1	hsa-mir-423	AC135048.13	0.0267						HECTD3	hsa-mir-30c-1	AC084018.1
GNAI2	hsa-mir-30c-2	AC084018.1	0.0268						DSN1	hsa-mir-30c-1	AC084018.1
HECTD3	hsa-mir-30c-2	AC084018.1	0.0268						HEXIM1	hsa-mir-223	GAS5
ZNF267	hsa-mir-25	RP11-618G20.1	0.0268						PVR	hsa-mir-17	LOC100506472
ELF4	hsa-mir-92a-1	RP11-400F19.8	0.027						GRIK3	hsa-let-7f-2	C14orf23
TNFRSF10D	hsa-mir-30c-2	LOC100128288	0.027						C19orf47	hsa-mir-30c-1	AC084018.1
SMARCA4	hsa-mir-139	RP11-793H13.8	0.0271						FBXL18	hsa-mir-139	HYMAI
ATG9A	hsa-let-7a-1	RP11-44M6.7	0.0272						ARRDC1	hsa-mir-326	CTD-2587H24.14
DNTTIP2	hsa-mir-25	RP11-618G20.1	0.0272						CNPPD1	hsa-mir-186	CTD-2587H24.14
NCKIPSD	hsa-let-7a-1	AC135048.13	0.0272						IKZF4	hsa-mir-30c-1	INO80B-WBP1
ZC3H18	hsa-let-7f-1	XXbac-BPG300A18.13	0.0272						UBE2O	hsa-mir-30c-1	AC084018.1
DVL3	hsa-let-7a-1	AC135048.13	0.0273						DSN1	hsa-mir-30c-1	AC016747.3
PRR13	hsa-mir-30c-2	RP11-802E16.3	0.0273						MARK2	hsa-mir-17	LOC100506472
WIZ	hsa-mir-30c-2	AC084018.1	0.0273						BAG5	hsa-let-7b	SNHG16
MAST3	hsa-mir-30c-2	RP11-802E16.3	0.0275						DESI1	hsa-mir-30c-1	AC084018.1
MLLT1	hsa-mir-30c-2	RP11-802E16.3	0.0275						ZBTB4	hsa-mir-17	LOC100506472
KLC2	hsa-mir-30c-2	CTD-2587H24.14	0.0277						SMARCA4	hsa-mir-139	RP11-793H13.8
PKM	hsa-mir-423	AC135048.13	0.0278						ASXL2	hsa-mir-326	RP11-44M6.7
CDC34	hsa-let-7a-1	RP11-44M6.7	0.0279						PNPO	hsa-mir-139	HYMAI
CDKN1B	hsa-mir-30e	SNHG5	0.0279						ASXL2	hsa-mir-30c-1	INO80B-WBP1
PPIL3	hsa-let-7a-3	GAS5	0.0279						ASXL2	hsa-mir-326	INO80B-WBP1
SLC39A6	hsa-mir-139	RP11-793H13.8	0.0279						STK25	hsa-mir-186	CTD-2587H24.14
ZNF543	hsa-mir-30c-2	AC084018.1	0.028						MKNK2	hsa-mir-21	RAD51L3-RFFL
LARP1	hsa-mir-30c-2	CTD-2587H24.14	0.0281						MKNK2	hsa-mir-194-2	RAD51L3-RFFL
SLC35A4	hsa-let-7a-1	AC135048.13	0.0282						NCL	hsa-mir-197	MALAT1
SLC38A7	hsa-mir-30c-2	CTD-2587H24.14	0.0282						SLC25A44	hsa-mir-17	LOC100506472
CNNM4	hsa-mir-326	INO80B-WBP1	0.0283						TIMM10	hsa-mir-186	HNRNPUL2-BSCL2
DPM2	hsa-mir-30c-2	RP11-802E16.3	0.0283						TBC1D13	hsa-mir-181c	RAD51L3-RFFL
FAM126B	hsa-mir-30e	GAS5	0.0283						SMARCAD1	hsa-let-7f-2	TUG1
MINK1	hsa-mir-423	CTD-2587H24.14	0.0283						RREB1	hsa-mir-139	HYMAI
PYROXD1	hsa-mir-30e	MALAT1	0.0283						ARHGEF6	hsa-mir-185	SCARNA9
RBBP6	hsa-mir-195	RP11-96D1.10	0.0283						DSN1	hsa-mir-30c-1	RP11-158I13.2
CSNK1D	hsa-mir-30c-2	AC084018.1	0.0285						RUNX1	hsa-mir-17	LOC100506472
EPS15L1	hsa-mir-30c-2	CTD-2587H24.14	0.0285						ZNF526	hsa-let-7d	FLJ23867
GGA3	hsa-let-7f-1	XXbac-BPG300A18.13	0.0285						FAM193A	hsa-mir-326	TP73-AS1
TMEM161A	hsa-mir-92a-1	RP11-400F19.8	0.0285						TNF	hsa-mir-17	INO80B-WBP1
C7orf43	hsa-mir-30c-2	CTD-2587H24.14	0.0286						SLC38A7	hsa-let-7d	CTC-479C5.10
LIMK1	hsa-mir-30c-2	CTD-2587H24.14	0.0286						CDC37	hsa-mir-139	TMX2-CTNND1
POLL	hsa-let-7a-1	RP11-44M6.7	0.0286						ZNF526	hsa-let-7d	RP11-264B17.3
TSN	hsa-mir-221	MALAT1	0.0286						PDZD8	hsa-let-7b	MALAT1
APPL1	hsa-mir-564	MALAT1	0.0287						LASP1	hsa-mir-125a	TMX2-CTNND1
HECTD3	hsa-mir-30c-2	RP11-802E16.3	0.0287						LMBR1L	hsa-mir-125a	TP73-AS1
HNRNPA1	hsa-mir-221	MALAT1	0.0287						FIBP	hsa-mir-186	HNRNPUL2-BSCL2
SBF1	hsa-mir-30c-2	AC084018.1	0.0288						ST13	hsa-let-7b	SNHG1
ARRDC1	hsa-mir-326	RUSC1-AS1	0.029						PPP2R1A	hsa-mir-20a	INO80B-WBP1
MED16	hsa-mir-30c-1	LOC100128288	0.029						PPP2R1A	hsa-mir-17	INO80B-WBP1
PLXND1	hsa-let-7a-1	RP11-264B17.3	0.029						PPP2R1A	hsa-mir-30c-1	INO80B-WBP1
VPS13C	hsa-mir-106b	CTB-89H12.4	0.029						PBX2	hsa-mir-326	RUSC1-AS1
NKIRAS2	hsa-let-7a-1	AC135048.13	0.0291						CNPPD1	hsa-mir-186	RP11-793H13.8
ZNF687	hsa-mir-30c-2	CTD-2587H24.14	0.0291						STRN3	hsa-mir-564	MALAT1
MTDH	hsa-mir-30e	SNHG5	0.0292						ELMSAN1	hsa-mir-204	SPECC1L-ADORA2A
NFE2L1	hsa-mir-30c-2	CTD-2587H24.14	0.0292						MYO1C	hsa-mir-204	SPECC1L-ADORA2A
TBL1XR1	hsa-mir-106b	CTB-89H12.4	0.0293						MTHFR	hsa-mir-125a	TP73-AS1
ATXN2L	hsa-let-7a-1	AC135048.13	0.0295						AGO1	hsa-mir-326	RUSC1-AS1
CEP170B	hsa-let-7f-2	C14orf23	0.0295						UBE2O	hsa-mir-30c-1	TMEM256-PLSCR3
ULK1	hsa-mir-320c-1	ZFP91-CNTF	0.0295						SLC25A24	hsa-let-7b	CTB-89H12.4
AGO1	hsa-mir-30c-2	CTD-2587H24.14	0.0296						PPP2R1A	hsa-mir-30c-1	TMEM256-PLSCR3
MRPS2	hsa-let-7a-1	AC135048.13	0.0296						BRI3BP	hsa-let-7d	CTC-479C5.10
PPP2R1A	hsa-mir-92a-1	RP11-400F19.8	0.0296						ANKS1A	hsa-mir-125a	RP11-66N24.4
TNPO1	hsa-mir-22	RP11-298P3.4	0.0296						BAG5	hsa-let-7b	MALAT1
CHST15	hsa-mir-30c-2	RP11-802E16.3	0.0297						TROVE2	hsa-let-7b	MALAT1
CPSF7	hsa-mir-30c-2	RP11-802E16.3	0.0297						ZNF251	hsa-mir-30c-1	AC084018.1
LIMD2	hsa-let-7a-1	RP11-264B17.3	0.0297						RASSF1	hsa-mir-186	CTD-2587H24.14
NOP58	hsa-mir-221	GAS5	0.0297						CCND3	hsa-mir-28	CTD-2587H24.14
PPP1R10	hsa-mir-194-2	RAD51L3-RFFL	0.0297						MTHFR	hsa-mir-125a	RP11-66N24.4
RAB5B	hsa-mir-30c-2	CTD-2587H24.14	0.0297						SUMO2	hsa-let-7b	CTB-89H12.4
RBM39	hsa-mir-221	GAS5	0.0297						PIGO	hsa-mir-17	LOC100506472
TRAF7	hsa-let-7a-1	RP11-44M6.7	0.0297						GBA2	hsa-mir-125a	RP11-66N24.4
ZNF543	hsa-mir-30c-2	RP11-802E16.3	0.03						ZNF224	hsa-mir-671	SNHG8
NAP1L1	hsa-let-7a-3	MALAT1	0.0301						ANKS1A	hsa-mir-125a	TMX2-CTNND1
USP35	hsa-let-7a-1	RP11-264B17.3	0.0301						TES	hsa-let-7b	MALAT1
PLEKHO2	hsa-mir-30c-2	HYMAI	0.0302						HDGF	hsa-mir-186	CTD-2587H24.14
AKT3	hsa-mir-221	MALAT1	0.0303						DAGLB	hsa-mir-186	TMX2-CTNND1
H6PD	hsa-mir-30c-2	CTD-2587H24.14	0.0303						FIBP	hsa-mir-186	TMX2-CTNND1
KLC2	hsa-mir-30c-2	AC084018.1	0.0303						UBE2V1	hsa-mir-2110	MIRLET7BHG
PAIP1	hsa-mir-25	MALAT1	0.0303						RALGPS2	hsa-mir-21	RP11-77H9.2
TRIM37	hsa-mir-30e	SNHG5	0.0304						SH3GLB1	hsa-let-7b	MALAT1
NACC1	hsa-mir-194-2	RAD51L3-RFFL	0.0305						TACO1	hsa-mir-30c-1	AC084018.1
SLC4A7	hsa-mir-30e	GAS5	0.0305						TACO1	hsa-mir-30c-1	LOC100128288
COPS8	hsa-mir-30e	GAS5	0.0306						TBC1D9B	hsa-let-7d	RP11-264B17.3
CSNK1D	hsa-mir-30c-2	RP11-802E16.3	0.0306						RALY	hsa-mir-2110	MIRLET7BHG
EEF2	hsa-let-7a-1	RP11-44M6.7	0.0306						TMEM189-UBE2V1	hsa-mir-2110	MIRLET7BHG
C2CD2	hsa-mir-320c-1	RP11-400F19.8	0.0307						DPM2	hsa-mir-30c-1	AC084018.1
LARP1	hsa-mir-30c-2	AC084018.1	0.0307						MED15	hsa-mir-186	RP11-793H13.8
KDM6B	hsa-let-7a-1	RP11-44M6.7	0.0308						SLC5A6	hsa-mir-139	TMX2-CTNND1
LARP1	hsa-let-7a-1	RP11-44M6.7	0.0308						FAM217B	hsa-mir-21	RAD51L3-RFFL
SBF1	hsa-mir-30c-2	RP11-802E16.3	0.0308						TJAP1	hsa-mir-30c-1	AC084018.1
SGSM2	hsa-mir-30c-2	CTD-2587H24.14	0.0308						TMEM189	hsa-mir-2110	MIRLET7BHG
SLC38A7	hsa-mir-30c-2	AC084018.1	0.0308						TIRAP	hsa-mir-125a	TMX2-CTNND1
CDV3	hsa-let-7b	MALAT1	0.031						PLAGL2	hsa-mir-30c-1	INO80B-WBP1
EPS15L1	hsa-mir-30c-2	AC084018.1	0.0311						PLAGL2	hsa-mir-20a	INO80B-WBP1
TBC1D15	hsa-mir-25	MALAT1	0.0311						PLAGL2	hsa-mir-17	INO80B-WBP1
C7orf43	hsa-mir-30c-2	AC084018.1	0.0312						EPS15L1	hsa-mir-30c-1	AC084018.1
CNNM4	hsa-mir-326	RUSC1-AS1	0.0312						MTA1	hsa-mir-125a	RP11-66N24.4
LIMK1	hsa-mir-30c-2	AC084018.1	0.0312						GUCD1	hsa-mir-125a	TMX2-CTNND1
SOCS7	hsa-let-7a-1	AC135048.13	0.0312						ANP32E	hsa-let-7b	SNHG16
MYC	hsa-let-7a-1	RP11-44M6.7	0.0313						ABCF2	hsa-mir-326	INO80B-WBP1
NFE2L1	hsa-mir-30c-2	AC084018.1	0.0313						PPP1CC	hsa-mir-185	SCARNA9
NUP98	hsa-mir-326	CTD-2587H24.14	0.0313						ASXL2	hsa-mir-326	RUSC1-AS1
RAB40C	hsa-let-7a-1	AC135048.13	0.0313						MAT2A	hsa-mir-21	RP11-77H9.2
TWF1	hsa-mir-30e	GAS5	0.0313						SUMO2	hsa-let-7b	SNHG16
ZNF687	hsa-mir-30c-2	AC084018.1	0.0313						RABL2A	hsa-let-7d	FLJ23867
FUK	hsa-mir-92a-1	RP11-400F19.8	0.0316						RABL2B	hsa-let-7d	FLJ23867
AGO1	hsa-mir-30c-2	AC084018.1	0.0317						PTBP1	hsa-mir-17	LOC100506472
IQSEC1	hsa-mir-92a-1	RP11-400F19.8	0.0317						CDK16	hsa-mir-139	TMX2-CTNND1
LMBR1L	hsa-mir-30c-2	CTD-2587H24.14	0.0317						SF3B3	hsa-mir-326	RUSC1-AS1
AKAP17A	hsa-let-7a-1	RP11-44M6.7	0.0319						AMD1	hsa-let-7f-2	MALAT1
NCKIPSD	hsa-let-7a-1	RP11-44M6.7	0.0319						EIF1AD	hsa-mir-30c-1	AC084018.1
RAB5B	hsa-mir-30c-2	AC084018.1	0.0319						C19orf47	hsa-mir-30c-1	TMEM256-PLSCR3
EIF1AD	hsa-mir-30c-2	CTD-2587H24.14	0.032						RANBP6	hsa-let-7b	MALAT1
HNRNPDL	hsa-let-7a-3	GAS5	0.032						ZER1	hsa-mir-30c-1	AC084018.1
KLC2	hsa-mir-30c-2	RP11-802E16.3	0.032						NACC1	hsa-mir-194-2	RAD51L3-RFFL
MAT2B	hsa-mir-106b	CTB-89H12.4	0.032						STARD8	hsa-mir-186	TMX2-CTNND1
PTAR1	hsa-mir-21	HCP5	0.032						CIZ1	hsa-mir-326	INO80B-WBP1
RPS6KA1	hsa-mir-320c-1	ZFP91-CNTF	0.032						DNASE2	hsa-mir-186	CTD-2587H24.14
SH2B3	hsa-mir-92a-1	RP11-400F19.8	0.032						SNRPE	hsa-let-7b	GAS5
CNTRL	hsa-let-7a-3	MALAT1	0.0323						POLR3D	hsa-mir-30c-1	TMEM256-PLSCR3
CPTP	hsa-mir-92a-1	RP11-400F19.8	0.0323						KDELR1	hsa-mir-17	LOC100506472
DNM1L	hsa-mir-106b	CTB-89H12.4	0.0323						PCYOX1L	hsa-mir-181c	RAD51L3-RFFL
DYRK1B	hsa-mir-320c-1	ZFP91-CNTF	0.0323						ZNF251	hsa-mir-30c-1	TMEM256-PLSCR3
FAM193A	hsa-mir-326	CTD-2587H24.14	0.0323						SPECC1	hsa-mir-186	TMX2-CTNND1
FASN	hsa-mir-326	INO80B-WBP1	0.0323						FAM43A	hsa-let-7d	CTC-479C5.10
H6PD	hsa-mir-30c-2	AC084018.1	0.0323						FAM222B	hsa-let-7d	FLJ23867
HNRNPU	hsa-mir-30e	GAS5	0.0323						TP53	hsa-mir-17	LOC100506472
PPP2CA	hsa-mir-671	MALAT1	0.0323						SKI	hsa-mir-2110	MIRLET7BHG
SLC2A6	hsa-mir-92a-1	RP11-400F19.8	0.0323						BAG5	hsa-let-7b	GAS5
DNAJB9	hsa-mir-25	MALAT1	0.0324						COX6A1	hsa-mir-186	HNRNPUL2-BSCL2
EPS15L1	hsa-mir-30c-2	RP11-802E16.3	0.0325						ABCF2	hsa-mir-326	RUSC1-AS1
CSF1	hsa-mir-30c-2	CTD-2587H24.14	0.0326						TIRAP	hsa-mir-125a	RP11-66N24.4
KRAS	hsa-mir-30e	GAS5	0.0326						MOB4	hsa-let-7f-2	TUG1
TMEM242	hsa-mir-30e	GAS5	0.0326						TBC1D15	hsa-let-7b	MALAT1
C7orf43	hsa-mir-30c-2	RP11-802E16.3	0.0327						SLC6A6	hsa-mir-186	RP11-793H13.8
RARG	hsa-mir-320c-1	ZFP91-CNTF	0.0327						TAF9	hsa-let-7b	GAS5
TOPORS	hsa-mir-106b	CTB-89H12.4	0.0327						AGO2	hsa-mir-125a	TP73-AS1
SGSM2	hsa-mir-30c-2	AC084018.1	0.0329						ARL6IP4	hsa-mir-186	HNRNPUL2-BSCL2
ZBTB7B	hsa-mir-18a	RP11-44N21.4	0.0329						ANKRD40	hsa-mir-30c-1	TMEM256-PLSCR3
ZFP36L1	hsa-mir-30c-2	CTD-2587H24.14	0.0329						GUCD1	hsa-mir-125a	SPECC1L-ADORA2A
SLC35A4	hsa-let-7a-1	RP11-44M6.7	0.0331						POLL	hsa-mir-204	SENP3-EIF4A1
KMT2D	hsa-mir-30c-2	CTD-2587H24.14	0.0332						PDE12	hsa-let-7b	SNHG1
CIAPIN1	hsa-mir-2110	RTEL1-TNFRSF6B	0.0334						DHTKD1	hsa-mir-125a	TP73-AS1
PARVG	hsa-mir-30c-2	HYMAI	0.0334						ZNF689	hsa-mir-326	RUSC1-AS1
MTA1	hsa-mir-125a	TP73-AS1	0.0335						LARP1	hsa-mir-17	LOC100506472
SRSF7	hsa-mir-30e	SNHG5	0.0335						SPIN1	hsa-mir-21	RP11-77H9.2
TOR1AIP2	hsa-let-7a-3	CTB-89H12.4	0.0335						DHTKD1	hsa-mir-125a	RP11-66N24.4
TUT1	hsa-mir-193a	TP73-AS1	0.0335						PPIL4	hsa-let-7b	GAS5
ZNF687	hsa-mir-30c-2	RP11-802E16.3	0.0335						ZBTB7A	hsa-mir-17	LOC100506472
GYS1	hsa-mir-326	CTD-2587H24.14	0.0336						PRIM2	hsa-let-7f-2	MALAT1
PATZ1	hsa-mir-326	RP11-44M6.7	0.0337						PRIM2	hsa-let-7b	MALAT1
CIZ1	hsa-mir-326	INO80B-WBP1	0.0339						ANKRD40	hsa-mir-30c-1	INO80B-WBP1
PLXND1	hsa-let-7f-1	XXbac-BPG300A18.13	0.0339						ABCF2	hsa-mir-326	CTD-2587H24.14
SKI	hsa-mir-23b	RAD51L3-RFFL	0.0339						R3HDM4	hsa-mir-28	CTD-2587H24.14
AGO1	hsa-mir-30c-2	RP11-802E16.3	0.0342						TLN1	hsa-mir-30c-1	AC084018.1
NKIRAS2	hsa-let-7a-1	RP11-44M6.7	0.0342						AKR1A1	hsa-mir-186	HNRNPUL2-BSCL2
TLN1	hsa-mir-193a	RP11-793H13.8	0.0342						TBL3	hsa-mir-186	TMX2-CTNND1
USP47	hsa-let-7a-3	MALAT1	0.0342						MED16	hsa-mir-30c-1	AC084018.1
NFKB2	hsa-mir-423	AC135048.13	0.0343						ATP8B1	hsa-mir-197	MALAT1
PBX2	hsa-let-7f-1	AC135048.13	0.0343						PIK3C2B	hsa-mir-30c-1	INO80B-WBP1
BRI3BP	hsa-mir-30c-2	CTD-2587H24.14	0.0344						RAB5B	hsa-mir-204	SPECC1L-ADORA2A
PLAGL2	hsa-let-7f-1	AC135048.13	0.0344						OSCAR	hsa-mir-186	CTD-2587H24.14
BAK1	hsa-mir-30c-2	CTD-2587H24.14	0.0345						SETD1B	hsa-mir-30c-1	AC084018.1
HIST2H2AA3	hsa-mir-671	SNHG8	0.0345						ZNF687	hsa-mir-30c-1	INO80B-WBP1
MLXIP	hsa-mir-30c-2	HYMAI	0.0345						DPM2	hsa-mir-30c-1	TMEM256-PLSCR3
WDR82	hsa-mir-30e	MALAT1	0.0345						CHIC2	hsa-mir-197	TUG1
LMBR1L	hsa-mir-30c-2	AC084018.1	0.0346						IRF2BP2	hsa-let-7f-1	AC135048.13
MRPS2	hsa-let-7a-1	RP11-44M6.7	0.0346						PISD	hsa-mir-125a	RP11-66N24.4
ZDHHC20	hsa-mir-30e	GAS5	0.0346						TJAP1	hsa-mir-30c-1	TMEM256-PLSCR3
CHD1	hsa-mir-30e	MALAT1	0.0349						TRPC4AP	hsa-mir-326	INO80B-WBP1
CRTC2	hsa-mir-92a-1	RP11-400F19.8	0.0349						GYS1	hsa-mir-326	CTD-2587H24.14
EIF1AD	hsa-mir-30c-2	AC084018.1	0.0349						PTPN6	hsa-mir-186	CTD-2587H24.14
H6PD	hsa-mir-30c-2	RP11-802E16.3	0.0349						APPL1	hsa-mir-564	SNHG16
IKZF4	hsa-mir-30c-2	CTD-2587H24.14	0.0349						APPL1	hsa-let-7b	SNHG16
LIMD2	hsa-let-7f-1	XXbac-BPG300A18.13	0.0349						CDC73	hsa-mir-197	MALAT1
KRAS	hsa-let-7a-3	MALAT1	0.035						SP100	hsa-let-7b	MALAT1
USP47	hsa-let-7a-3	CTB-89H12.4	0.035						DPM2	hsa-mir-125a	RP11-66N24.4
NOTCH1	hsa-mir-139	HYMAI	0.0351						PLAGL2	hsa-mir-30c-1	TMEM256-PLSCR3
GGA3	hsa-mir-423	AC135048.13	0.0354						RTCA	hsa-let-7b	SNHG1
PCIF1	hsa-let-7a-1	AC135048.13	0.0354						MMS22L	hsa-let-7b	MALAT1
SGSM2	hsa-mir-30c-2	RP11-802E16.3	0.0354						AGO2	hsa-mir-204	SENP3-EIF4A1
SFT2D3	hsa-let-7a-3	MALAT1	0.0355						MBD5	hsa-mir-200b	RP1-59M18.2
CSF1	hsa-mir-30c-2	AC084018.1	0.0356						RAB40C	hsa-let-7d	CTC-479C5.10
HNRNPU	hsa-let-7a-3	CTB-89H12.4	0.0356						CREBZF	hsa-let-7b	SNHG16
DNTTIP2	hsa-mir-106b	CTB-89H12.4	0.0359						ZER1	hsa-mir-30c-1	TMEM256-PLSCR3
FASN	hsa-mir-326	RUSC1-AS1	0.0359						YTHDF1	hsa-mir-139	TMX2-CTNND1
HDAC5	hsa-let-7a-1	RP11-264B17.3	0.0359						YTHDF1	hsa-mir-186	TMX2-CTNND1
KIAA1143	hsa-let-7a-3	CTB-89H12.4	0.0359						RAB11B	hsa-mir-139	RP11-793H13.8
KMT2D	hsa-mir-30c-2	AC084018.1	0.0359						IPO8	hsa-let-7b	SNHG16
KRAS	hsa-let-7a-3	CTB-89H12.4	0.0359						IL6R	hsa-let-7d	CTC-479C5.10
MTF2	hsa-mir-30e	SNHG5	0.0359						MKNK2	hsa-mir-194-2	TP73-AS1
NFKB2	hsa-mir-423	CTD-2587H24.14	0.0359						PHF12	hsa-mir-188	INO80B-WBP1
PBX2	hsa-mir-326	CTD-2587H24.14	0.0359						TTC4	hsa-mir-125a	TP73-AS1
RPAP1	hsa-mir-30c-2	CTD-2587H24.14	0.0359						TSN	hsa-mir-671	RMRP
RPS6KB2	hsa-mir-193a	RP11-793H13.8	0.0359						LMBR1L	hsa-mir-125a	RP11-66N24.4
SOCS7	hsa-let-7a-1	RP11-44M6.7	0.0359						IDI1	hsa-let-7b	CTB-89H12.4
TPCN1	hsa-mir-23b	TP73-AS1	0.0359						SETDB1	hsa-mir-152	AC084018.1
TTLL12	hsa-mir-18a	RP11-44N21.4	0.0359						MOB1A	hsa-mir-564	MALAT1
CDK16	hsa-mir-139	RP11-793H13.8	0.0361						MOB1A	hsa-let-7b	MALAT1
RPS8	hsa-mir-30e	SNHG5	0.0361						SFT2D3	hsa-let-7b	MALAT1
FKBP8	hsa-let-7a-1	RP11-44M6.7	0.0362						TANGO2	hsa-mir-30c-1	TMEM256-PLSCR3
RAB40C	hsa-let-7a-1	RP11-44M6.7	0.0362						PLXND1	hsa-let-7d	CTC-479C5.10
RLIM	hsa-mir-25	RP11-618G20.1	0.0363						PGAM4	hsa-mir-139	TMX2-CTNND1
SFT2D3	hsa-let-7a-3	CTB-89H12.4	0.0363						TTC31	hsa-mir-125a	SPECC1L-ADORA2A
CIZ1	hsa-mir-326	RUSC1-AS1	0.0365						PLXNB2	hsa-mir-186	CTD-2587H24.14
COX2	hsa-let-7b	MALAT1	0.0365						KIAA0930	hsa-mir-186	CTD-2587H24.14
DPM2	hsa-mir-125a	TP73-AS1	0.0365						ARPP19	hsa-let-7b	SNHG16
LLPH	hsa-let-7b	MALAT1	0.0365						LASP1	hsa-mir-125a	TP73-AS1
NDRG1	hsa-mir-423	AC135048.13	0.0365						HBS1L	hsa-mir-197	TUG1
SEMA4D	hsa-let-7a-1	AC135048.13	0.0365						CS	hsa-mir-200b	TP73-AS1
TACO1	hsa-mir-30c-2	CTD-2587H24.14	0.0365						TJAP1	hsa-mir-194-2	RAD51L3-RFFL
ABCF2	hsa-mir-326	INO80B-WBP1	0.0367						GGPS1	hsa-let-7b	MALAT1
ASXL2	hsa-mir-326	CTD-2587H24.14	0.0367						DPM2	hsa-mir-125a	TP73-AS1
BAHD1	hsa-mir-30c-2	TP73-AS1	0.0367						MKNK2	hsa-mir-17	LOC100506472
BAK1	hsa-mir-30c-2	AC084018.1	0.0367						CDC25B	hsa-mir-204	SPECC1L-ADORA2A
BCL7B	hsa-mir-320c-1	ZFP91-CNTF	0.0367						MYADM	hsa-let-7f-1	AC135048.13
BRI3BP	hsa-mir-30c-2	AC084018.1	0.0367						CNNM4	hsa-mir-326	INO80B-WBP1
EIF4G2	hsa-let-7f-1	AC135048.13	0.0367						USP45	hsa-let-7f-2	RP11-227G15.3
GGA3	hsa-mir-423	CTD-2587H24.14	0.0367						SLC25A6	hsa-mir-139	TMX2-CTNND1
GRK6	hsa-mir-326	RUSC1-AS1	0.0367						OSCAR	hsa-mir-186	TMX2-CTNND1
GYS1	hsa-mir-326	RP11-44M6.7	0.0367						MIDN	hsa-mir-2110	MIRLET7BHG
IPPK	hsa-mir-139	RP11-793H13.8	0.0367						TJAP1	hsa-mir-194-2	RP11-77H9.2
MED29	hsa-mir-92a-1	RP11-400F19.8	0.0367						SYF2	hsa-let-7b	GAS5
NCEH1	hsa-mir-2110	MIRLET7BHG	0.0367						SMN1	hsa-mir-21	RP11-77H9.2
PIGS	hsa-mir-92a-1	RP11-400F19.8	0.0367						RPS6KA4	hsa-mir-2110	MIRLET7BHG
RAB11B	hsa-mir-139	RP11-793H13.8	0.0367						SLC25A6	hsa-mir-139	HYMAI
ROCK2	hsa-mir-30e	GAS5	0.0367						CCDC186	hsa-let-7b	SNHG16
CCNT2	hsa-let-7a-3	MALAT1	0.0368						RNF40	hsa-mir-186	CTD-2587H24.14
IKZF4	hsa-mir-30c-2	AC084018.1	0.0368						CNNM4	hsa-mir-194-2	TP73-AS1
RPS3	hsa-mir-30e	GAS5	0.0368						CNNM4	hsa-mir-326	TP73-AS1
STRIP1	hsa-mir-30c-2	CTD-2587H24.14	0.0368						ZNF224	hsa-mir-671	SNHG3
UNC13D	hsa-mir-204	SENP3-EIF4A1	0.0368						TANGO2	hsa-mir-30c-1	INO80B-WBP1
PPP2CA	hsa-mir-671	SNHG8	0.0369						PTPN6	hsa-mir-186	RP11-793H13.8
PAXBP1	hsa-let-7a-3	GAS5	0.037						MIDN	hsa-mir-17	LOC100506472
PLEKHO2	hsa-mir-30c-2	LOC100128288	0.037						BRI3BP	hsa-mir-30c-1	AC084018.1
CSF1	hsa-mir-30c-2	RP11-802E16.3	0.0373						KMT2D	hsa-mir-30c-1	AC084018.1
TAB2	hsa-let-7a-3	MALAT1	0.0373						BTBD9	hsa-let-7b	GAS5
ZSCAN22	hsa-mir-30c-2	CTD-2587H24.14	0.0373						FBXL18	hsa-mir-125a	TMX2-CTNND1
CCNG1	hsa-let-7a-3	GAS5	0.0374						FBXL18	hsa-mir-139	TMX2-CTNND1
PTGES2	hsa-let-7a-1	RP11-44M6.7	0.0374						OSCAR	hsa-mir-186	RP11-793H13.8
ZFP36L1	hsa-mir-30c-2	RP11-802E16.3	0.0374						SRCAP	hsa-mir-204	SENP3-EIF4A1
KMT2D	hsa-mir-30c-2	RP11-802E16.3	0.0375						NOC3L	hsa-mir-21	RP11-77H9.2
NRBP1	hsa-mir-30c-2	CTD-2587H24.14	0.0375						MTA1	hsa-mir-125a	TP73-AS1
SLC35C1	hsa-mir-30c-2	CTD-2587H24.14	0.0375						CEP170B	hsa-let-7f-2	H19
TESK1	hsa-mir-92a-1	RP11-400F19.8	0.0376						DNASE2	hsa-mir-186	TMX2-CTNND1
UCK1	hsa-mir-326	RP11-44M6.7	0.0376						SLC30A7	hsa-mir-185	SCARNA9
CUX1	hsa-mir-92a-1	RP11-400F19.8	0.0377						NCOR2	hsa-mir-20a	INO80B-WBP1
EDC3	hsa-mir-30c-2	CTD-2587H24.14	0.0378						LASP1	hsa-mir-125a	RP11-66N24.4
C19orf47	hsa-let-7a-1	RP11-264B17.3	0.0379						ECSIT	hsa-mir-186	CTD-2587H24.14
IRF2BPL	hsa-mir-193a	RP11-793H13.8	0.0379						H6PD	hsa-mir-30c-1	INO80B-WBP1
MIB1	hsa-let-7a-3	MALAT1	0.0379						AGO1	hsa-let-7d	CTC-479C5.10
NIPBL	hsa-let-7a-3	MALAT1	0.0379						DSN1	hsa-mir-30c-1	TMEM256-PLSCR3
NOTCH1	hsa-mir-30c-2	HYMAI	0.0379						ZNF70	hsa-mir-30c-1	TMEM256-PLSCR3
OXR1	hsa-mir-106b	CTB-89H12.4	0.0379						MGAT4A	hsa-mir-197	JPX
PSMA2	hsa-let-7a-3	CTB-89H12.4	0.0379
RPAP1	hsa-mir-30c-2	AC084018.1	0.0379
TMPPE	hsa-mir-30c-2	RP11-802E16.3	0.0379
TP53	hsa-mir-30c-2	CTD-2587H24.14	0.0379
AGO1	hsa-mir-320c-1	ZFP91-CNTF	0.038
SYNE3	hsa-mir-132	RP11-2C24.4	0.038
SRCAP	hsa-mir-320c-1	ZFP91-CNTF	0.0382
BAK1	hsa-mir-30c-2	RP11-802E16.3	0.0384
SF3B3	hsa-mir-326	CTD-2587H24.14	0.0387
TACO1	hsa-mir-30c-2	AC084018.1	0.0387
ABCA2	hsa-mir-320c-1	RP11-400F19.8	0.0389
IKZF4	hsa-mir-30c-2	RP11-802E16.3	0.0389
KIAA0930	hsa-let-7f-1	XXbac-BPG300A18.13	0.0389
NIPBL	hsa-let-7a-3	CTB-89H12.4	0.0389
PBX2	hsa-mir-326	RP11-44M6.7	0.0389
RAP1B	hsa-mir-30e	MALAT1	0.0389
SHMT2	hsa-let-7a-1	AC135048.13	0.0389
TMED5	hsa-let-7a-3	MALAT1	0.0389
DESI1	hsa-mir-30c-2	RP11-802E16.3	0.039
MIB1	hsa-let-7a-3	CTB-89H12.4	0.039
MMP17	hsa-mir-423	AC135048.13	0.039
MYO18A	hsa-mir-30c-2	AC084018.1	0.039
MEPCE	hsa-let-7a-1	AC135048.13	0.0391
ARID3A	hsa-let-7f-1	XXbac-BPG300A18.13	0.0392
ABCF2	hsa-mir-326	RUSC1-AS1	0.0393
STRIP1	hsa-mir-30c-2	AC084018.1	0.0393
COBLL1	hsa-mir-21	HCP5	0.0396
TNKS2	hsa-mir-30e	MALAT1	0.0396
TUSC2	hsa-mir-132	TMX2-CTNND1	0.0396
ERGIC2	hsa-mir-106b	CTB-89H12.4	0.0397
PPP1R10	hsa-let-7f-1	XXbac-BPG300A18.13	0.0397
SAMD4B	hsa-let-7a-1	RP11-264B17.3	0.0398
IL21R	hsa-mir-30c-2	CTD-2587H24.14	0.0399
LIMD2	hsa-mir-139	TMX2-CTNND1	0.0399
NRBP1	hsa-mir-30c-2	AC084018.1	0.0399
SHOC2	hsa-let-7a-3	MALAT1	0.0399
SLC35C1	hsa-mir-30c-2	AC084018.1	0.0399
TMED5	hsa-let-7a-3	CTB-89H12.4	0.0399
TRIM28	hsa-mir-423	CTD-2587H24.14	0.0399
TUBB	hsa-mir-320c-1	RP11-400F19.8	0.0399
ZNF324	hsa-mir-423	AC135048.13	0.0399
ASXL2	hsa-mir-326	RP11-44M6.7	0.04
PCIF1	hsa-let-7a-1	RP11-44M6.7	0.04
PHLPP2	hsa-mir-195	RP11-96D1.10	0.04
RPAP1	hsa-mir-30c-2	RP11-802E16.3	0.04
SRCAP	hsa-mir-194-2	RAD51L3-RFFL	0.04
ATG9A	hsa-let-7a-1	RP11-264B17.3	0.0401
CDV3	hsa-let-7a-3	GAS5	0.0401
EDC3	hsa-mir-30c-2	AC084018.1	0.0401
NOTCH1	hsa-mir-139	TMX2-CTNND1	0.0401
PLXND1	hsa-mir-423	AC135048.13	0.0403
PPP1R10	hsa-let-7a-1	RP11-498P14.3	0.0403
TP53	hsa-mir-30c-2	AC084018.1	0.0403
DEGS1	hsa-let-7a-3	GAS5	0.0404
GGA3	hsa-let-7a-1	XXbac-BPG300A18.13	0.0404
VAC14	hsa-mir-30c-2	HYMAI	0.0406
FBXL18	hsa-mir-125a	TP73-AS1	0.0408
LASP1	hsa-mir-23b	RAD51L3-RFFL	0.0408
NFIC	hsa-mir-18a	CTD-2517M22.14	0.0408
ATXN2	hsa-let-7f-1	AC135048.13	0.0409
FLII	hsa-mir-423	AC135048.13	0.0409
SHOC2	hsa-let-7a-3	CTB-89H12.4	0.0409
CDC34	hsa-let-7a-1	RP11-264B17.3	0.041
MLXIP	hsa-mir-30c-2	LOC100128288	0.041
PI4KB	hsa-mir-23b	RAD51L3-RFFL	0.041
RXRA	hsa-mir-423	AC135048.13	0.0411
SEMA4D	hsa-let-7a-1	RP11-44M6.7	0.0411
CDC25B	hsa-let-7a-1	AC135048.13	0.0412
ARRB2	hsa-mir-423	AC135048.13	0.0413
AGO2	hsa-let-7a-1	RP11-44M6.7	0.0414
RAVER1	hsa-let-7a-1	XXbac-BPG300A18.13	0.0414
SLC39A1	hsa-mir-30c-2	LOC100128288	0.0414
STRIP1	hsa-mir-30c-2	RP11-802E16.3	0.0414
WIPF2	hsa-mir-423	AC135048.13	0.0414
ZNF324	hsa-mir-423	CTD-2587H24.14	0.0414
ZSCAN22	hsa-mir-30c-2	RP11-802E16.3	0.0416
FAM91A1	hsa-mir-30e	MALAT1	0.0417
MED29	hsa-mir-30c-2	CTD-2587H24.14	0.0418
POLL	hsa-let-7a-1	RP11-264B17.3	0.0418
SGTB	hsa-mir-106b	CTB-89H12.4	0.0419
ZNF770	hsa-mir-106b	CTB-89H12.4	0.0421
LETM1	hsa-mir-30c-2	CTD-2587H24.14	0.0423
NRBP1	hsa-mir-30c-2	RP11-802E16.3	0.0423
SLC35C1	hsa-mir-30c-2	RP11-802E16.3	0.0423
CDKN1B	hsa-let-7a-3	GAS5	0.0424
DDB1	hsa-mir-30c-2	AC084018.1	0.0424
ADD1	hsa-mir-320c-1	RP11-400F19.8	0.0425
FAM126B	hsa-mir-30e	MALAT1	0.0425
DUSP22	hsa-mir-139	RP11-793H13.8	0.0426
DRAP1	hsa-mir-423	AC135048.13	0.0428
EDC3	hsa-mir-30c-2	RP11-802E16.3	0.0428
IL21R	hsa-mir-30c-2	AC084018.1	0.0428
SNX6	hsa-let-7a-3	CTB-89H12.4	0.0428
TP53	hsa-mir-30c-2	RP11-802E16.3	0.0428
GABPB1	hsa-mir-106b	CTB-89H12.4	0.0429
DPM2	hsa-mir-125a	RP11-158I13.2	0.043
FLII	hsa-mir-423	CTD-2587H24.14	0.0431
MYC	hsa-mir-21	HCP5	0.0431
PPIL3	hsa-let-7a-3	CTB-89H12.4	0.0432
ARRB2	hsa-mir-423	CTD-2587H24.14	0.0433
ATG4C	hsa-let-7a-3	CTB-89H12.4	0.0433
C11orf24	hsa-mir-92a-1	RP11-400F19.8	0.0433
C19orf47	hsa-let-7f-1	XXbac-BPG300A18.13	0.0433
HNRNPD	hsa-mir-221	GAS5	0.0433
MTFR1L	hsa-let-7a-1	RP11-44M6.7	0.0433
TRAF7	hsa-let-7a-1	RP11-264B17.3	0.0433
PAK4	hsa-mir-18a	RP11-44N21.4	0.0435
ATXN2L	hsa-mir-326	RUSC1-AS1	0.0436
NF2	hsa-mir-326	CTD-2587H24.14	0.0439
WIPF2	hsa-mir-423	CTD-2587H24.14	0.044
MLF2	hsa-mir-423	CTD-2587H24.14	0.0441
PBX2	hsa-mir-92a-1	RP11-400F19.8	0.0442
CMTM3	hsa-mir-132	RP11-2C24.4	0.0445
NACC1	hsa-mir-30c-2	HYMAI	0.0445
SLC39A6	hsa-mir-139	HYMAI	0.0445
DRAP1	hsa-mir-423	CTD-2587H24.14	0.0446
EEF2	hsa-let-7a-1	RP11-264B17.3	0.0446
FAM210A	hsa-mir-106b	CTB-89H12.4	0.0446
HNRNPUL1	hsa-let-7f-1	AC135048.13	0.0446
KDM6B	hsa-let-7a-1	RP11-264B17.3	0.0446
NOP58	hsa-mir-221	MALAT1	0.0446
NOP58	hsa-mir-221	RP11-661A12.4	0.0446
PSMD11	hsa-mir-92a-1	RP11-400F19.8	0.0446
RBM39	hsa-mir-221	MALAT1	0.0446
RBM39	hsa-mir-221	RP11-661A12.4	0.0446
RNF149	hsa-mir-25	MALAT1	0.0446
SHMT2	hsa-let-7a-1	RP11-44M6.7	0.0446
SRCAP	hsa-mir-204	SENP3-EIF4A1	0.0446
SUOX	hsa-let-7f-1	XXbac-BPG300A18.13	0.0446
LARP1	hsa-let-7a-1	RP11-264B17.3	0.0447
NFATC1	hsa-mir-204	SENP3-EIF4A1	0.0447
SOD2	hsa-mir-671	MALAT1	0.0447
IPPK	hsa-mir-125a	TP73-AS1	0.045
C7orf55-LUC7L2	hsa-mir-30e	SNHG5	0.0453
LUC7L2	hsa-mir-30e	SNHG5	0.0453
MEPCE	hsa-let-7a-1	RP11-44M6.7	0.0453
ZFYVE16	hsa-mir-106b	CTB-89H12.4	0.0453
IL21R	hsa-mir-30c-2	RP11-802E16.3	0.0454
MED29	hsa-mir-30c-2	AC084018.1	0.0454
PXN	hsa-mir-139	TMX2-CTNND1	0.0454
SLC4A7	hsa-mir-30e	MALAT1	0.0454
DSN1	hsa-mir-30c-2	CTD-2587H24.14	0.0457
U2AF2	hsa-mir-423	CTD-2587H24.14	0.0457
LETM1	hsa-mir-30c-2	AC084018.1	0.0459
DPM2	hsa-mir-30c-1	LOC100128288	0.046
EXOSC2	hsa-mir-30c-2	AC084018.1	0.046
MYC	hsa-let-7a-1	RP11-264B17.3	0.046
MTA1	hsa-mir-30c-2	HYMAI	0.0461
PGAM4	hsa-mir-423	AC135048.13	0.0461
RLIM	hsa-mir-106b	CTB-89H12.4	0.0461
RNF44	hsa-let-7a-1	RP11-264B17.3	0.0461
SETD1B	hsa-mir-30c-2	TP73-AS1	0.0462
FAM222B	hsa-let-7a-1	RP11-44M6.7	0.0463
ATG9A	hsa-let-7f-1	XXbac-BPG300A18.13	0.0464
ERI1	hsa-mir-30c-2	RP11-802E16.3	0.0464
ESYT1	hsa-mir-30c-2	CTD-2587H24.14	0.0464
LSM14A	hsa-mir-30e	GAS5	0.0464
ARFGAP1	hsa-mir-30c-2	TP73-AS1	0.0466
NOTCH1	hsa-mir-30c-2	LOC100128288	0.0466
AKAP17A	hsa-let-7a-1	RP11-264B17.3	0.0467
NCKIPSD	hsa-let-7a-1	RP11-264B17.3	0.0467
NCOR2	hsa-mir-30c-2	HYMAI	0.0467
LRCH4	hsa-mir-423	AC135048.13	0.0468
TTC9C	hsa-mir-30c-2	AC084018.1	0.0468
PARP16	hsa-let-7a-1	AC135048.13	0.0469
MRPS18B	hsa-mir-320c-1	RP11-400F19.8	0.047
SMN1	hsa-mir-21	HCP5	0.047
DNMT1	hsa-mir-30c-2	CTD-2587H24.14	0.0471
DVL3	hsa-let-7a-1	RP11-264B17.3	0.0471
AGO2	hsa-mir-132	RP11-2C24.4	0.0472
HNRNPDL	hsa-let-7a-3	MALAT1	0.0472
NKRF	hsa-mir-326	RP11-44M6.7	0.0472
PBX2	hsa-let-7a-1	AC135048.13	0.0472
PLXND1	hsa-let-7a-1	XXbac-BPG300A18.13	0.0472
TUSC2	hsa-mir-132	ZFP91-CNTF	0.0472
VAC14	hsa-mir-423	CTD-2587H24.14	0.0472
TMUB1	hsa-mir-423	AC135048.13	0.0473
ZNF101	hsa-mir-197	CTC-559E9.4	0.0473
CDC25B	hsa-let-7a-1	RP11-44M6.7	0.0474
LETM1	hsa-mir-30c-2	RP11-802E16.3	0.0476
PGAM1	hsa-mir-423	CTD-2587H24.14	0.0476
SLC35A4	hsa-let-7a-1	RP11-264B17.3	0.0476
FHOD1	hsa-mir-423	CTD-2587H24.14	0.0478
MIDN	hsa-let-7f-1	XXbac-BPG300A18.13	0.0478
NF2	hsa-mir-326	RP11-44M6.7	0.0478
ZYX	hsa-mir-423	AC135048.13	0.0478
ARFGAP1	hsa-mir-423	AC135048.13	0.0479
BPNT1	hsa-mir-30c-2	AC084018.1	0.0479
DSN1	hsa-mir-30c-2	AC084018.1	0.0479
KMT2B	hsa-mir-423	CTD-2587H24.14	0.0479
KRAS	hsa-mir-30e	MALAT1	0.0479
LIMD2	hsa-let-7a-1	XXbac-BPG300A18.13	0.0479
MTA1	hsa-mir-30c-2	TP73-AS1	0.0479
TRIP12	hsa-mir-106b	CTB-89H12.4	0.048
MAST3	hsa-mir-30c-2	HYMAI	0.0481
USP35	hsa-let-7a-1	XXbac-BPG300A18.13	0.0481
LRCH4	hsa-mir-423	CTD-2587H24.14	0.0482
RHBDF2	hsa-let-7f-1	XXbac-BPG300A18.13	0.0482
NKIRAS2	hsa-let-7a-1	RP11-264B17.3	0.0483
ZC3H7B	hsa-mir-193a	RP11-793H13.8	0.0483
CHURC1	hsa-mir-106b	CTB-89H12.4	0.0484
EPN1	hsa-mir-423	CTD-2587H24.14	0.0484
LRRC41	hsa-mir-18a	CTD-2517M22.14	0.0484
ZER1	hsa-mir-30c-2	AC084018.1	0.0484
ATXN2L	hsa-let-7a-1	RP11-264B17.3	0.0485
PRRC2A	hsa-mir-423	AC135048.13	0.0485
ZNF609	hsa-let-7a-1	RP11-44M6.7	0.0485
DPM2	hsa-mir-30c-2	HYMAI	0.0486
ESYT1	hsa-mir-30c-2	AC084018.1	0.0486
MRPS2	hsa-let-7a-1	RP11-264B17.3	0.0486
TMUB1	hsa-mir-423	CTD-2587H24.14	0.0486
SMARCA4	hsa-mir-139	TMX2-CTNND1	0.0488
HECTD3	hsa-mir-30c-2	HYMAI	0.0489
UPF1	hsa-mir-423	CTD-2587H24.14	0.0491
DNMT1	hsa-mir-30c-2	AC084018.1	0.0493
TTC4	hsa-mir-125a	TP73-AS1	0.0493
ZYX	hsa-mir-423	CTD-2587H24.14	0.0494
ARFGAP1	hsa-mir-423	CTD-2587H24.14	0.0495
C19orf47	hsa-mir-23b	RAD51L3-RFFL	0.0495
ZDHHC20	hsa-mir-30e	MALAT1	0.0495
KDM2A	hsa-mir-30c-2	CTD-2587H24.14	0.0496
MTA1	hsa-mir-423	AC135048.13	0.0496
TP53	hsa-mir-194-2	RAD51L3-RFFL	0.0496
TUBB	hsa-mir-92a-1	RP11-400F19.8	0.0496
WIZ	hsa-mir-30c-2	HYMAI	0.0496
ZBTB7B	hsa-mir-18a	CTD-2517M22.14	0.0496
AKT1	hsa-mir-326	RP4-622L5.2	0.0499
DGCR2	hsa-mir-23b	RAD51L3-RFFL	0.0499
LARP1	hsa-let-7f-1	XXbac-BPG300A18.13	0.0499
NACC1	hsa-mir-18a	CTD-2517M22.14	0.0499
PER2	hsa-mir-30c-2	CTD-2587H24.14	0.0499
SLC39A6	hsa-mir-139	TMX2-CTNND1	0.0499
