# Supplementary material for: Systematic analysis of lncRNA and microRNA dynamic features reveals diagnostic and prognostic biomarkers of myocardial infarction
Source: Aging (Albany NY). 2020 Jan 12;12(1):945–64. doi: 10.18632/aging.102667 (PMC6977700; doi:10.18632/aging.102667)
Supplement: Supplementary Table 4 [file aging-12-102667-s001..xlsx]

## Sheet: Our method
Significantly enriched subpathways of all dysregulated LmiRM-CTs obtained using our method
Subpathway_ID	Pathway name	p-value
path:04151_6	PI3K-Akt signaling pathway	1.07e-07
path:04150_3	mTOR signaling pathway	1.55e-05
path:04810_14	Regulation of actin cytoskeleton	4.26e-05
path:04510_11	Focal adhesion	6.36e-05
path:04010_11	MAPK signaling pathway	0.000117037
path:05200_19	Pathways in cancer	0.000176423
path:04666_4	Fc gamma R-mediated phagocytosis	0.000251758
path:00010_5	Glycolysis / Gluconeogenesis	0.000377223
path:04066_5	HIF-1 signaling pathway	0.00047035
path:04110_12	Cell cycle	0.000503504
path:05212_4	Pancreatic cancer	0.000578756
path:04210_5	Apoptosis	0.0011656
path:04670_13	Leukocyte transendothelial migration	0.00119201
path:04062_6	Chemokine signaling pathway	0.00120458
path:04350_1	TGF-beta signaling pathway	0.00139697
path:00310_4	Lysine degradation	0.00139697
path:05220_4	Chronic myeloid leukemia	0.00162529
path:05221_4	Acute myeloid leukemia	0.00162529
path:05161_26	Hepatitis B	0.0023005
path:05214_10	Glioma	0.0023005
path:00260_4	Glycine, serine and threonine metabolism	0.0029664
path:04664_4	Fc epsilon RI signaling pathway	0.00316342
path:04360_15	Axon guidance	0.00359752
path:04722_8	Neurotrophin signaling pathway	0.00359752
path:05160_11	Hepatitis C	0.00359752
path:04914_5	Progesterone-mediated oocyte maturation	0.00378375
path:05145_9	Toxoplasmosis	0.00430454
path:05164_6	Influenza A	0.00430454
path:04310_6	Wnt signaling pathway	0.00466089
path:04728_5	Dopaminergic synapse	0.00466089
path:04380_1	Osteoclast differentiation	0.00509001
path:00270_2	Cysteine and methionine metabolism	0.00509001
path:05210_10	Colorectal cancer	0.00595619
path:04720_4	Long-term potentiation	0.00675116
path:05223_2	Non-small cell lung cancer	0.00690515
path:04115_1	p53 signaling pathway	0.00723663
path:04730_5	Long-term depression	0.00793871
path:05215_4	Prostate cancer	0.00793871
path:04910_7	Insulin signaling pathway	0.00883822
path:04012_6	ErbB signaling pathway	0.0090585
path:04660_5	T cell receptor signaling pathway	0.0090585
path:04662_3	B cell receptor signaling pathway	0.0090585
path:04630_2	Jak-STAT signaling pathway	0.0091196
path:04370_6	VEGF signaling pathway	0.0115622
path:04070_2	Phosphatidylinositol signaling system	0.0127437
path:04141_5	Protein processing in endoplasmic reticulum	0.012922
path:05218_3	Melanoma	0.0129484
path:04912_3	GnRH signaling pathway	0.0144253
path:00562_10	Inositol phosphate metabolism	0.0150273
path:00030_3	Pentose phosphate pathway	0.0159936
path:00051_10	Fructose and mannose metabolism	0.0159936
path:05166_17	HTLV-I infection	0.017654
path:04530_8	Tight junction	0.019231
path:05134_9	Legionellosis	0.019231
path:05142_11	Chagas disease (American trypanosomiasis)	0.019231
path:04973_1	Carbohydrate digestion and absorption	0.0227773
path:04270_6	Vascular smooth muscle contraction	0.0265694
path:04540_3	Gap junction	0.0265694
path:04144_10	Endocytosis	0.0305963
path:05152_17	Tuberculosis	0.0305963
path:00920_1	Sulfur metabolism	0.0305963
path:05222_1	Small cell lung cancer	0.034847
path:03015_5	mRNA surveillance pathway	0.0367564
path:04060_41	Cytokine-cytokine receptor interaction	0.0393288
path:05162_17	Measles	0.0393288
path:05202_5	Transcriptional misregulation in cancer	0.0393288
path:05203_3	Viral carcinogenesis	0.0393288
path:04064_7	NF-kappa B signaling pathway	0.0439788
path:05169_11	Epstein-Barr virus infection	0.0439788
path:00240_7	Pyrimidine metabolism	0.0447644
path:03013_20	RNA transport	0.0488399
path:05213_4	Endometrial cancer	0.0488399

## Sheet: Traditional method
Significantly enriched subpathways of all dysregulated LmiRM-CTs obtained using traditional method
Subpathway_ID	Pathway name	p-value
path:04151_6	PI3K-Akt signaling pathway	1.06e-07
path:05220_4	Chronic myeloid leukemia	3.31e-06
path:04010_11	MAPK signaling pathway	3.55e-06
path:05215_5	Prostate cancer	4.27e-06
path:04150_3	mTOR signaling pathway	5.27e-06
path:04210_3	Apoptosis	6.15e-06
path:05164_6	Influenza A	6.15e-06
path:05200_10	Pathways in cancer	1.1e-05
path:05214_10	Glioma	1.74e-05
path:04910_6	Insulin signaling pathway	2.06e-05
path:04660_2	T cell receptor signaling pathway	8.5e-05
path:04380_6	Osteoclast differentiation	0.000100344
path:04630_2	Jak-STAT signaling pathway	0.000119042
path:04064_4	NF-kappa B signaling pathway	0.000183192
path:00270_2	Cysteine and methionine metabolism	0.000183192
path:05222_4	Small cell lung cancer	0.000415732
path:05212_2	Pancreatic cancer	0.00058843
path:05203_1	Viral carcinogenesis	0.000799207
path:04066_3	HIF-1 signaling pathway	0.000806687
path:05221_4	Acute myeloid leukemia	0.000806687
path:05223_1	Non-small cell lung cancer	0.000934792
path:05166_17	HTLV-I infection	0.00107656
path:04110_12	Cell cycle	0.00147653
path:05161_26	Hepatitis B	0.00158101
path:04664_4	Fc epsilon RI signaling pathway	0.00159145
path:04310_6	Wnt signaling pathway	0.00207271
path:05160_11	Hepatitis C	0.0021036
path:04914_5	Progesterone-mediated oocyte maturation	0.00260636
path:00900_5	Terpenoid backbone biosynthesis	0.00260636
path:04510_17	Focal adhesion	0.00299148
path:04920_10	Adipocytokine signaling pathway	0.00299148
path:05169_10	Epstein-Barr virus infection	0.00299148
path:04115_1	p53 signaling pathway	0.00327181
path:05162_18	Measles	0.00386709
path:04662_1	B cell receptor signaling pathway	0.00407888
path:03018_9	RNA degradation	0.00535521
path:04012_6	ErbB signaling pathway	0.00537792
path:04062_11	Chemokine signaling pathway	0.00537792
path:04620_3	Toll-like receptor signaling pathway	0.00689891
path:04330_1	Notch signaling pathway	0.00734358
path:00310_4	Lysine degradation	0.00774537
path:04930_2	Type II diabetes mellitus	0.00865042
path:04722_12	Neurotrophin signaling pathway	0.00912496
path:04114_8	Oocyte meiosis	0.0106395
path:04621_1	NOD-like receptor signaling pathway	0.0106395
path:05142_1	Chagas disease (American trypanosomiasis)	0.0106395
path:05145_13	Toxoplasmosis	0.0111072
path:04710_1	Circadian rhythm	0.0128716
path:04530_8	Tight junction	0.013429
path:05134_9	Legionellosis	0.013429
path:04666_10	Fc gamma R-mediated phagocytosis	0.0140802
path:04622_9	RIG-I-like receptor signaling pathway	0.0159413
path:04973_1	Carbohydrate digestion and absorption	0.0159413
path:04144_10	Endocytosis	0.0215097
path:05152_17	Tuberculosis	0.0215097
path:05120_5	Epithelial cell signaling in Helicobacter pylori infection	0.0277597
path:03015_11	mRNA surveillance pathway	0.0325913
path:04060_41	Cytokine-cytokine receptor interaction	0.0325913
path:04070_3	Phosphatidylinositol signaling system	0.0325913
path:04672_12	Intestinal immune network for IgA production	0.0325913
path:05150_15	Staphylococcus aureus infection	0.0325913
path:03013_20	RNA transport	0.0346412
path:04650_7	Natural killer cell mediated cytotoxicity	0.0346412
path:05213_4	Endometrial cancer	0.0346412
path:04728_7	Dopaminergic synapse	0.037598
path:05210_10	Colorectal cancer	0.0383038
path:00510_9	N-Glycan biosynthesis	0.0383038
path:04360_4	Axon guidance	0.0421065
path:04810_14	Regulation of actin cytoskeleton	0.0442253
path:05131_5	Shigellosis	0.0460439
path:04140_4	Regulation of autophagy	0.0484873
path:04514_45	Cell adhesion molecules (CAMs)	0.0484873
path:05012_1	Parkinson's disease	0.0484873
path:05219_3	Bladder cancer	0.0484873

## Sheet: Specific subpathways
Significantly enriched subpathways that were specific to our method				Significantly enriched subpathways that were specific to traditional method
Subpathway_ID	Pathway name	p-value		Subpathway_ID	Pathway name	p-value
path:00010_5	Glycolysis / Gluconeogenesis	0.000377223		path:00900_5	Terpenoid backbone biosynthesis	0.00260636
path:04670_13	Leukocyte transendothelial migration	0.00119201		path:04920_10	Adipocytokine signaling pathway	0.00299148
path:04350_1	TGF-beta signaling pathway	0.00139697		path:03018_9	RNA degradation	0.00535521
path:00260_4	Glycine, serine and threonine metabolism	0.0029664		path:04620_3	Toll-like receptor signaling pathway	0.00689891
path:04720_4	Long-term potentiation	0.00675116		path:04330_1	Notch signaling pathway	0.00734358
path:04730_5	Long-term depression	0.00793871		path:04930_2	Type II diabetes mellitus	0.00865042
path:04370_6	VEGF signaling pathway	0.0115622		path:04621_1	NOD-like receptor signaling pathway	0.0106395
path:04141_5	Protein processing in endoplasmic reticulum	0.012922		path:04114_8	Oocyte meiosis	0.0106395
path:05218_3	Melanoma	0.0129484		path:04710_1	Circadian rhythm	0.0128716
path:04912_3	GnRH signaling pathway	0.0144253		path:04622_9	RIG-I-like receptor signaling pathway	0.0159413
path:00562_10	Inositol phosphate metabolism	0.0150273		path:05120_5	Epithelial cell signaling in Helicobacter pylori infection	0.0277597
path:00051_10	Fructose and mannose metabolism	0.0159936		path:04672_12	Intestinal immune network for IgA production	0.0325913
path:00030_3	Pentose phosphate pathway	0.0159936		path:05150_15	Staphylococcus aureus infection	0.0325913
path:04540_3	Gap junction	0.0265694		path:04650_7	Natural killer cell mediated cytotoxicity	0.0346412
path:04270_6	Vascular smooth muscle contraction	0.0265694		path:00510_9	N-Glycan biosynthesis	0.0383038
path:00920_1	Sulfur metabolism	0.0305963		path:05131_5	Shigellosis	0.0460439
path:05202_5	Transcriptional misregulation in cancer	0.0393288		path:05219_3	Bladder cancer	0.0484873
path:00240_7	Pyrimidine metabolism	0.0447644		path:04514_45	Cell adhesion molecules (CAMs)	0.0484873
				path:05012_1	Parkinson's disease	0.0484873
				path:04140_4	Regulation of autophagy	0.0484873
