# Supplementary material for: Systematic analysis of lncRNA and microRNA dynamic features reveals diagnostic and prognostic biomarkers of myocardial infarction
Source: Aging (Albany NY). 2020 Jan 12;12(1):945–64. doi: 10.18632/aging.102667 (PMC6977700; doi:10.18632/aging.102667)
Supplement: Supplementary Table 5 [file aging-12-102667-s004..xlsx]

## Sheet: Stage1
The identified 3126 dysregulated LmiRM-CTs in stage 1 of MI (1 day of MI) using our method
mRNA	miRNA	lncRNA	p-value
HLX	hsa-mir-2110	FLJ23867	0
KPNA5	hsa-mir-197	CTC-559E9.4	0
KPNA5	hsa-mir-197	SNHG1	0
S100A9	hsa-mir-132	TMX2-CTNND1	0
TET3	hsa-mir-2110	FLJ23867	0
TNFRSF10D	hsa-mir-30c-2	AC084018.1	0
TNFRSF10D	hsa-mir-30c-2	LOC100128288	0
TNFRSF10D	hsa-mir-30c-2	RP11-158I13.2	0
ALDH3B1	hsa-mir-2110	FLJ23867	0.0001
NKIRAS2	hsa-mir-2110	FLJ23867	0.0001
ALDH3B1	hsa-mir-2110	ADAMTSL4-AS1	0.0002
BRD4	hsa-mir-2110	FLJ23867	0.0002
BRWD1	hsa-mir-221	GAS5	0.0002
DBT	hsa-mir-197	SNHG1	0.0002
HLX	hsa-mir-2110	ADAMTSL4-AS1	0.0002
HMGB1	hsa-let-7b	SNHG16	0.0002
KPNA5	hsa-let-7b	SNHG16	0.0002
KPNA5	hsa-mir-197	TUG1	0.0002
MARK2	hsa-mir-2110	FLJ23867	0.0002
MGAT4A	hsa-mir-197	SNHG1	0.0002
NCEH1	hsa-mir-2110	FLJ23867	0.0002
PFKFB2	hsa-mir-2110	FLJ23867	0.0002
PLD3	hsa-mir-30c-2	RP11-802E16.3	0.0002
RBM41	hsa-mir-197	SNHG1	0.0002
RPL7A	hsa-mir-197	SNHG1	0.0002
TET3	hsa-mir-2110	ADAMTSL4-AS1	0.0002
TMEM189-UBE2V1	hsa-mir-2110	FLJ23867	0.0002
TMEM189	hsa-mir-2110	FLJ23867	0.0002
TP53	hsa-mir-2110	FLJ23867	0.0002
UBE2V1	hsa-mir-2110	FLJ23867	0.0002
ALMS1	hsa-mir-197	SNHG1	0.0003
HBP1	hsa-let-7b	SNHG16	0.0003
SP100	hsa-let-7b	SNHG16	0.0003
STS	hsa-mir-2110	FLJ23867	0.0003
TNFRSF10D	hsa-mir-30c-2	HYMAI	0.0003
TSEN15	hsa-let-7b	SNHG16	0.0003
USP47	hsa-let-7b	SNHG16	0.0003
ATG5	hsa-mir-30e	SNHG16	0.0005
ATG5	hsa-mir-30e	SNHG5	0.0005
KPNA5	hsa-let-7f-2	RP11-227G15.3	0.0005
PLD3	hsa-mir-30c-2	AC084018.1	0.0005
PLXND1	hsa-let-7f-1	AC135048.13	0.0005
TES	hsa-let-7b	SNHG16	0.0005
TNFRSF10D	hsa-mir-30c-2	TBC1D3P1-DHX40P1	0.0005
YTHDC1	hsa-let-7b	SNHG16	0.0005
AKT3	hsa-mir-221	GAS5	0.0006
ALDH3B1	hsa-mir-2110	RTEL1-TNFRSF6B	0.0006
AZIN1	hsa-mir-30e	SNHG16	0.0006
CHD1	hsa-mir-30e	SNHG5	0.0006
CREBZF	hsa-mir-221	GAS5	0.0006
CUL3	hsa-let-7b	SNHG16	0.0006
DDX6	hsa-mir-221	GAS5	0.0006
DHX9	hsa-let-7b	SNHG16	0.0006
GABPB1	hsa-let-7b	SNHG16	0.0006
HNRNPU	hsa-let-7b	SNHG16	0.0006
KIAA0930	hsa-let-7f-1	AC135048.13	0.0006
NUCKS1	hsa-let-7b	SNHG16	0.0006
RAP1B	hsa-mir-30e	SNHG16	0.0006
RAP1B	hsa-mir-30e	SNHG5	0.0006
RTCA	hsa-let-7b	SNHG16	0.0006
S100A9	hsa-mir-132	RP11-2C24.4	0.0006
SFT2D3	hsa-let-7b	SNHG16	0.0006
SH3GL1	hsa-mir-2110	RTEL1-TNFRSF6B	0.0006
SLC4A7	hsa-mir-30e	SNHG16	0.0006
SYF2	hsa-let-7b	SNHG16	0.0006
ARPP19	hsa-mir-30e	SNHG16	0.0007
ARPP19	hsa-mir-30e	SNHG5	0.0007
GALNT1	hsa-mir-30e	SNHG16	0.0007
GPS1	hsa-let-7f-1	AC135048.13	0.0007
IL6R	hsa-let-7f-1	AC135048.13	0.0007
MARK2	hsa-mir-2110	ADAMTSL4-AS1	0.0007
MGAT4A	hsa-mir-197	CTC-559E9.4	0.0007
PYROXD1	hsa-mir-30e	SNHG16	0.0007
TNKS2	hsa-mir-30e	SNHG16	0.0007
TRIP12	hsa-let-7b	SNHG16	0.0007
ARID3A	hsa-let-7f-1	AC135048.13	0.0009
BRWD1	hsa-mir-221	MALAT1	0.0009
GALNT1	hsa-mir-30e	SNHG5	0.0009
HSPA1B	hsa-mir-326	RP11-44M6.7	0.0009
KCTD21	hsa-let-7f-1	AC135048.13	0.0009
NCL	hsa-mir-221	GAS5	0.0009
PLD3	hsa-mir-30c-2	LOC100128288	0.0009
PYROXD1	hsa-mir-30e	SNHG5	0.0009
SLC25A36	hsa-mir-221	GAS5	0.0009
YIPF4	hsa-mir-221	GAS5	0.0009
DBT	hsa-mir-197	CTC-559E9.4	0.001
ETS1	hsa-mir-221	GAS5	0.001
MAP2K7	hsa-let-7f-1	AC135048.13	0.001
AHCTF1	hsa-let-7b	CTB-89H12.4	0.0011
AHCTF1	hsa-let-7b	MALAT1	0.0011
FBXL3	hsa-mir-221	GAS5	0.0011
FLOT2	hsa-mir-423	AC135048.13	0.0011
HSPA1B	hsa-mir-423	AC135048.13	0.0011
RBM41	hsa-mir-197	CTC-559E9.4	0.0011
TSN	hsa-mir-221	GAS5	0.0011
VAV3	hsa-mir-30e	SNHG16	0.0011
VAV3	hsa-mir-30e	SNHG5	0.0011
ZNF644	hsa-let-7f-2	RP11-227G15.3	0.0011
ZNF708	hsa-mir-197	CTC-559E9.4	0.0011
ATP6AP1	hsa-mir-30c-2	RP11-802E16.3	0.0012
FAM126B	hsa-mir-30e	SNHG16	0.0012
FAM126B	hsa-mir-30e	SNHG5	0.0012
HECTD1	hsa-mir-221	GAS5	0.0012
PCMTD1	hsa-let-7f-2	RP11-227G15.3	0.0012
ROCK2	hsa-mir-30e	SNHG16	0.0012
EIF4A2	hsa-let-7b	MALAT1	0.0013
SPCS3	hsa-let-7b	MALAT1	0.0013
FAM8A1	hsa-mir-30e	SNHG16	0.0014
MDM4	hsa-let-7f-2	TUG1	0.0014
MGAT4A	hsa-mir-197	JPX	0.0014
GGA3	hsa-let-7f-1	AC135048.13	0.0015
NOP58	hsa-mir-221	GAS5	0.0015
PLXND1	hsa-mir-423	AC135048.13	0.0015
SPCS3	hsa-let-7b	CTB-89H12.4	0.0015
TMEM64	hsa-mir-221	GAS5	0.0015
DPP8	hsa-mir-197	TUG1	0.0016
PKM	hsa-mir-423	AC135048.13	0.0016
SLC4A7	hsa-mir-30e	GAS5	0.0016
ZC3H18	hsa-let-7f-1	AC135048.13	0.0016
FAM91A1	hsa-mir-30e	SNHG16	0.0017
CDV3	hsa-let-7b	SNHG16	0.0018
HSPA1B	hsa-mir-326	INO80B-WBP1	0.0018
RAP1B	hsa-mir-30e	GAS5	0.0018
HNRNPU	hsa-mir-30e	SNHG16	0.0019
KRAS	hsa-mir-30e	SNHG16	0.0019
AZIN1	hsa-mir-30e	GAS5	0.002
HNRNPU	hsa-mir-30e	SNHG5	0.002
MDM4	hsa-let-7f-2	RP11-227G15.3	0.002
PRIM2	hsa-let-7f-2	TUG1	0.002
RPS3	hsa-mir-30e	SNHG16	0.002
SUOX	hsa-let-7f-1	AC135048.13	0.002
TWF1	hsa-mir-30e	SNHG16	0.002
TWF1	hsa-mir-30e	SNHG5	0.002
BRI3BP	hsa-let-7f-1	AC135048.13	0.0021
LLPH	hsa-let-7b	SNHG16	0.0022
PARVG	hsa-mir-30c-2	RP11-802E16.3	0.0022
TMEM242	hsa-mir-30e	SNHG16	0.0022
AGO1	hsa-let-7f-1	AC135048.13	0.0024
MYC	hsa-let-7f-1	AC135048.13	0.0024
ARPP19	hsa-mir-30e	GAS5	0.0025
DUSP12	hsa-let-7b	SNHG16	0.0025
ZNF208	hsa-mir-197	CTC-559E9.4	0.0025
ATP6AP1	hsa-mir-30c-2	CTD-2587H24.14	0.0026
DNAJC10	hsa-mir-221	MALAT1	0.0026
GALNT1	hsa-mir-30e	GAS5	0.0026
HMGB1	hsa-let-7b	MALAT1	0.0026
INPPL1	hsa-mir-326	RP11-44M6.7	0.0026
LRRC58	hsa-mir-197	CTC-559E9.4	0.0026
MARK2	hsa-mir-2110	RTEL1-TNFRSF6B	0.0026
RAB40C	hsa-let-7f-1	AC135048.13	0.0026
SH3GL1	hsa-mir-30c-2	AC084018.1	0.0026
SH3GL1	hsa-mir-30c-2	CTD-2587H24.14	0.0026
TSN	hsa-mir-671	RMRP	0.0026
WBP1L	hsa-mir-2110	RP11-197N18.2	0.0026
ATP6AP1	hsa-mir-30c-2	AC084018.1	0.0027
CDKN1B	hsa-mir-221	GAS5	0.0027
MOB4	hsa-let-7f-2	TUG1	0.0027
PGAM4	hsa-mir-139	RP11-793H13.8	0.0027
SMARCAD1	hsa-let-7f-2	TUG1	0.0027
CDKN1B	hsa-mir-30e	SNHG16	0.0028
DDX6	hsa-mir-221	MALAT1	0.0028
PRIM2	hsa-let-7f-2	RP11-227G15.3	0.0028
TKT	hsa-mir-30c-2	RP11-802E16.3	0.0028
CDKN1B	hsa-mir-30e	SNHG5	0.0029
NOD2	hsa-mir-320c-1	ZFP91-CNTF	0.0029
LIMD2	hsa-let-7f-1	AC135048.13	0.003
PPP1R10	hsa-let-7f-1	AC135048.13	0.003
SLC39A1	hsa-mir-30c-2	RP11-802E16.3	0.003
ZNF738	hsa-let-7f-2	RP11-227G15.3	0.003
GOLGA4	hsa-let-7a-3	MALAT1	0.0031
PPP1R12A	hsa-mir-30e	SNHG16	0.0031
S100A9	hsa-mir-132	RNASEK-C17orf49	0.0031
BRD4	hsa-mir-2110	RTEL1-TNFRSF6B	0.0032
HBP1	hsa-let-7b	MALAT1	0.0032
HSPE1-MOB4	hsa-let-7f-2	RP11-227G15.3	0.0032
LDHB	hsa-mir-221	GAS5	0.0032
MOB4	hsa-let-7f-2	RP11-227G15.3	0.0032
NCKIPSD	hsa-let-7f-1	AC135048.13	0.0032
NCOR2	hsa-mir-30c-2	RP11-802E16.3	0.0032
PDE12	hsa-let-7f-2	TUG1	0.0032
PLEKHO2	hsa-mir-30c-2	RP11-802E16.3	0.0032
TNKS2	hsa-mir-221	MALAT1	0.0032
TSEN15	hsa-let-7b	MALAT1	0.0032
TSN	hsa-mir-671	MALAT1	0.0032
VAV3	hsa-mir-30e	GAS5	0.0032
ZDHHC20	hsa-mir-30e	SNHG16	0.0032
HBP1	hsa-let-7b	CTB-89H12.4	0.0033
CCNT2	hsa-let-7f-2	TUG1	0.0034
CREM	hsa-mir-30e	SNHG16	0.0034
HNRNPD	hsa-mir-221	GAS5	0.0034
AATF	hsa-let-7b	SNHG16	0.0035
GPS1	hsa-mir-423	AC135048.13	0.0035
LARP1	hsa-let-7f-1	AC135048.13	0.0035
PARVG	hsa-mir-30c-2	AC084018.1	0.0035
PARVG	hsa-mir-30c-2	CTD-2587H24.14	0.0035
RBM34	hsa-let-7b	MALAT1	0.0035
RNF44	hsa-let-7f-1	AC135048.13	0.0035
USP47	hsa-let-7b	MALAT1	0.0035
AGO1	hsa-mir-320c-1	RP11-400F19.8	0.0036
FAM126B	hsa-mir-30e	GAS5	0.0036
FNDC3A	hsa-let-7f-2	TUG1	0.0036
HDAC1	hsa-mir-671	MALAT1	0.0036
KMT2D	hsa-let-7f-1	AC135048.13	0.0036
NCL	hsa-mir-221	MALAT1	0.0036
SLC25A36	hsa-mir-221	MALAT1	0.0036
SP100	hsa-let-7b	MALAT1	0.0036
USP47	hsa-let-7b	CTB-89H12.4	0.0036
YWHAZ	hsa-let-7f-2	TUG1	0.0036
ARRB2	hsa-mir-423	AC135048.13	0.0037
ARID3A	hsa-mir-30c-2	AC084018.1	0.0039
ROCK2	hsa-mir-30e	GAS5	0.004
GGA3	hsa-let-7a-1	RP11-44M6.7	0.0041
IRF2BPL	hsa-mir-193a	RP11-793H13.8	0.0041
MLXIP	hsa-mir-30c-2	AC084018.1	0.0041
ZFP36L1	hsa-mir-30c-2	RP11-802E16.3	0.0041
KRAS	hsa-mir-671	MALAT1	0.0042
PDE12	hsa-let-7f-2	RP11-227G15.3	0.0042
PDS5A	hsa-let-7b	CTB-89H12.4	0.0042
USP35	hsa-let-7a-1	RP11-44M6.7	0.0043
VAC14	hsa-mir-30c-2	RP11-802E16.3	0.0043
CCNT2	hsa-let-7f-2	RP11-227G15.3	0.0044
NUCB2	hsa-let-7f-2	TUG1	0.0044
PRR13	hsa-mir-30c-2	RP11-802E16.3	0.0044
TKT	hsa-mir-30c-2	AC084018.1	0.0044
ZC3H18	hsa-let-7a-1	RP11-44M6.7	0.0044
ATG5	hsa-mir-30e	MALAT1	0.0045
CANT1	hsa-mir-132	TMX2-CTNND1	0.0045
CEBPB	hsa-mir-423	AC135048.13	0.0045
ELF4	hsa-let-7f-1	AC135048.13	0.0045
ETS1	hsa-mir-221	MALAT1	0.0045
FAM91A1	hsa-mir-30e	GAS5	0.0045
HDGF	hsa-mir-30c-2	CTD-2587H24.14	0.0045
INPPL1	hsa-mir-326	INO80B-WBP1	0.0045
LSM6	hsa-let-7b	MALAT1	0.0045
SERBP1	hsa-let-7b	MALAT1	0.0045
SH3GL1	hsa-mir-30c-2	TP73-AS1	0.0045
SLC39A1	hsa-mir-30c-2	CTD-2587H24.14	0.0045
TES	hsa-let-7b	MALAT1	0.0045
TMEM189-UBE2V1	hsa-mir-2110	RTEL1-TNFRSF6B	0.0045
TMEM189	hsa-mir-2110	RTEL1-TNFRSF6B	0.0045
UBE2V1	hsa-mir-2110	RTEL1-TNFRSF6B	0.0045
VPS41	hsa-mir-30e	SNHG16	0.0045
YTHDC1	hsa-let-7b	MALAT1	0.0045
HNRNPA1	hsa-mir-221	MALAT1	0.0046
AGO1	hsa-mir-30c-2	RP11-802E16.3	0.0047
ATP6AP1	hsa-mir-30c-2	LOC100128288	0.0047
BCL7B	hsa-mir-320c-1	RP11-400F19.8	0.0047
CBFB	hsa-let-7b	MALAT1	0.0047
FNDC3A	hsa-let-7f-2	RP11-227G15.3	0.0047
GABPB1	hsa-let-7b	MALAT1	0.0047
HNRNPA1	hsa-mir-221	RP11-108M9.3	0.0047
HNRNPU	hsa-mir-30e	GAS5	0.0047
INPPL1	hsa-mir-326	RUSC1-AS1	0.0047
KRAS	hsa-mir-30e	GAS5	0.0047
LSM14A	hsa-mir-30e	GAS5	0.0047
LSM6	hsa-let-7b	CTB-89H12.4	0.0047
MLLT1	hsa-mir-30c-2	RP11-802E16.3	0.0047
MMP17	hsa-mir-423	AC135048.13	0.0047
MYC	hsa-let-7a-1	RP11-44M6.7	0.0047
NCOR2	hsa-mir-30c-2	AC084018.1	0.0047
NCOR2	hsa-mir-30c-2	CTD-2587H24.14	0.0047
NDRG1	hsa-mir-423	AC135048.13	0.0047
NOTCH1	hsa-mir-326	RP11-44M6.7	0.0047
NUCB2	hsa-let-7f-2	RP11-227G15.3	0.0047
NUCKS1	hsa-let-7b	MALAT1	0.0047
PHLPP2	hsa-mir-195	RP11-96D1.10	0.0047
RHOC	hsa-mir-2110	RP11-197N18.2	0.0047
RPS3	hsa-mir-30e	GAS5	0.0047
RRP15	hsa-mir-221	MALAT1	0.0047
SETD1B	hsa-mir-30c-2	RP11-802E16.3	0.0047
SF3A1	hsa-let-7f-1	AC135048.13	0.0047
SH3GL1	hsa-mir-30c-2	LOC100128288	0.0047
SH3GL1	hsa-mir-30c-2	RP11-158I13.2	0.0047
SLC39A1	hsa-mir-30c-2	AC084018.1	0.0047
TMPPE	hsa-mir-30c-2	RP11-802E16.3	0.0047
TRAF7	hsa-let-7a-1	RP11-44M6.7	0.0047
TSN	hsa-mir-221	MALAT1	0.0047
UBXN4	hsa-mir-30e	SNHG16	0.0047
UBXN4	hsa-mir-30e	SNHG5	0.0047
ULK1	hsa-mir-320c-1	RAD51L3-RFFL	0.0047
ZNF101	hsa-mir-197	CTC-559E9.4	0.0047
C19orf47	hsa-let-7a-1	RP11-44M6.7	0.0048
C2orf68	hsa-mir-197	CTC-559E9.4	0.0048
CALU	hsa-let-7f-2	TUG1	0.0048
CHD1	hsa-mir-30e	MALAT1	0.0048
GABPB1	hsa-let-7b	CTB-89H12.4	0.0048
HECTD1	hsa-mir-221	RP11-108M9.3	0.0048
HSPA1B	hsa-mir-423	CTD-2587H24.14	0.0048
LUC7L2	hsa-mir-30e	SNHG16	0.0048
RAB40C	hsa-let-7a-1	RP11-44M6.7	0.0048
RRP15	hsa-mir-221	RP11-108M9.3	0.0048
WDR82	hsa-mir-30e	MALAT1	0.0048
YY1	hsa-mir-221	GAS5	0.0048
C7orf55-LUC7L2	hsa-mir-30e	SNHG5	0.0049
LUC7L2	hsa-mir-30e	SNHG5	0.0049
C15orf39	hsa-mir-423	AC135048.13	0.005
NOTCH1	hsa-mir-139	RP11-793H13.8	0.005
MARK4	hsa-mir-30c-2	RP11-802E16.3	0.0051
NAP1L1	hsa-mir-331	MALAT1	0.0051
DHX9	hsa-let-7b	MALAT1	0.0053
FAM222B	hsa-let-7f-1	AC135048.13	0.0053
MTA1	hsa-mir-30c-2	RP11-802E16.3	0.0053
MTDH	hsa-mir-30e	SNHG16	0.0053
NOP58	hsa-mir-221	MALAT1	0.0053
PEPD	hsa-mir-423	AC135048.13	0.0053
SAMD4B	hsa-let-7a-1	RP11-44M6.7	0.0053
SFT2D3	hsa-let-7b	MALAT1	0.0053
SRCAP	hsa-mir-320c-1	RP11-400F19.8	0.0053
TMEM64	hsa-mir-221	MALAT1	0.0053
DPM2	hsa-mir-30c-2	RP11-802E16.3	0.0054
RBM39	hsa-mir-221	MALAT1	0.0055
AGO1	hsa-mir-320c-1	RAD51L3-RFFL	0.0056
AZIN1	hsa-mir-30e	MALAT1	0.0056
CDKN1B	hsa-mir-30e	GAS5	0.0056
CUL3	hsa-let-7b	MALAT1	0.0056
DHX9	hsa-let-7b	CTB-89H12.4	0.0056
DVL3	hsa-let-7a-1	RP11-44M6.7	0.0056
GGA3	hsa-mir-423	AC135048.13	0.0056
HNRNPU	hsa-let-7b	CTB-89H12.4	0.0056
HNRNPU	hsa-let-7b	MALAT1	0.0056
LIMD2	hsa-let-7a-1	RP11-44M6.7	0.0056
MINK1	hsa-mir-423	AC135048.13	0.0056
MLXIP	hsa-mir-30c-2	TP73-AS1	0.0056
MTDH	hsa-mir-30e	SNHG5	0.0056
NFKB2	hsa-mir-423	AC135048.13	0.0056
NOP58	hsa-mir-221	RP11-108M9.3	0.0056
NOTCH1	hsa-mir-30c-2	AC084018.1	0.0056
PISD	hsa-mir-125a	TP73-AS1	0.0056
PKM	hsa-mir-423	CTD-2587H24.14	0.0056
POLL	hsa-let-7a-1	RP11-44M6.7	0.0056
PPP1R10	hsa-let-7a-1	RP11-44M6.7	0.0056
PRR13	hsa-mir-30c-2	AC084018.1	0.0056
RAP1B	hsa-mir-30e	MALAT1	0.0056
RBM39	hsa-mir-221	RP11-108M9.3	0.0056
RBMS2	hsa-mir-30c-2	RP11-802E16.3	0.0056
ULK1	hsa-mir-320c-1	ZFP91-CNTF	0.0056
USP47	hsa-let-7a-3	MALAT1	0.0056
VAC14	hsa-mir-30c-2	AC084018.1	0.0056
WIPF2	hsa-mir-423	AC135048.13	0.0056
MRPS2	hsa-let-7a-1	RP11-44M6.7	0.0057
NCKIPSD	hsa-let-7a-1	RP11-44M6.7	0.0057
SMARCA4	hsa-mir-139	RP11-793H13.8	0.0057
ZNF28	hsa-let-7f-2	RP11-227G15.3	0.0057
MLLT1	hsa-mir-30c-2	CTD-2587H24.14	0.0058
PNPO	hsa-mir-139	HYMAI	0.0058
ARRDC1	hsa-mir-326	INO80B-WBP1	0.0059
CUL3	hsa-let-7b	CTB-89H12.4	0.0059
DYRK1B	hsa-mir-320c-1	RP11-400F19.8	0.0059
IL6R	hsa-let-7f-1	XXbac-BPG300A18.13	0.0059
IPO8	hsa-let-7b	CTB-89H12.4	0.0059
PNPO	hsa-mir-139	TMX2-CTNND1	0.0059
PPP1R12A	hsa-mir-30e	GAS5	0.0059
USP47	hsa-let-7a-3	CTB-89H12.4	0.0059
ARFGAP1	hsa-mir-30c-2	RP11-802E16.3	0.006
BAHD1	hsa-mir-30c-2	RP11-802E16.3	0.0061
BRI3BP	hsa-mir-30c-2	AC084018.1	0.0061
KHSRP	hsa-mir-30c-2	AC084018.1	0.0061
LARP1	hsa-let-7a-1	RP11-44M6.7	0.0061
MAST3	hsa-mir-30c-2	RP11-802E16.3	0.0061
MLXIP	hsa-mir-30c-2	LOC100128288	0.0061
PRRC2A	hsa-mir-423	AC135048.13	0.0061
RNF44	hsa-let-7a-1	RP11-44M6.7	0.0061
TANGO2	hsa-mir-30c-2	RP11-802E16.3	0.0061
AGO1	hsa-mir-30c-2	CTD-2587H24.14	0.0062
SLC38A7	hsa-mir-30c-2	CTD-2587H24.14	0.0062
ZDHHC20	hsa-mir-30e	GAS5	0.0062
ZNF687	hsa-mir-30c-2	RP11-802E16.3	0.0062
AGO1	hsa-mir-30c-2	AC084018.1	0.0063
AGO1	hsa-mir-423	AC135048.13	0.0063
ARPP19	hsa-mir-30e	MALAT1	0.0063
C7orf43	hsa-mir-30c-2	RP11-802E16.3	0.0063
CIZ1	hsa-mir-326	RP11-44M6.7	0.0063
FAM96A	hsa-let-7b	MALAT1	0.0063
FKBP8	hsa-let-7a-1	RP11-44M6.7	0.0063
MYC	hsa-mir-423	AC135048.13	0.0063
SETD1B	hsa-mir-30c-2	CTD-2587H24.14	0.0063
SLC38A7	hsa-mir-30c-2	AC084018.1	0.0063
SOD2	hsa-mir-671	MALAT1	0.0063
TNKS2	hsa-mir-30e	MALAT1	0.0063
WIZ	hsa-mir-30c-2	CTD-2587H24.14	0.0063
ARRDC1	hsa-mir-326	RUSC1-AS1	0.0064
ABCF2	hsa-mir-326	RP11-44M6.7	0.0065
C19orf47	hsa-mir-30c-2	CTD-2587H24.14	0.0065
GALNT1	hsa-mir-30e	MALAT1	0.0065
KMT2D	hsa-mir-30c-2	RP11-802E16.3	0.0065
SETD1B	hsa-mir-30c-2	AC084018.1	0.0065
SF3B4	hsa-mir-423	AC135048.13	0.0065
SRSF7	hsa-mir-30e	GAS5	0.0065
FAM96A	hsa-let-7b	CTB-89H12.4	0.0066
IKZF4	hsa-mir-30c-2	RP11-802E16.3	0.0066
KMT2B	hsa-mir-423	AC135048.13	0.0066
KMT2D	hsa-let-7a-1	RP11-44M6.7	0.0066
MTFR1L	hsa-let-7a-1	RP11-44M6.7	0.0066
PYROXD1	hsa-mir-30e	MALAT1	0.0066
RBM12B	hsa-let-7b	CTB-89H12.4	0.0066
SNAPC4	hsa-mir-30c-2	CTD-2587H24.14	0.0066
TRIP12	hsa-let-7b	MALAT1	0.0066
WIZ	hsa-mir-30c-2	AC084018.1	0.0066
AKT1	hsa-mir-326	INO80B-WBP1	0.0067
C19orf47	hsa-mir-30c-2	AC084018.1	0.0067
MOGAT1	hsa-mir-30e	SNHG16	0.0067
AGO1	hsa-mir-320c-1	ZFP91-CNTF	0.0068
ATXN2	hsa-let-7f-1	AC135048.13	0.0068
SLC39A6	hsa-mir-139	RP11-793H13.8	0.0068
BCL7B	hsa-mir-320c-1	RAD51L3-RFFL	0.0069
CDKN1B	hsa-mir-221	MALAT1	0.0069
KLC2	hsa-mir-30c-2	RP11-802E16.3	0.0069
TET3	hsa-mir-193a	TP73-AS1	0.0069
ALAS1	hsa-mir-423	AC135048.13	0.007
EIF1AD	hsa-mir-30c-2	RP11-802E16.3	0.007
ERI1	hsa-mir-30c-2	RP11-802E16.3	0.007
MARK4	hsa-mir-30c-2	CTD-2587H24.14	0.007
PTP4A1	hsa-mir-30e	SNHG16	0.007
RPL9	hsa-let-7a-3	MALAT1	0.007
SLC25A44	hsa-mir-92a-1	RP11-400F19.8	0.007
TRIP12	hsa-let-7b	CTB-89H12.4	0.007
CDK16	hsa-mir-139	RP11-793H13.8	0.0071
MAP2K7	hsa-let-7f-1	XXbac-BPG300A18.13	0.0071
PTGES2	hsa-let-7a-1	RP11-44M6.7	0.0071
RARG	hsa-mir-320c-1	RP11-400F19.8	0.0071
SGSM2	hsa-mir-30c-2	RP11-802E16.3	0.0071
MARK4	hsa-mir-30c-2	AC084018.1	0.0072
CLCN7	hsa-mir-423	AC135048.13	0.0073
DPM2	hsa-mir-30c-2	CTD-2587H24.14	0.0073
EDC3	hsa-mir-320c-1	RP11-400F19.8	0.0073
FOXJ2	hsa-mir-423	AC135048.13	0.0073
RPAP1	hsa-mir-30c-2	RP11-802E16.3	0.0073
RPL9	hsa-let-7a-3	CTB-89H12.4	0.0073
WBP2	hsa-mir-423	AC135048.13	0.0073
ATG9A	hsa-let-7a-1	RP11-44M6.7	0.0074
GNAI2	hsa-mir-30c-2	CTD-2587H24.14	0.0074
MTA1	hsa-mir-30c-2	AC084018.1	0.0074
CLPB	hsa-mir-193a	RP11-793H13.8	0.0075
EEF2	hsa-let-7a-1	RP11-44M6.7	0.0075
MTA1	hsa-mir-423	AC135048.13	0.0075
SHMT2	hsa-let-7a-1	RP11-44M6.7	0.0075
TLN1	hsa-mir-193a	RP11-793H13.8	0.0075
UNK	hsa-let-7a-1	RP11-44M6.7	0.0075
ZNF324	hsa-mir-423	AC135048.13	0.0075
DPM2	hsa-mir-30c-2	AC084018.1	0.0076
GNAI2	hsa-mir-30c-2	AC084018.1	0.0076
MIDN	hsa-let-7f-1	XXbac-BPG300A18.13	0.0076
SYNGR2	hsa-mir-423	AC135048.13	0.0077
SRM	hsa-mir-423	AC135048.13	0.0078
NPM3	hsa-mir-320c-1	ZFP91-CNTF	0.0079
SH2B3	hsa-mir-92a-1	RP11-400F19.8	0.0079
TUT1	hsa-mir-193a	RP11-793H13.8	0.0079
MOB1A	hsa-mir-564	MALAT1	0.008
SMARCD2	hsa-mir-423	AC135048.13	0.008
SRCAP	hsa-mir-320c-1	RAD51L3-RFFL	0.008
TP53	hsa-mir-30c-2	RP11-802E16.3	0.008
VPS41	hsa-mir-30e	GAS5	0.008
ZSCAN22	hsa-mir-30c-2	RP11-802E16.3	0.008
ZYX	hsa-mir-423	CTD-2587H24.14	0.008
H6PD	hsa-mir-30c-2	CTD-2587H24.14	0.0081
MYC	hsa-let-7a-1	HCP5	0.0081
SBF1	hsa-mir-30c-2	RP11-802E16.3	0.0081
SF3A1	hsa-let-7a-1	RP11-44M6.7	0.0081
EFHD2	hsa-mir-423	AC135048.13	0.0082
HECTD3	hsa-mir-30c-2	AC084018.1	0.0082
PPP2CA	hsa-mir-671	MALAT1	0.0082
H6PD	hsa-mir-30c-2	AC084018.1	0.0084
NOTCH1	hsa-mir-139	TMX2-CTNND1	0.0084
ARFGAP1	hsa-mir-30c-2	AC084018.1	0.0085
ARFGAP1	hsa-mir-423	AC135048.13	0.0085
BAHD1	hsa-mir-30c-2	CTD-2587H24.14	0.0085
BCL7B	hsa-mir-320c-1	ZFP91-CNTF	0.0085
CDC37	hsa-mir-139	TMX2-CTNND1	0.0085
DRAP1	hsa-mir-423	AC135048.13	0.0085
DSN1	hsa-mir-30c-2	AC084018.1	0.0085
DSN1	hsa-mir-30c-2	CTD-2587H24.14	0.0085
ELMO2	hsa-mir-193a	RP11-793H13.8	0.0085
GGA3	hsa-let-7a-1	XXbac-BPG300A18.13	0.0085
GYS1	hsa-mir-326	RP11-44M6.7	0.0085
HNRNPD	hsa-mir-221	MALAT1	0.0085
IRF2BPL	hsa-mir-193a	TP73-AS1	0.0085
LARP1	hsa-mir-30c-2	AC084018.1	0.0085
LIMK1	hsa-mir-30c-2	CTD-2587H24.14	0.0085
MAPK8IP3	hsa-mir-423	AC135048.13	0.0085
MAST3	hsa-mir-30c-2	AC084018.1	0.0085
MAST3	hsa-mir-30c-2	CTD-2587H24.14	0.0085
MIER2	hsa-mir-423	AC135048.13	0.0085
POLL	hsa-mir-204	SENP3-EIF4A1	0.0085
RPS6KA1	hsa-mir-320c-1	ZFP91-CNTF	0.0085
TACO1	hsa-mir-30c-2	AC084018.1	0.0085
TANGO2	hsa-mir-30c-2	AC084018.1	0.0085
TANGO2	hsa-mir-30c-2	CTD-2587H24.14	0.0085
UBXN4	hsa-mir-30e	GAS5	0.0085
URM1	hsa-mir-423	AC135048.13	0.0085
USP35	hsa-let-7a-1	XXbac-BPG300A18.13	0.0085
VAC14	hsa-mir-30c-2	TP73-AS1	0.0085
WASF2	hsa-mir-423	AC135048.13	0.0085
ZNF609	hsa-let-7a-1	RP11-44M6.7	0.0085
BAHD1	hsa-mir-30c-2	AC084018.1	0.0086
C7orf43	hsa-mir-30c-2	AC084018.1	0.0086
C7orf43	hsa-mir-30c-2	CTD-2587H24.14	0.0086
CANT1	hsa-mir-132	AC012307.3	0.0086
CHTF8	hsa-mir-423	AC135048.13	0.0086
CSF1	hsa-mir-30c-2	RP11-802E16.3	0.0086
CSNK1D	hsa-mir-30c-2	AC084018.1	0.0086
CSNK1D	hsa-mir-30c-2	CTD-2587H24.14	0.0086
EDC3	hsa-mir-30c-2	RP11-802E16.3	0.0086
FAM126B	hsa-mir-30e	MALAT1	0.0086
GPS1	hsa-mir-423	CTD-2587H24.14	0.0086
IKZF4	hsa-mir-30c-2	CTD-2587H24.14	0.0086
KMT2D	hsa-mir-30c-2	AC084018.1	0.0086
KMT2D	hsa-mir-30c-2	CTD-2587H24.14	0.0086
LARP1	hsa-mir-423	AC135048.13	0.0086
LIMK1	hsa-mir-30c-2	AC084018.1	0.0086
MEPCE	hsa-let-7a-1	RP11-44M6.7	0.0086
NOTCH1	hsa-mir-30c-2	TP73-AS1	0.0086
NRBP1	hsa-mir-30c-2	RP11-802E16.3	0.0086
RAB11B	hsa-mir-139	RP11-793H13.8	0.0086
RAB5B	hsa-mir-30c-2	AC084018.1	0.0086
RAB5B	hsa-mir-30c-2	CTD-2587H24.14	0.0086
RPS3A	hsa-let-7a-3	MALAT1	0.0086
SAMD4B	hsa-let-7a-1	HCP5	0.0086
SH2B1	hsa-mir-423	AC135048.13	0.0086
SLC25A24	hsa-let-7b	MALAT1	0.0086
SNRNP40	hsa-mir-30c-2	RP11-802E16.3	0.0086
SPATA2	hsa-mir-423	AC135048.13	0.0086
SPEN	hsa-mir-423	AC135048.13	0.0086
YTHDF1	hsa-mir-139	RP11-793H13.8	0.0086
ZER1	hsa-mir-30c-2	RP11-802E16.3	0.0086
ZNF687	hsa-mir-30c-2	AC084018.1	0.0086
CMTM3	hsa-mir-132	RP11-2C24.4	0.0088
DYRK1B	hsa-mir-320c-1	RAD51L3-RFFL	0.0088
FAM222B	hsa-let-7a-1	RP11-44M6.7	0.0088
GGA3	hsa-let-7f-1	XXbac-BPG300A18.13	0.0088
IKZF4	hsa-mir-30c-2	AC084018.1	0.0088
IPPK	hsa-mir-139	RP11-793H13.8	0.0088
MLLT1	hsa-mir-30c-2	TP73-AS1	0.0088
MLXIP	hsa-mir-193a	TP73-AS1	0.0088
MYO9B	hsa-mir-193a	RP11-793H13.8	0.0088
NOTCH1	hsa-mir-30c-2	LOC100128288	0.0088
PBX2	hsa-let-7a-1	RP11-44M6.7	0.0088
ROCK2	hsa-mir-30e	MALAT1	0.0088
RPS3A	hsa-let-7a-3	CTB-89H12.4	0.0088
SMARCA4	hsa-mir-139	TMX2-CTNND1	0.0088
ANKRD40	hsa-mir-30c-2	RP11-802E16.3	0.0089
ARRB2	hsa-mir-423	CTD-2587H24.14	0.0089
BAK1	hsa-mir-30c-2	RP11-802E16.3	0.0089
BPNT1	hsa-mir-30c-2	AC084018.1	0.0089
CIZ1	hsa-mir-326	INO80B-WBP1	0.0089
DDOST	hsa-mir-30c-2	RP11-802E16.3	0.0089
GGA3	hsa-let-7a-1	RP11-264B17.3	0.0089
HYOU1	hsa-mir-193a	RP11-793H13.8	0.0089
KLC2	hsa-mir-30c-2	CTD-2587H24.14	0.0089
RPS6KB2	hsa-mir-193a	RP11-793H13.8	0.0089
ABCF2	hsa-mir-326	INO80B-WBP1	0.009
AGO1	hsa-mir-30c-2	TP73-AS1	0.009
CAPN15	hsa-mir-423	AC135048.13	0.009
EIF1AD	hsa-mir-30c-2	CTD-2587H24.14	0.009
FAM8A1	hsa-mir-30e	MALAT1	0.009
KLC2	hsa-mir-30c-2	AC084018.1	0.009
SEMA4D	hsa-let-7a-1	RP11-44M6.7	0.009
SLC38A7	hsa-mir-30c-2	TP73-AS1	0.009
SRCAP	hsa-mir-320c-1	ZFP91-CNTF	0.009
USP35	hsa-let-7a-1	RP11-264B17.3	0.009
KIAA1143	hsa-let-7a-3	CTB-89H12.4	0.0091
WDR13	hsa-mir-139	TMX2-CTNND1	0.0091
ZC3H18	hsa-let-7a-1	RP11-264B17.3	0.0091
C2CD2	hsa-mir-320c-1	RP11-400F19.8	0.0092
JOSD1	hsa-mir-30c-2	RP11-802E16.3	0.0092
SZT2	hsa-mir-423	AC135048.13	0.0092
ABCF2	hsa-mir-326	RUSC1-AS1	0.0093
C19orf47	hsa-mir-30c-2	TP73-AS1	0.0093
CIZ1	hsa-mir-326	RUSC1-AS1	0.0093
DVL3	hsa-let-7a-1	HCP5	0.0093
EIF1AD	hsa-mir-30c-2	AC084018.1	0.0093
EIF4G2	hsa-let-7f-1	AC135048.13	0.0093
EPS15L1	hsa-mir-30c-2	AC084018.1	0.0093
EPS15L1	hsa-mir-30c-2	CTD-2587H24.14	0.0093
FAM91A1	hsa-mir-30e	MALAT1	0.0093
MED29	hsa-mir-30c-2	CTD-2587H24.14	0.0093
MRPS2	hsa-let-7a-1	HCP5	0.0093
MTDH	hsa-mir-30e	GAS5	0.0093
MYC	hsa-let-7a-1	XXbac-BPG300A18.13	0.0093
NFE2L1	hsa-mir-30c-2	AC084018.1	0.0093
NFE2L1	hsa-mir-30c-2	CTD-2587H24.14	0.0093
PCGF3	hsa-mir-30c-2	CTD-2587H24.14	0.0093
POLL	hsa-let-7a-1	HCP5	0.0093
RHOT2	hsa-mir-92a-1	RP11-400F19.8	0.0093
RPAP1	hsa-mir-30c-2	AC084018.1	0.0093
RPAP1	hsa-mir-30c-2	CTD-2587H24.14	0.0093
SETD1B	hsa-mir-30c-2	LOC100128288	0.0093
SETD1B	hsa-mir-30c-2	TP73-AS1	0.0093
SGSM2	hsa-mir-30c-2	AC084018.1	0.0093
SHMT2	hsa-mir-423	AC135048.13	0.0093
SLC35C1	hsa-mir-30c-2	AC084018.1	0.0093
SLC35C1	hsa-mir-30c-2	CTD-2587H24.14	0.0093
SLC38A7	hsa-mir-30c-2	LOC100128288	0.0093
SP1	hsa-mir-423	AC135048.13	0.0093
STARD5	hsa-mir-30c-2	RP11-802E16.3	0.0093
STRIP1	hsa-mir-30c-2	RP11-802E16.3	0.0093
SYNE3	hsa-mir-132	TMX2-CTNND1	0.0093
TUSC2	hsa-mir-132	TMX2-CTNND1	0.0093
WIZ	hsa-mir-30c-2	TP73-AS1	0.0093
CDV3	hsa-let-7b	MALAT1	0.0094
GRK6	hsa-mir-326	RUSC1-AS1	0.0094
STIP1	hsa-mir-193a	RP11-793H13.8	0.0094
TRIM4	hsa-mir-30c-2	RP11-802E16.3	0.0094
UNK	hsa-mir-423	AC135048.13	0.0094
ZNF543	hsa-mir-30c-2	AC084018.1	0.0094
HNRNPU	hsa-mir-30e	MALAT1	0.0095
KRAS	hsa-mir-30e	MALAT1	0.0095
LETM1	hsa-mir-30c-2	CTD-2587H24.14	0.0095
MYO18A	hsa-mir-30c-2	AC084018.1	0.0095
PBX2	hsa-mir-326	RP11-44M6.7	0.0095
RHOC	hsa-mir-2110	RTEL1-TNFRSF6B	0.0095
SNX6	hsa-let-7a-3	CTB-89H12.4	0.0095
BRI3BP	hsa-let-7f-1	XXbac-BPG300A18.13	0.0096
MED29	hsa-mir-30c-2	AC084018.1	0.0096
SLC39A6	hsa-mir-139	HYMAI	0.0096
ZSCAN22	hsa-mir-30c-2	CTD-2587H24.14	0.0096
RPS3	hsa-mir-30e	MALAT1	0.0097
TP53	hsa-mir-30c-2	CTD-2587H24.14	0.0097
TWF1	hsa-mir-30e	MALAT1	0.0097
LIMD2	hsa-mir-139	TMX2-CTNND1	0.0098
RCE1	hsa-mir-423	AC135048.13	0.0098
RREB1	hsa-mir-139	HYMAI	0.0098
AGO1	hsa-let-7f-1	XXbac-BPG300A18.13	0.0099
AGO2	hsa-let-7a-1	RP11-44M6.7	0.0099
CCNG1	hsa-let-7b	MALAT1	0.0099
CDK16	hsa-mir-139	HYMAI	0.0099
CDV3	hsa-let-7b	CTB-89H12.4	0.0099
CNNM4	hsa-mir-326	RUSC1-AS1	0.0099
EDC3	hsa-mir-320c-1	RAD51L3-RFFL	0.0099
EPN1	hsa-mir-423	CTD-2587H24.14	0.0099
FBXL18	hsa-mir-139	HYMAI	0.0099
GPS1	hsa-mir-132	AC012307.3	0.0099
HDGF	hsa-mir-423	CTD-2587H24.14	0.0099
HMG20A	hsa-mir-30c-2	RP11-802E16.3	0.0099
LETM1	hsa-mir-30c-2	AC084018.1	0.0099
MARK4	hsa-mir-30c-2	TP73-AS1	0.0099
MRPS18B	hsa-mir-320c-1	RP11-400F19.8	0.0099
MTA1	hsa-mir-30c-2	TP73-AS1	0.0099
MYC	hsa-let-7a-1	RP11-264B17.3	0.0099
MYC	hsa-let-7f-1	XXbac-BPG300A18.13	0.0099
PML	hsa-mir-423	AC135048.13	0.0099
PPARGC1B	hsa-mir-423	AC135048.13	0.0099
RAB40C	hsa-let-7a-1	XXbac-BPG300A18.13	0.0099
RABL2A	hsa-let-7a-1	RP11-44M6.7	0.0099
RABL2B	hsa-let-7a-1	RP11-44M6.7	0.0099
RARG	hsa-mir-320c-1	RAD51L3-RFFL	0.0099
SBF1	hsa-mir-30c-2	AC084018.1	0.0099
SBF1	hsa-mir-30c-2	CTD-2587H24.14	0.0099
SLC39A6	hsa-mir-139	TMX2-CTNND1	0.0099
TP53	hsa-mir-30c-2	AC084018.1	0.0099
TRAF7	hsa-let-7a-1	RP11-264B17.3	0.0099
ZC3H4	hsa-mir-423	AC135048.13	0.0099
AKT2	hsa-mir-423	AC135048.13	0.01
CDK16	hsa-mir-139	TMX2-CTNND1	0.01
DPM2	hsa-mir-30c-2	TP73-AS1	0.01
DYRK1B	hsa-mir-320c-1	ZFP91-CNTF	0.01
FBXL18	hsa-mir-139	TMX2-CTNND1	0.01
SAMD4B	hsa-let-7a-1	XXbac-BPG300A18.13	0.01
ATXN2L	hsa-let-7a-1	HCP5	0.0102
KDM6B	hsa-mir-423	CTD-2587H24.14	0.0102
DDX56	hsa-mir-423	AC135048.13	0.0103
KDM6B	hsa-mir-423	CHKB-CPT1B	0.0103
LLPH	hsa-let-7b	MALAT1	0.0103
LMBR1L	hsa-mir-30c-2	CTD-2587H24.14	0.0103
MAP3K3	hsa-mir-193a	RP11-793H13.8	0.0103
MDH2	hsa-mir-193a	RP11-793H13.8	0.0103
RHBDF2	hsa-let-7f-1	XXbac-BPG300A18.13	0.0103
STIM1	hsa-mir-423	AC135048.13	0.0103
TMEM242	hsa-mir-30e	MALAT1	0.0103
TPCN1	hsa-mir-23b	TP73-AS1	0.0103
TRPM2	hsa-mir-423	CTD-2587H24.14	0.0103
YY1	hsa-mir-221	MALAT1	0.0103
ZC3H7B	hsa-mir-193a	RP11-793H13.8	0.0103
ZNF609	hsa-mir-423	AC135048.13	0.0103
C19orf47	hsa-let-7a-1	RP11-264B17.3	0.0105
DPM2	hsa-mir-30c-2	LOC100128288	0.0105
DPM2	hsa-mir-30c-2	RP11-158I13.2	0.0105
DUSP12	hsa-let-7b	MALAT1	0.0105
LMBR1L	hsa-mir-30c-2	AC084018.1	0.0105
MPI	hsa-mir-128-2	HCP5	0.0105
NRBP1	hsa-mir-30c-2	CTD-2587H24.14	0.0105
SLC25A6	hsa-mir-139	HYMAI	0.0105
TESK1	hsa-mir-92a-1	RP11-400F19.8	0.0105
TRIM41	hsa-mir-423	AC135048.13	0.0105
DDB1	hsa-mir-30c-2	AC084018.1	0.0107
LIMD2	hsa-let-7a-1	XXbac-BPG300A18.13	0.0107
RAB40C	hsa-let-7f-1	XXbac-BPG300A18.13	0.0107
RHOF	hsa-mir-30c-2	RP11-802E16.3	0.0107
GYS1	hsa-mir-326	INO80B-WBP1	0.0108
HECTD3	hsa-mir-30c-2	TP73-AS1	0.0108
SHOC2	hsa-let-7a-3	MALAT1	0.0108
SLC25A6	hsa-mir-139	TMX2-CTNND1	0.0108
SNRNP40	hsa-mir-30c-2	CTD-2587H24.14	0.0108
CMTM3	hsa-mir-132	TMX2-CTNND1	0.011
EDC3	hsa-mir-30c-2	CTD-2587H24.14	0.011
H6PD	hsa-mir-30c-2	TP73-AS1	0.011
NRBP1	hsa-mir-30c-2	AC084018.1	0.011
RAB40C	hsa-let-7a-1	RP11-264B17.3	0.011
CSF1	hsa-mir-30c-2	CTD-2587H24.14	0.0111
DVL3	hsa-let-7a-1	XXbac-BPG300A18.13	0.0112
TACO1	hsa-mir-30c-2	TP73-AS1	0.0112
ADD1	hsa-mir-320c-1	RP11-400F19.8	0.0113
CSF1	hsa-mir-30c-2	AC084018.1	0.0113
EDC3	hsa-mir-30c-2	AC084018.1	0.0113
FLII	hsa-mir-423	CTD-2587H24.14	0.0113
HUWE1	hsa-mir-30c-2	RP11-802E16.3	0.0113
POLL	hsa-let-7a-1	XXbac-BPG300A18.13	0.0113
SAMD4B	hsa-let-7a-1	RP11-264B17.3	0.0113
SLC5A6	hsa-mir-423	AC135048.13	0.0113
NCKIPSD	hsa-let-7a-1	XXbac-BPG300A18.13	0.0114
RAB5B	hsa-mir-132	TMX2-CTNND1	0.0114
ZER1	hsa-mir-30c-2	AC084018.1	0.0114
DDOST	hsa-mir-30c-2	CTD-2587H24.14	0.0115
FHOD1	hsa-mir-423	CTD-2587H24.14	0.0115
FLII	hsa-mir-423	CHKB-CPT1B	0.0115
GYS1	hsa-mir-326	RUSC1-AS1	0.0115
MLEC	hsa-mir-139	TMX2-CTNND1	0.0115
MRPS2	hsa-let-7a-1	XXbac-BPG300A18.13	0.0115
PHF8	hsa-let-7a-1	RP11-44M6.7	0.0115
SDK2	hsa-mir-128-2	HCP5	0.0115
UNK	hsa-let-7a-1	HCP5	0.0115
ABL1	hsa-mir-423	AC135048.13	0.0116
ARFGAP1	hsa-mir-30c-2	TP73-AS1	0.0116
BAK1	hsa-mir-30c-2	CTD-2587H24.14	0.0116
E2F3	hsa-mir-139	RP11-793H13.8	0.0116
MAST3	hsa-mir-30c-2	TP73-AS1	0.0116
PTP4A1	hsa-mir-30e	GAS5	0.0116
SLC25A38	hsa-mir-30c-2	CTD-2587H24.14	0.0116
TACO1	hsa-mir-30c-2	LOC100128288	0.0116
TRRAP	hsa-let-7a-1	RP11-44M6.7	0.0116
ANKRD40	hsa-mir-30c-2	CTD-2587H24.14	0.0117
BAHD1	hsa-mir-30c-2	TP73-AS1	0.0117
CDKN1B	hsa-mir-30e	MALAT1	0.0117
PCIF1	hsa-let-7a-1	HCP5	0.0117
POM121	hsa-mir-423	AC135048.13	0.0117
TACO1	hsa-mir-30c-2	RP11-158I13.2	0.0117
ZNF687	hsa-mir-30c-2	TP73-AS1	0.0118
DDOST	hsa-mir-30c-2	AC084018.1	0.0119
FHOD1	hsa-mir-423	CHKB-CPT1B	0.0119
LIMD2	hsa-let-7f-1	XXbac-BPG300A18.13	0.0119
LIMK1	hsa-mir-30c-2	TP73-AS1	0.0119
RARG	hsa-mir-320c-1	ZFP91-CNTF	0.0119
ZYX	hsa-mir-423	GAS6-AS1	0.0119
ANKRD40	hsa-mir-30c-2	AC084018.1	0.012
ATG4C	hsa-let-7a-3	CTB-89H12.4	0.012
BAK1	hsa-mir-30c-2	AC084018.1	0.012
BAK1	hsa-mir-423	AC135048.13	0.012
COMMD9	hsa-mir-423	AC135048.13	0.012
JOSD1	hsa-mir-30c-2	CTD-2587H24.14	0.012
LARP1	hsa-let-7a-1	XXbac-BPG300A18.13	0.012
LIMD2	hsa-let-7a-1	RP11-264B17.3	0.012
MINK1	hsa-mir-423	CTD-2587H24.14	0.012
NFKB2	hsa-mir-423	CTD-2587H24.14	0.012
PFKFB2	hsa-mir-125a	TP73-AS1	0.012
PPP1R10	hsa-let-7a-1	RP11-264B17.3	0.012
SLC25A38	hsa-mir-30c-2	AC084018.1	0.012
STAU1	hsa-mir-30c-2	RP11-802E16.3	0.012
TTC4	hsa-mir-125a	TP73-AS1	0.012
ULK1	hsa-mir-423	CTD-2587H24.14	0.012
ZNF689	hsa-mir-326	RUSC1-AS1	0.012
ARFGAP1	hsa-mir-30c-2	LOC100128288	0.0121
BAZ2A	hsa-mir-193a	RP11-793H13.8	0.0121
BPNT1	hsa-mir-30c-2	TP73-AS1	0.0121
C7orf43	hsa-mir-30c-2	TP73-AS1	0.0121
CSNK1D	hsa-mir-30c-2	TP73-AS1	0.0121
DVL3	hsa-let-7a-1	RP11-264B17.3	0.0121
DVL3	hsa-let-7f-1	XXbac-BPG300A18.13	0.0121
EIF3B	hsa-mir-423	AC135048.13	0.0121
FKBP8	hsa-let-7a-1	XXbac-BPG300A18.13	0.0121
GGA3	hsa-mir-423	CTD-2587H24.14	0.0121
IKZF4	hsa-mir-30c-2	TP73-AS1	0.0121
ITGA3	hsa-let-7f-1	XXbac-BPG300A18.13	0.0121
JOSD1	hsa-mir-30c-2	AC084018.1	0.0121
KLHL42	hsa-mir-30c-2	AC084018.1	0.0121
KMT2D	hsa-let-7a-1	XXbac-BPG300A18.13	0.0121
MAP3K3	hsa-mir-132	TMX2-CTNND1	0.0121
MAX	hsa-mir-320c-1	RAD51L3-RFFL	0.0121
MRPS2	hsa-let-7a-1	RP11-264B17.3	0.0121
NCKIPSD	hsa-let-7a-1	RP11-264B17.3	0.0121
NCKIPSD	hsa-let-7f-1	XXbac-BPG300A18.13	0.0121
NFKB2	hsa-mir-423	CHKB-CPT1B	0.0121
PHF8	hsa-mir-326	RP11-44M6.7	0.0121
POLL	hsa-let-7a-1	RP11-264B17.3	0.0121
POLL	hsa-let-7f-1	XXbac-BPG300A18.13	0.0121
PPP1R12A	hsa-mir-30e	MALAT1	0.0121
RAB5B	hsa-mir-30c-2	TP73-AS1	0.0121
REPIN1	hsa-mir-193a	RP11-793H13.8	0.0121
RIN3	hsa-mir-423	CTD-2587H24.14	0.0121
SF3A1	hsa-let-7a-1	HCP5	0.0121
STARD5	hsa-mir-30c-2	AC084018.1	0.0121
STARD5	hsa-mir-30c-2	CTD-2587H24.14	0.0121
STRIP1	hsa-mir-30c-2	AC084018.1	0.0121
STRIP1	hsa-mir-30c-2	CTD-2587H24.14	0.0121
TRIM4	hsa-mir-30c-2	CTD-2587H24.14	0.0121
USP22	hsa-mir-139	RP11-793H13.8	0.0121
WIPF2	hsa-mir-423	CTD-2587H24.14	0.0121
YTHDF1	hsa-mir-139	HYMAI	0.0121
YTHDF1	hsa-mir-139	TMX2-CTNND1	0.0121
ZNF70	hsa-mir-30c-2	CTD-2587H24.14	0.0121
ASB6	hsa-mir-320c-1	RP11-400F19.8	0.0122
CCNI	hsa-mir-423	AC135048.13	0.0122
CDC25B	hsa-let-7a-1	RP11-44M6.7	0.0122
CTDNEP1	hsa-mir-423	CHKB-CPT1B	0.0122
DNMT1	hsa-mir-30c-2	RP11-802E16.3	0.0122
EIF1AD	hsa-mir-30c-2	TP73-AS1	0.0122
GNB1	hsa-mir-132	RP11-2C24.4	0.0122
KLC2	hsa-mir-30c-2	TP73-AS1	0.0122
LARP1	hsa-let-7f-1	XXbac-BPG300A18.13	0.0122
LRCH4	hsa-mir-423	CTD-2587H24.14	0.0122
MTOR	hsa-mir-193a	RP11-793H13.8	0.0122
RNF122	hsa-mir-30c-2	RP11-802E16.3	0.0122
SOD2	hsa-let-7a-3	MALAT1	0.0122
TRIM4	hsa-mir-30c-2	AC084018.1	0.0122
ZDHHC20	hsa-mir-30e	MALAT1	0.0122
DUSP22	hsa-mir-139	HYMAI	0.0123
LARP1	hsa-let-7a-1	RP11-264B17.3	0.0123
RNF44	hsa-let-7a-1	RP11-264B17.3	0.0123
EPS15L1	hsa-mir-30c-2	TP73-AS1	0.0124
PRRC2A	hsa-mir-423	CTD-2587H24.14	0.0124
ABCA2	hsa-mir-320c-1	RAD51L3-RFFL	0.0126
NF2	hsa-mir-326	RP11-44M6.7	0.0126
RPAP1	hsa-mir-30c-2	TP73-AS1	0.0126
SFSWAP	hsa-let-7a-1	RP11-44M6.7	0.0126
WDR5	hsa-mir-30c-2	CTD-2587H24.14	0.0126
AATF	hsa-let-7b	MALAT1	0.0127
AGO1	hsa-mir-423	CTD-2587H24.14	0.0127
AGO2	hsa-mir-204	SENP3-EIF4A1	0.0127
EPS15L1	hsa-mir-30c-2	LOC100128288	0.0127
FAM193A	hsa-mir-326	INO80B-WBP1	0.0127
FAM222B	hsa-let-7a-1	HCP5	0.0127
FKBP8	hsa-let-7a-1	RP11-264B17.3	0.0127
HMG20A	hsa-mir-30c-2	AC084018.1	0.0127
KMT2D	hsa-let-7a-1	RP11-264B17.3	0.0127
KMT2D	hsa-let-7f-1	XXbac-BPG300A18.13	0.0127
MYC	hsa-mir-423	CTD-2587H24.14	0.0127
PARP16	hsa-let-7a-1	RP11-44M6.7	0.0127
PATZ1	hsa-mir-326	RUSC1-AS1	0.0127
PBX2	hsa-mir-326	INO80B-WBP1	0.0127
SHMT2	hsa-let-7a-1	XXbac-BPG300A18.13	0.0127
TRIM28	hsa-mir-423	CTD-2587H24.14	0.0127
WDR5	hsa-mir-30c-2	AC084018.1	0.0127
ZNF543	hsa-mir-30c-2	TP73-AS1	0.0127
ATXN2L	hsa-let-7a-1	RP11-264B17.3	0.0128
CCDC77	hsa-mir-30c-2	AC084018.1	0.0128
EEF2	hsa-let-7a-1	XXbac-BPG300A18.13	0.0128
PBX2	hsa-let-7a-1	HCP5	0.0128
TRAF7	hsa-mir-423	CHKB-CPT1B	0.0128
TRAFD1	hsa-mir-193a	RP11-793H13.8	0.0128
TUT1	hsa-mir-193a	TP73-AS1	0.0128
UNK	hsa-let-7a-1	XXbac-BPG300A18.13	0.0128
AGO2	hsa-mir-132	RP11-2C24.4	0.0129
COPS7A	hsa-mir-423	CTD-2587H24.14	0.0129
FAM193A	hsa-mir-326	RUSC1-AS1	0.0129
GGCX	hsa-mir-30c-2	RP11-158I13.2	0.0129
HAT1	hsa-let-7a-3	CTB-89H12.4	0.0129
MTFR1L	hsa-let-7a-1	RP11-264B17.3	0.0129
NFE2L1	hsa-mir-30c-2	LOC100128288	0.0129
NOTCH1	hsa-mir-204	SPECC1L-ADORA2A	0.0129
PCIF1	hsa-let-7a-1	XXbac-BPG300A18.13	0.0129
RHOF	hsa-mir-30c-2	CTD-2587H24.14	0.0129
RPAP1	hsa-mir-30c-2	LOC100128288	0.0129
SF3B4	hsa-mir-423	CTD-2587H24.14	0.0129
SIT1	hsa-mir-30c-2	RP11-802E16.3	0.0129
SLC35C1	hsa-mir-30c-2	LOC100128288	0.0129
SLC35C1	hsa-mir-30c-2	RP11-158I13.2	0.0129
TRIM28	hsa-mir-423	CHKB-CPT1B	0.0129
VPS39	hsa-mir-30c-2	RP11-802E16.3	0.0129
WDR45B	hsa-mir-423	AC135048.13	0.0129
WIZ	hsa-mir-423	CTD-2587H24.14	0.0129
ZNF543	hsa-mir-30c-2	RP11-158I13.2	0.0129
ALAS1	hsa-mir-423	CTD-2587H24.14	0.013
CDV3	hsa-let-7a-3	MALAT1	0.013
COX2	hsa-let-7a-3	MALAT1	0.013
EVI5L	hsa-mir-423	CTD-2587H24.14	0.013
GOLGA1	hsa-mir-30c-2	RP11-802E16.3	0.013
HGS	hsa-mir-423	CHKB-CPT1B	0.013
HKR1	hsa-mir-193a	RP11-793H13.8	0.013
HUWE1	hsa-mir-30c-2	CTD-2587H24.14	0.013
LPAR2	hsa-mir-423	CTD-2587H24.14	0.013
MRPS18B	hsa-mir-320c-1	RAD51L3-RFFL	0.013
PTGES2	hsa-let-7a-1	RP11-264B17.3	0.013
RHOF	hsa-mir-30c-2	AC084018.1	0.013
SBF1	hsa-mir-30c-2	TP73-AS1	0.013
SCAMP2	hsa-mir-423	CTD-2587H24.14	0.013
SF3A1	hsa-let-7a-1	XXbac-BPG300A18.13	0.013
SLC5A6	hsa-mir-139	TMX2-CTNND1	0.013
WIZ	hsa-mir-423	CHKB-CPT1B	0.013
ZNF609	hsa-let-7a-1	XXbac-BPG300A18.13	0.013
ATG9A	hsa-let-7a-1	RP11-264B17.3	0.0131
C2CD2	hsa-mir-320c-1	ZFP91-CNTF	0.0131
CDV3	hsa-let-7a-3	CTB-89H12.4	0.0131
CELF1	hsa-mir-30c-2	CTD-2587H24.14	0.0131
CIAPIN1	hsa-mir-139	HYMAI	0.0131
DDB1	hsa-mir-30c-2	TP73-AS1	0.0131
EIF4G2	hsa-let-7a-1	RP11-44M6.7	0.0131
FOXJ2	hsa-mir-423	CTD-2587H24.14	0.0131
LMBR1L	hsa-mir-30c-2	TP73-AS1	0.0131
SHMT2	hsa-let-7a-1	RP11-264B17.3	0.0131
TTC9C	hsa-mir-30c-2	AC084018.1	0.0131
ZMYM3	hsa-let-7a-1	RP11-44M6.7	0.0131
CELF1	hsa-mir-30c-2	AC084018.1	0.0132
EEF2	hsa-let-7a-1	RP11-264B17.3	0.0132
ELF4	hsa-let-7f-1	XXbac-BPG300A18.13	0.0132
EXOSC2	hsa-mir-30c-2	AC084018.1	0.0132
FASN	hsa-mir-423	CTD-2587H24.14	0.0132
GCSAM	hsa-mir-30c-2	CTD-2587H24.14	0.0132
NRBP1	hsa-mir-30c-2	TP73-AS1	0.0132
PCIF1	hsa-let-7a-1	RP11-264B17.3	0.0132
PPP1R11	hsa-mir-423	CTD-2587H24.14	0.0132
STAU1	hsa-mir-30c-2	CTD-2587H24.14	0.0132
TMUB1	hsa-mir-423	CTD-2587H24.14	0.0132
ZNF324	hsa-mir-423	CTD-2587H24.14	0.0132
ADD1	hsa-mir-320c-1	RAD51L3-RFFL	0.0134
AMMECR1L	hsa-mir-423	AC135048.13	0.0134
ATN1	hsa-mir-423	CTD-2587H24.14	0.0134
CEP104	hsa-mir-30c-2	AC084018.1	0.0134
EDC3	hsa-mir-30c-2	LOC100128288	0.0134
EDC3	hsa-mir-30c-2	TP73-AS1	0.0134
ESYT1	hsa-mir-30c-2	CTD-2587H24.14	0.0134
GCSAM	hsa-mir-30c-2	AC084018.1	0.0134
GNB1	hsa-mir-132	TMX2-CTNND1	0.0134
HYOU1	hsa-mir-193a	TP73-AS1	0.0134
INO80D	hsa-mir-193a	RP11-793H13.8	0.0134
KCTD2	hsa-mir-423	CTD-2587H24.14	0.0134
KDM6B	hsa-mir-423	GAS6-AS1	0.0134
MTA1	hsa-mir-423	CHKB-CPT1B	0.0134
MTHFR	hsa-mir-423	CTD-2587H24.14	0.0134
MYO9B	hsa-mir-193a	TP73-AS1	0.0134
PA2G4	hsa-mir-423	AC135048.13	0.0134
PI4KB	hsa-mir-23b	TP73-AS1	0.0134
SF3A1	hsa-let-7a-1	RP11-264B17.3	0.0134
SF3A1	hsa-let-7f-1	XXbac-BPG300A18.13	0.0134
SLC25A45	hsa-mir-30c-2	CTD-2587H24.14	0.0134
STAU1	hsa-mir-30c-2	AC084018.1	0.0134
SYNGR2	hsa-mir-423	CTD-2587H24.14	0.0134
U2AF2	hsa-mir-423	CTD-2587H24.14	0.0134
UBE2D3	hsa-mir-423	AC135048.13	0.0134
ZNF609	hsa-let-7a-1	RP11-264B17.3	0.0134
CSF1	hsa-mir-30c-2	LOC100128288	0.0135
DDOST	hsa-mir-30c-2	TP73-AS1	0.0135
DNMT1	hsa-mir-30c-2	CTD-2587H24.14	0.0135
DRAP1	hsa-mir-423	CTD-2587H24.14	0.0135
EDC3	hsa-mir-30c-2	RP11-158I13.2	0.0135
FAM222B	hsa-let-7a-1	XXbac-BPG300A18.13	0.0135
NOLC1	hsa-let-7f-1	XXbac-BPG300A18.13	0.0135
RPS6KB2	hsa-mir-193a	TP73-AS1	0.0135
SLC25A38	hsa-mir-30c-2	TP73-AS1	0.0135
STAU1	hsa-mir-132	RP11-2C24.4	0.0135
ANKRD40	hsa-mir-30c-2	TP73-AS1	0.0136
DRAP1	hsa-mir-423	CHKB-CPT1B	0.0136
E2F3	hsa-mir-139	HYMAI	0.0136
ESYT1	hsa-mir-30c-2	AC084018.1	0.0136
GTF2E1	hsa-let-7f-1	XXbac-BPG300A18.13	0.0136
MIER2	hsa-mir-423	CTD-2587H24.14	0.0136
PBX2	hsa-let-7a-1	XXbac-BPG300A18.13	0.0136
SLC25A45	hsa-mir-30c-2	AC084018.1	0.0136
TEX2	hsa-mir-423	AC135048.13	0.0136
DNMT1	hsa-mir-30c-2	AC084018.1	0.0137
DGCR2	hsa-mir-23b	TP73-AS1	0.0138
HEXA	hsa-mir-30c-2	AC084018.1	0.0138
IL21R	hsa-mir-30c-2	RP11-802E16.3	0.0138
JOSD1	hsa-mir-30c-2	TP73-AS1	0.0138
KLHL42	hsa-mir-30c-2	TP73-AS1	0.0138
MIER2	hsa-mir-423	CHKB-CPT1B	0.0138
MRPS18B	hsa-mir-320c-1	ZFP91-CNTF	0.0138
POLR3A	hsa-mir-125a	TP73-AS1	0.0138
SEMA4D	hsa-let-7a-1	XXbac-BPG300A18.13	0.0138
SLC25A38	hsa-mir-30c-2	RP11-158I13.2	0.0138
TP53	hsa-mir-194-2	RP11-77H9.2	0.0138
UBXN4	hsa-mir-30e	MALAT1	0.0138
URM1	hsa-mir-423	CTD-2587H24.14	0.0138
WASF2	hsa-mir-423	CTD-2587H24.14	0.0138
AGO2	hsa-mir-125a	TP73-AS1	0.0139
MEPCE	hsa-let-7a-1	RP11-264B17.3	0.0139
RPA2	hsa-mir-30c-2	TP73-AS1	0.0139
AGO2	hsa-mir-132	TMX2-CTNND1	0.014
PPARA	hsa-mir-30c-2	TP73-AS1	0.014
SH2B1	hsa-mir-423	CTD-2587H24.14	0.014
SPEN	hsa-mir-423	CTD-2587H24.14	0.014
WASF2	hsa-mir-423	CHKB-CPT1B	0.014
AAR2	hsa-mir-423	CHKB-CPT1B	0.0141
ASB6	hsa-mir-320c-1	RAD51L3-RFFL	0.0141
C7orf55-LUC7L2	hsa-mir-30e	MALAT1	0.0141
CDK12	hsa-mir-193a	RP11-793H13.8	0.0141
CHTF8	hsa-mir-423	CTD-2587H24.14	0.0141
FAM189B	hsa-mir-423	CTD-2587H24.14	0.0141
FAM222B	hsa-let-7a-1	RP11-264B17.3	0.0141
FAM222B	hsa-let-7f-1	XXbac-BPG300A18.13	0.0141
GOLGA1	hsa-mir-30c-2	CTD-2587H24.14	0.0141
KDM5B	hsa-mir-194-2	RP11-77H9.2	0.0141
KLHL42	hsa-mir-30c-2	LOC100128288	0.0141
KLHL42	hsa-mir-30c-2	RP11-158I13.2	0.0141
LUC7L2	hsa-mir-30e	MALAT1	0.0141
LYPLA2	hsa-mir-423	CTD-2587H24.14	0.0141
MFGE8	hsa-mir-423	CTD-2587H24.14	0.0141
NF2	hsa-mir-326	INO80B-WBP1	0.0141
PBX2	hsa-let-7a-1	RP11-264B17.3	0.0141
PBX2	hsa-let-7f-1	XXbac-BPG300A18.13	0.0141
PHF8	hsa-let-7a-1	HCP5	0.0141
PHF8	hsa-mir-326	RUSC1-AS1	0.0141
PLXND1	hsa-mir-423	ATP6V1G2-DDX39B	0.0141
POLL	hsa-mir-204	SPECC1L-ADORA2A	0.0141
RPA2	hsa-mir-30c-2	LOC100128288	0.0141
SIT1	hsa-mir-30c-2	AC084018.1	0.0141
SPATA2	hsa-mir-423	CTD-2587H24.14	0.0141
STARD5	hsa-mir-30c-2	LOC100128288	0.0141
STARD5	hsa-mir-30c-2	TP73-AS1	0.0141
STRIP1	hsa-mir-30c-2	LOC100128288	0.0141
STRIP1	hsa-mir-30c-2	TP73-AS1	0.0141
SUMF2	hsa-mir-30c-2	CTD-2587H24.14	0.0141
SYNE3	hsa-mir-132	AC012307.3	0.0141
TTL	hsa-mir-30c-2	AC084018.1	0.0141
TTL	hsa-mir-30c-2	CTD-2587H24.14	0.0141
TUSC2	hsa-mir-132	AC012307.3	0.0141
UPF1	hsa-mir-423	CHKB-CPT1B	0.0141
USP22	hsa-mir-139	HYMAI	0.0141
VPS39	hsa-mir-30c-2	CTD-2587H24.14	0.0141
WDR45B	hsa-mir-139	HYMAI	0.0141
ZNF70	hsa-mir-30c-2	TP73-AS1	0.0141
SEMA4D	hsa-let-7a-1	RP11-264B17.3	0.0142
VPS39	hsa-mir-30c-2	AC084018.1	0.0142
AARS2	hsa-mir-23b	TP73-AS1	0.0144
AGO2	hsa-let-7a-1	XXbac-BPG300A18.13	0.0144
ATG9A	hsa-mir-423	CTD-2587H24.14	0.0144
CDC25B	hsa-let-7a-1	HCP5	0.0144
DDX54	hsa-mir-423	CTD-2587H24.14	0.0144
DHX33	hsa-mir-125a	TP73-AS1	0.0144
DPF2	hsa-mir-204	SPECC1L-ADORA2A	0.0144
FBRSL1	hsa-mir-423	CHKB-CPT1B	0.0144
FBRSL1	hsa-mir-423	CTD-2587H24.14	0.0144
GCNT1	hsa-mir-132	RP11-2C24.4	0.0144
GNA12	hsa-mir-23b	TP73-AS1	0.0144
GOLGA1	hsa-mir-30c-2	AC084018.1	0.0144
HIPK2	hsa-mir-423	CTD-2587H24.14	0.0144
HMG20A	hsa-mir-30c-2	TP73-AS1	0.0144
LRCH4	hsa-mir-423	GAS6-AS1	0.0144
MAP3K3	hsa-mir-193a	TP73-AS1	0.0144
MAPK1IP1L	hsa-mir-320c-1	ZFP91-CNTF	0.0144
MLF2	hsa-mir-423	CTD-2517M22.14	0.0144
MTDH	hsa-mir-30e	MALAT1	0.0144
NF2	hsa-mir-326	RUSC1-AS1	0.0144
POPDC2	hsa-mir-214	HNRNPUL2-BSCL2	0.0144
RAB5B	hsa-mir-23b	TP73-AS1	0.0144
RABL2A	hsa-let-7a-1	XXbac-BPG300A18.13	0.0144
RABL2B	hsa-let-7a-1	XXbac-BPG300A18.13	0.0144
RBM15B	hsa-mir-423	CHKB-CPT1B	0.0144
RBM15B	hsa-mir-423	CTD-2587H24.14	0.0144
RIN3	hsa-mir-423	GAS6-AS1	0.0144
SHMT2	hsa-mir-423	CTD-2587H24.14	0.0144
SPEN	hsa-mir-23b	TP73-AS1	0.0144
SUMF2	hsa-mir-30c-2	AC084018.1	0.0144
SZT2	hsa-mir-423	CTD-2587H24.14	0.0144
VAC14	hsa-mir-423	GAS6-AS1	0.0144
WDR5	hsa-mir-30c-2	TP73-AS1	0.0144
ZC3H7B	hsa-mir-193a	TP73-AS1	0.0144
ZKSCAN3	hsa-mir-30c-2	AC084018.1	0.0144
AGO2	hsa-let-7a-1	RP11-264B17.3	0.0145
CCR7	hsa-let-7a-1	HCP5	0.0145
CMTM3	hsa-mir-132	AC012307.3	0.0145
MKNK2	hsa-mir-423	CHKB-CPT1B	0.0145
MKNK2	hsa-mir-423	CTD-2587H24.14	0.0145
MYC	hsa-mir-423	GAS6-AS1	0.0145
MYO1C	hsa-mir-204	SPECC1L-ADORA2A	0.0145
NECAP1	hsa-mir-423	CTD-2587H24.14	0.0145
NF2	hsa-mir-125a	TP73-AS1	0.0145
PRRC2A	hsa-mir-423	GAS6-AS1	0.0145
PRRC2B	hsa-mir-423	CTD-2587H24.14	0.0145
TPGS2	hsa-mir-423	AC135048.13	0.0145
ZNF623	hsa-mir-30c-2	TP73-AS1	0.0145
AGO1	hsa-mir-423	GAS6-AS1	0.0146
PPARGC1B	hsa-mir-423	CTD-2587H24.14	0.0146
RABL2A	hsa-let-7a-1	RP11-264B17.3	0.0146
RABL2B	hsa-let-7a-1	RP11-264B17.3	0.0146
RCE1	hsa-mir-423	CHKB-CPT1B	0.0146
TUBG1	hsa-mir-26a-1	SPECC1L-ADORA2A	0.0146
ZC3H4	hsa-mir-423	CTD-2587H24.14	0.0146
ZNF623	hsa-mir-30c-2	RP11-158I13.2	0.0146
NECAP1	hsa-mir-423	CHKB-CPT1B	0.0147
TTC9C	hsa-mir-30c-2	TP73-AS1	0.0147
AKT2	hsa-mir-423	CTD-2587H24.14	0.0148
CELF1	hsa-mir-30c-2	TP73-AS1	0.0148
DDX56	hsa-mir-423	CTD-2587H24.14	0.0148
GCSAM	hsa-mir-30c-2	TP73-AS1	0.0148
KMT2B	hsa-mir-423	GAS6-AS1	0.0148
PHF8	hsa-let-7a-1	XXbac-BPG300A18.13	0.0148
RAB5B	hsa-mir-132	AC012307.3	0.0148
SF3B3	hsa-mir-30c-2	CTD-2587H24.14	0.0148
TRRAP	hsa-let-7a-1	XXbac-BPG300A18.13	0.0148
WIZ	hsa-mir-423	GAS6-AS1	0.0148
ZC3H4	hsa-mir-423	CHKB-CPT1B	0.0148
ATXN2	hsa-let-7f-1	XXbac-BPG300A18.13	0.0149
BAZ2A	hsa-mir-193a	TP73-AS1	0.0149
CEP104	hsa-mir-30c-2	TP73-AS1	0.0149
DDX56	hsa-mir-423	CHKB-CPT1B	0.0149
ELMSAN1	hsa-mir-204	SPECC1L-ADORA2A	0.0149
ESYT1	hsa-mir-30c-2	TP73-AS1	0.0149
ETV6	hsa-mir-129-1	RP4-622L5.2	0.0149
FHOD1	hsa-mir-423	CTD-2517M22.14	0.0149
FMO4	hsa-let-7a-1	XXbac-BPG300A18.13	0.0149
GCSAM	hsa-mir-30c-2	RP11-158I13.2	0.0149
HNRNPUL1	hsa-let-7f-1	XXbac-BPG300A18.13	0.0149
IL21R	hsa-mir-30c-2	AC084018.1	0.0149
IL21R	hsa-mir-30c-2	CTD-2587H24.14	0.0149
MCM5	hsa-mir-423	CTD-2587H24.14	0.0149
NDUFS2	hsa-let-7a-3	MALAT1	0.0149
SF3B3	hsa-mir-30c-2	AC084018.1	0.0149
SF3B3	hsa-mir-423	AC135048.13	0.0149
SLC25A45	hsa-mir-30c-2	TP73-AS1	0.0149
STIM1	hsa-mir-423	CTD-2587H24.14	0.0149
TRIM41	hsa-mir-423	CHKB-CPT1B	0.0149
TTC9C	hsa-mir-30c-2	RP11-158I13.2	0.0149
TUBB	hsa-mir-320c-1	RAD51L3-RFFL	0.0149
ZMYM3	hsa-let-7a-1	HCP5	0.0149
ABL1	hsa-mir-423	CTD-2587H24.14	0.015
BAK1	hsa-mir-423	CTD-2587H24.14	0.015
CCR7	hsa-let-7a-1	XXbac-BPG300A18.13	0.015
CDC25B	hsa-let-7a-1	XXbac-BPG300A18.13	0.015
CYFIP2	hsa-mir-423	CTD-2587H24.14	0.015
DNMT1	hsa-mir-30c-2	LOC100128288	0.015
DNMT1	hsa-mir-30c-2	TP73-AS1	0.015
ESYT1	hsa-mir-30c-2	RP11-158I13.2	0.015
GCNT1	hsa-mir-132	TMX2-CTNND1	0.015
GGA3	hsa-mir-423	CTD-2517M22.14	0.015
GID8	hsa-mir-132	RP11-2C24.4	0.015
GOLGA1	hsa-mir-125a	TP73-AS1	0.015
HEXA	hsa-mir-30c-2	TP73-AS1	0.015
KBTBD6	hsa-mir-30c-2	CTD-2587H24.14	0.015
KLHL42	hsa-mir-193a	TP73-AS1	0.015
MAP3K3	hsa-mir-132	AC012307.3	0.015
MCM5	hsa-mir-423	CHKB-CPT1B	0.015
MTOR	hsa-mir-193a	TP73-AS1	0.015
NACC1	hsa-mir-423	CTD-2517M22.14	0.015
NDUFS2	hsa-let-7a-3	CTB-89H12.4	0.015
PARP16	hsa-let-7a-1	XXbac-BPG300A18.13	0.015
PHF8	hsa-let-7a-1	RP11-264B17.3	0.015
RIN3	hsa-mir-423	CTD-2517M22.14	0.015
SETD5	hsa-mir-30c-2	CTD-2587H24.14	0.015
SFSWAP	hsa-let-7a-1	XXbac-BPG300A18.13	0.015
SLC5A6	hsa-mir-423	CHKB-CPT1B	0.015
TMEM184B	hsa-mir-423	CTD-2587H24.14	0.015
TRRAP	hsa-let-7a-1	RP11-264B17.3	0.015
ULK1	hsa-mir-423	CTD-2517M22.14	0.015
ANKRD52	hsa-mir-423	CTD-2587H24.14	0.0151
ARHGEF2	hsa-mir-423	CTD-2517M22.14	0.0151
ARRB2	hsa-mir-423	ATP6V1G2-DDX39B	0.0151
BAK1	hsa-mir-423	CHKB-CPT1B	0.0151
CCNI	hsa-mir-423	CTD-2587H24.14	0.0151
CCR7	hsa-let-7a-1	RP11-264B17.3	0.0151
CDC25B	hsa-let-7a-1	RP11-264B17.3	0.0151
CIAO1	hsa-mir-193a	TP73-AS1	0.0151
CTDNEP1	hsa-mir-423	CTD-2517M22.14	0.0151
EIF3B	hsa-mir-423	CHKB-CPT1B	0.0151
EIF3B	hsa-mir-423	CTD-2587H24.14	0.0151
GOLGA1	hsa-mir-30c-2	TP73-AS1	0.0151
GPS1	hsa-mir-423	ATP6V1G2-DDX39B	0.0151
LARP1	hsa-mir-423	GAS6-AS1	0.0151
PELP1	hsa-mir-423	CTD-2587H24.14	0.0151
POLL	hsa-mir-423	GAS6-AS1	0.0151
SETD5	hsa-mir-30c-2	AC084018.1	0.0151
SF3B3	hsa-mir-326	INO80B-WBP1	0.0151
SF3B3	hsa-mir-326	RUSC1-AS1	0.0151
SPEN	hsa-mir-423	GAS6-AS1	0.0151
SUMF2	hsa-mir-30c-2	TP73-AS1	0.0151
TNRC6A	hsa-mir-23b	TP73-AS1	0.0151
TTL	hsa-mir-30c-2	TP73-AS1	0.0151
VPS39	hsa-mir-30c-2	RP11-158I13.2	0.0151
ZKSCAN3	hsa-mir-30c-2	TP73-AS1	0.0151
COPS7A	hsa-mir-423	CTD-2517M22.14	0.0152
DHTKD1	hsa-mir-125a	TP73-AS1	0.0152
GOLGA1	hsa-mir-30c-2	LOC100128288	0.0152
MFGE8	hsa-mir-423	GAS6-AS1	0.0152
NPEPPS	hsa-mir-423	GAS6-AS1	0.0152
PARP16	hsa-let-7a-1	RP11-264B17.3	0.0152
SFSWAP	hsa-let-7a-1	RP11-264B17.3	0.0152
WIZ	hsa-mir-423	CTD-2517M22.14	0.0152
ZMYM3	hsa-let-7a-1	XXbac-BPG300A18.13	0.0153
EIF4G2	hsa-let-7a-1	XXbac-BPG300A18.13	0.0154
SCAMP2	hsa-mir-423	CTD-2517M22.14	0.0154
ZKSCAN3	hsa-mir-30c-2	LOC100128288	0.0154
CSNK2A1	hsa-mir-193a	TP73-AS1	0.0155
FASN	hsa-mir-423	CTD-2517M22.14	0.0155
GID8	hsa-mir-132	TMX2-CTNND1	0.0155
GNB1	hsa-mir-132	AC012307.3	0.0155
HNRNPUL1	hsa-mir-423	CTD-2587H24.14	0.0155
RNF185	hsa-mir-423	CTD-2517M22.14	0.0155
RXRA	hsa-mir-423	ATP6V1G2-DDX39B	0.0155
ATG12	hsa-mir-23b	TP73-AS1	0.0156
ATP1A1	hsa-mir-23b	TP73-AS1	0.0156
EIF4G2	hsa-let-7f-1	XXbac-BPG300A18.13	0.0156
IL21R	hsa-mir-30c-2	TP73-AS1	0.0156
KDM6B	hsa-mir-423	ATP6V1G2-DDX39B	0.0156
MIDN	hsa-mir-423	ATP6V1G2-DDX39B	0.0156
RCE1	hsa-mir-423	GAS6-AS1	0.0156
SF3B3	hsa-mir-30c-2	LOC100128288	0.0156
SF3B3	hsa-mir-30c-2	TP73-AS1	0.0156
TRPM2	hsa-mir-423	ATP6V1G2-DDX39B	0.0156
ZMYM3	hsa-let-7a-1	RP11-264B17.3	0.0156
ZNF324	hsa-mir-423	CTD-2517M22.14	0.0156
AGO2	hsa-mir-132	AC012307.3	0.0157
EI24	hsa-mir-129-1	RP4-622L5.2	0.0157
FLNB	hsa-mir-9-1	RAD51L3-RFFL	0.0157
IL21R	hsa-mir-30c-2	LOC100128288	0.0157
MIER2	hsa-mir-423	CTD-2517M22.14	0.0157
POLL	hsa-mir-423	CTD-2517M22.14	0.0157
SEPT9	hsa-mir-423	GAS6-AS1	0.0157
SETD5	hsa-mir-139	HYMAI	0.0157
SETD5	hsa-mir-139	TMX2-CTNND1	0.0157
EMC1	hsa-mir-9-1	RAD51L3-RFFL	0.0158
NF2	hsa-mir-423	CTD-2587H24.14	0.0158
PA2G4	hsa-mir-423	CTD-2587H24.14	0.0158
UBE2D3	hsa-mir-423	CTD-2587H24.14	0.0158
URM1	hsa-mir-423	CTD-2517M22.14	0.0158
ZNF609	hsa-mir-423	GAS6-AS1	0.0158
AMMECR1L	hsa-mir-423	CTD-2587H24.14	0.0159
C15orf39	hsa-mir-423	ATP6V1G2-DDX39B	0.0159
CHTF8	hsa-mir-423	CTD-2517M22.14	0.0159
DAG1	hsa-mir-423	GAS6-AS1	0.0159
DHX33	hsa-mir-23b	TP73-AS1	0.0159
DONSON	hsa-mir-23b	TP73-AS1	0.0159
FHOD1	hsa-mir-423	ATP6V1G2-DDX39B	0.0159
FLII	hsa-mir-423	ATP6V1G2-DDX39B	0.0159
GGA3	hsa-mir-423	ATP6V1G2-DDX39B	0.0159
LRCH4	hsa-mir-423	ATP6V1G2-DDX39B	0.0159
MFGE8	hsa-mir-423	CTD-2517M22.14	0.0159
MICALL1	hsa-mir-423	CTD-2517M22.14	0.0159
MINK1	hsa-mir-423	ATP6V1G2-DDX39B	0.0159
MKNK2	hsa-mir-423	CTD-2517M22.14	0.0159
NFKB2	hsa-mir-423	ATP6V1G2-DDX39B	0.0159
POM121	hsa-mir-423	GAS6-AS1	0.0159
PRRC2A	hsa-mir-423	ATP6V1G2-DDX39B	0.0159
RNF187	hsa-mir-423	CTD-2517M22.14	0.0159
SETD5	hsa-mir-30c-2	LOC100128288	0.0159
TEX2	hsa-mir-423	CTD-2587H24.14	0.0159
ULK1	hsa-mir-423	ATP6V1G2-DDX39B	0.0159
UNK	hsa-mir-423	CTD-2517M22.14	0.0159
VAC14	hsa-mir-423	ATP6V1G2-DDX39B	0.0159
WASF2	hsa-mir-423	CTD-2517M22.14	0.0159
WIPF2	hsa-mir-423	ATP6V1G2-DDX39B	0.0159
CCNI	hsa-mir-423	GAS6-AS1	0.016
AGO1	hsa-mir-423	ATP6V1G2-DDX39B	0.0161
ALAS1	hsa-mir-423	ATP6V1G2-DDX39B	0.0161
COPS7A	hsa-mir-423	ATP6V1G2-DDX39B	0.0161
DDX56	hsa-mir-423	CTD-2517M22.14	0.0161
EMC1	hsa-mir-9-1	SPECC1L-ADORA2A	0.0161
FLNB	hsa-mir-9-1	SPECC1L-ADORA2A	0.0161
KMT2B	hsa-mir-423	ATP6V1G2-DDX39B	0.0161
LPAR2	hsa-mir-423	ATP6V1G2-DDX39B	0.0161
RUNX1	hsa-mir-423	CTD-2517M22.14	0.0161
SCAMP2	hsa-mir-423	ATP6V1G2-DDX39B	0.0161
SEPT6	hsa-mir-204	SPECC1L-ADORA2A	0.0161
SEPT9	hsa-mir-423	CTD-2517M22.14	0.0161
SETD5	hsa-mir-194-2	RP11-77H9.2	0.0161
STIM1	hsa-mir-423	CTD-2517M22.14	0.0161
TRIM41	hsa-mir-423	CTD-2517M22.14	0.0161
TTLL12	hsa-mir-423	ATP6V1G2-DDX39B	0.0161
ARFGAP1	hsa-mir-423	ATP6V1G2-DDX39B	0.0162
CCNI	hsa-mir-423	CTD-2517M22.14	0.0162
CHTF8	hsa-mir-423	ATP6V1G2-DDX39B	0.0162
CYFIP2	hsa-mir-423	CTD-2517M22.14	0.0162
EFHD2	hsa-mir-423	ATP6V1G2-DDX39B	0.0162
FOXJ2	hsa-mir-423	ATP6V1G2-DDX39B	0.0162
LARP1	hsa-mir-423	ATP6V1G2-DDX39B	0.0162
MIER2	hsa-mir-423	ATP6V1G2-DDX39B	0.0162
NAV1	hsa-mir-423	CTD-2517M22.14	0.0162
PBX2	hsa-mir-423	CTD-2517M22.14	0.0162
POM121	hsa-mir-423	CTD-2517M22.14	0.0162
SETD5	hsa-mir-423	CTD-2587H24.14	0.0162
SF3B3	hsa-mir-423	CHKB-CPT1B	0.0162
SF3B3	hsa-mir-423	CTD-2587H24.14	0.0162
SMARCD2	hsa-mir-423	ATP6V1G2-DDX39B	0.0162
SPEN	hsa-mir-423	ATP6V1G2-DDX39B	0.0162
TUBB	hsa-mir-423	CTD-2587H24.14	0.0162
U2AF2	hsa-mir-423	ATP6V1G2-DDX39B	0.0162
ZNF324	hsa-mir-423	ATP6V1G2-DDX39B	0.0162
LASP1	hsa-mir-423	ATP6V1G2-DDX39B	0.0163
SPATA2	hsa-mir-423	ATP6V1G2-DDX39B	0.0163
UPF1	hsa-mir-423	ATP6V1G2-DDX39B	0.0163
ABL1	hsa-mir-423	ATP6V1G2-DDX39B	0.0165
AMMECR1L	hsa-mir-423	ATP6V1G2-DDX39B	0.0165
ATG9A	hsa-mir-423	ATP6V1G2-DDX39B	0.0165
CD81	hsa-mir-423	ATP6V1G2-DDX39B	0.0165
CFL1	hsa-mir-2110	FLJ23867	0.0165
CYFIP2	hsa-mir-423	ATP6V1G2-DDX39B	0.0165
DDX54	hsa-mir-423	ATP6V1G2-DDX39B	0.0165
DDX56	hsa-mir-423	ATP6V1G2-DDX39B	0.0165
GID8	hsa-mir-132	AC012307.3	0.0165
HIPK2	hsa-mir-423	ATP6V1G2-DDX39B	0.0165
MKNK2	hsa-mir-423	ATP6V1G2-DDX39B	0.0165
NOLC1	hsa-mir-423	ATP6V1G2-DDX39B	0.0165
PA2G4	hsa-mir-423	ATP6V1G2-DDX39B	0.0165
PA2G4	hsa-mir-423	CTD-2517M22.14	0.0165
PML	hsa-mir-423	ATP6V1G2-DDX39B	0.0165
POM121	hsa-mir-423	ATP6V1G2-DDX39B	0.0165
RBM15B	hsa-mir-423	ATP6V1G2-DDX39B	0.0165
RUNX1	hsa-mir-423	ATP6V1G2-DDX39B	0.0165
SETD5	hsa-mir-423	CTD-2517M22.14	0.0165
SETD5	hsa-mir-423	GAS6-AS1	0.0165
SF3B3	hsa-mir-423	ATP6V1G2-DDX39B	0.0165
SH3GL1	hsa-mir-2110	FLJ23867	0.0165
SLC5A6	hsa-mir-423	ATP6V1G2-DDX39B	0.0165
STIM1	hsa-mir-423	ATP6V1G2-DDX39B	0.0165
TEX2	hsa-mir-423	ATP6V1G2-DDX39B	0.0165
TPGS2	hsa-mir-423	CTD-2517M22.14	0.0165
TRIM41	hsa-mir-423	ATP6V1G2-DDX39B	0.0165
TUBB	hsa-mir-423	ATP6V1G2-DDX39B	0.0165
TUBB	hsa-mir-423	CTD-2517M22.14	0.0165
UNK	hsa-mir-423	ATP6V1G2-DDX39B	0.0165
VAT1	hsa-mir-2110	FLJ23867	0.0165
ZC3H4	hsa-mir-423	ATP6V1G2-DDX39B	0.0165
ZNF609	hsa-mir-423	ATP6V1G2-DDX39B	0.0165
AHCTF1	hsa-let-7b	SNHG16	0.0166
ATM	hsa-mir-223	GAS5	0.0166
CIAPIN1	hsa-mir-2110	FLJ23867	0.0166
PLD3	hsa-let-7f-1	AC135048.13	0.0166
SP1	hsa-mir-2110	FLJ23867	0.0166
ZNF644	hsa-let-7b	SNHG16	0.0168
KPNA5	hsa-let-7f-2	SNHG1	0.0169
LZIC	hsa-mir-197	SNHG1	0.0169
RIF1	hsa-mir-30e	SNHG5	0.0169
KPNA5	hsa-let-7f-2	TUG1	0.017
MIER1	hsa-mir-30e	SNHG5	0.017
MTX3	hsa-let-7b	SNHG16	0.017
PLD3	hsa-let-7a-1	RP11-44M6.7	0.017
PTAFR	hsa-mir-186	TMX2-CTNND1	0.017
SH3GL1	hsa-mir-2110	ADAMTSL4-AS1	0.017
SUMO2	hsa-let-7b	SNHG16	0.017
SYNE2	hsa-let-7b	SNHG16	0.017
TET3	hsa-mir-2110	RP11-197N18.2	0.017
TPP1	hsa-mir-2110	FLJ23867	0.017
DPP8	hsa-mir-197	SNHG1	0.0171
NCOR2	hsa-mir-2110	FLJ23867	0.0171
SET	hsa-mir-197	SNHG1	0.0171
ATE1	hsa-let-7b	SNHG16	0.0174
CDKN1B	hsa-let-7b	SNHG16	0.0174
GOLGA4	hsa-let-7b	SNHG16	0.0174
GOLGA4	hsa-let-7a-3	SNHG16	0.0174
HSPA1B	hsa-mir-326	CTD-2587H24.14	0.0174
MIDN	hsa-let-7f-1	AC135048.13	0.0174
PDCD4	hsa-mir-197	SNHG1	0.0174
PKM	hsa-mir-30c-2	RP11-802E16.3	0.0174
PLD3	hsa-let-7f-1	XXbac-BPG300A18.13	0.0174
PLEKHA3	hsa-let-7b	SNHG16	0.0174
RBM34	hsa-let-7b	SNHG16	0.0174
RHOC	hsa-mir-2110	FLJ23867	0.0174
RIF1	hsa-mir-30e	GAS5	0.0174
SMCHD1	hsa-mir-221	GAS5	0.0174
SMN1	hsa-mir-21	HCP5	0.0174
SSX2IP	hsa-mir-221	GAS5	0.0174
TBC1D15	hsa-let-7b	SNHG16	0.0174
TNFRSF10D	hsa-mir-30c-2	TMEM256-PLSCR3	0.0174
WBP1L	hsa-mir-2110	FLJ23867	0.0174
WDR82	hsa-mir-30e	SNHG16	0.0174
WDR82	hsa-mir-30e	SNHG5	0.0174
ZNF708	hsa-mir-197	SNHG1	0.0174
DNAJB14	hsa-mir-221	GAS5	0.0175
DNASE2	hsa-mir-186	TMX2-CTNND1	0.0175
IDI1	hsa-let-7b	SNHG16	0.0175
IL6R	hsa-let-7d	FLJ23867	0.0175
MBNL1	hsa-mir-221	GAS5	0.0175
SLC25A32	hsa-let-7b	SNHG16	0.0175
SRCAP	hsa-mir-2110	FLJ23867	0.0175
ZBTB20	hsa-mir-21	HCP5	0.0175
ZNF644	hsa-let-7f-2	SNHG1	0.0175
PKM	hsa-mir-30c-2	CTD-2587H24.14	0.0176
ATM	hsa-mir-30e	GAS5	0.0177
LBR	hsa-let-7b	SNHG16	0.0177
MIDN	hsa-mir-2110	FLJ23867	0.0177
PLXND1	hsa-let-7a-1	RP11-44M6.7	0.0177
PLXND1	hsa-let-7f-1	RP11-44M6.7	0.0177
RPSA	hsa-let-7b	SNHG16	0.0177
SUDS3	hsa-mir-197	SNHG1	0.0177
VAT1	hsa-mir-2110	RTEL1-TNFRSF6B	0.0177
ELMOD2	hsa-let-7b	MALAT1	0.0179
FAM8A1	hsa-mir-30e	SNHG5	0.0179
PTPN6	hsa-mir-186	RP11-793H13.8	0.0179
SLC4A7	hsa-mir-30e	SNHG5	0.0179
TBC1D9B	hsa-let-7d	FLJ23867	0.0179
TRIM23	hsa-mir-30e	SNHG5	0.0179
LZIC	hsa-mir-197	CTC-559E9.4	0.018
PLD3	hsa-let-7a-1	XXbac-BPG300A18.13	0.018
ROCK2	hsa-mir-30e	SNHG5	0.018
UBA2	hsa-mir-197	SNHG1	0.018
GOLGA4	hsa-let-7a-3	GAS5	0.0181
RPRD2	hsa-mir-21	HCP5	0.0181
STK4	hsa-let-7b	SNHG16	0.0181
AZIN1	hsa-mir-30e	SNHG5	0.0182
DCUN1D1	hsa-mir-30e	SNHG5	0.0183
AGTRAP	hsa-mir-30c-2	CTD-2587H24.14	0.0185
EIF4A2	hsa-let-7b	SNHG16	0.0185
FIBP	hsa-mir-186	TMX2-CTNND1	0.0185
PLD3	hsa-let-7a-1	RP11-264B17.3	0.0185
RNF38	hsa-mir-21	HCP5	0.0185
SH3GL1	hsa-mir-2110	RP11-197N18.2	0.0185
SPECC1	hsa-mir-186	TMX2-CTNND1	0.0185
TMEM242	hsa-mir-30e	SNHG5	0.0185
UTRN	hsa-let-7b	MALAT1	0.0185
AGTRAP	hsa-mir-30c-2	AC084018.1	0.0186
HSPA1B	hsa-mir-326	RUSC1-AS1	0.0186
MGAT4A	hsa-mir-197	TUG1	0.0186
ZYX	hsa-mir-423	AC135048.13	0.0186
MAPK8	hsa-mir-30e	SNHG16	0.0187
CHST15	hsa-mir-30c-2	RP11-802E16.3	0.0188
DNAJC10	hsa-mir-185	SCARNA9	0.0188
LZIC	hsa-mir-197	TUG1	0.0188
PLD3	hsa-mir-30c-2	PPT2-EGFL8	0.0188
USP47	hsa-let-7a-3	SNHG16	0.0188
ZNF644	hsa-let-7f-2	TUG1	0.0188
ALMS1	hsa-mir-197	CTC-559E9.4	0.019
ARL6IP4	hsa-mir-186	HNRNPUL2-BSCL2	0.019
ATP6AP1	hsa-mir-30c-2	HYMAI	0.019
ATP6V0D1	hsa-mir-423	AC135048.13	0.019
CCNG1	hsa-mir-197	SNHG1	0.019
EIF4A2	hsa-let-7b	CTB-89H12.4	0.019
HSPA1B	hsa-mir-132	RP11-2C24.4	0.019
IL6R	hsa-let-7d	AC135048.13	0.019
INPPL1	hsa-mir-326	CTD-2587H24.14	0.019
KDM6B	hsa-let-7a-1	RP11-44M6.7	0.019
KIAA0930	hsa-let-7f-1	RP11-44M6.7	0.019
MAP3K2	hsa-mir-221	GAS5	0.019
NAP1L1	hsa-mir-30e	SNHG5	0.019
PDZD8	hsa-let-7b	SNHG16	0.019
PKM	hsa-mir-30c-2	LOC100128288	0.019
RBL1	hsa-mir-22	RP11-298P3.4	0.019
SF1	hsa-mir-21	HCP5	0.019
SH3GL1	hsa-mir-30c-2	HYMAI	0.019
SH3GL1	hsa-mir-2110	RP11-44M6.7	0.019
SYVN1	hsa-let-7a-1	RP11-44M6.7	0.019
TET3	hsa-mir-2110	RP11-44M6.7	0.019
TRIM37	hsa-mir-30e	SNHG16	0.019
WDR33	hsa-let-7b	CTB-89H12.4	0.019
ASCC3	hsa-let-7b	SNHG16	0.0191
ATP6AP1	hsa-mir-30c-2	TBC1D3P1-DHX40P1	0.0191
BTBD9	hsa-mir-30e	GAS5	0.0191
COPS8	hsa-mir-30e	SNHG16	0.0191
COX17	hsa-mir-186	TMX2-CTNND1	0.0191
GPS1	hsa-let-7f-1	RP11-44M6.7	0.0191
HNRNPDL	hsa-let-7b	SNHG16	0.0191
HSPE1-MOB4	hsa-let-7f-2	SNHG1	0.0191
IL6R	hsa-let-7f-1	RP11-44M6.7	0.0191
MOB4	hsa-let-7f-2	SNHG1	0.0191
RPL9	hsa-let-7a-3	SNHG16	0.0191
SH3GL1	hsa-mir-30c-2	TBC1D3P1-DHX40P1	0.0191
SLC1A5	hsa-mir-186	TMX2-CTNND1	0.0191
SMCHD1	hsa-mir-221	MALAT1	0.0191
SSX2IP	hsa-mir-221	MALAT1	0.0191
TRIM37	hsa-mir-30e	SNHG5	0.0191
USP37	hsa-mir-185	SCARNA9	0.0191
YTHDC1	hsa-mir-30e	SNHG16	0.0191
SET	hsa-mir-197	CTC-559E9.4	0.0192
TSPYL1	hsa-mir-30e	SNHG16	0.0192
YTHDC1	hsa-mir-30e	SNHG5	0.0192
ZNF644	hsa-let-7b	MALAT1	0.0192
CNPPD1	hsa-mir-186	TMX2-CTNND1	0.0193
KCTD21	hsa-let-7f-1	RP11-44M6.7	0.0193
SMCHD1	hsa-mir-221	RP11-108M9.3	0.0193
MBNL1	hsa-mir-30e	SNHG5	0.0194
PRKAB2	hsa-mir-21	RAD51L3-RFFL	0.0194
TSPYL1	hsa-mir-30e	SNHG5	0.0194
ARRDC1	hsa-mir-326	RP11-44M6.7	0.0195
SOCS7	hsa-let-7f-1	AC135048.13	0.0195
SYF2	hsa-let-7a-3	SNHG16	0.0195
ZNF644	hsa-let-7b	CTB-89H12.4	0.0195
BIRC6	hsa-let-7b	SNHG16	0.0197
CEP120	hsa-let-7b	SNHG16	0.0197
CNPPD1	hsa-mir-186	RP11-793H13.8	0.0197
MIDN	hsa-mir-423	AC135048.13	0.0197
PARVG	hsa-mir-30c-2	HYMAI	0.0197
PDCD4	hsa-mir-197	CTC-559E9.4	0.0197
SMN1	hsa-mir-21	RP11-77H9.2	0.0197
SRSF7	hsa-mir-30e	SNHG16	0.0197
DCAF12	hsa-mir-186	TMX2-CTNND1	0.0198
EIF4EBP2	hsa-mir-21	HCP5	0.0198
IREB2	hsa-mir-30e	SNHG5	0.0198
MAP2K7	hsa-let-7f-1	RP11-44M6.7	0.0198
SLC38A7	hsa-let-7f-1	AC135048.13	0.0198
TET3	hsa-mir-2110	SENP3-EIF4A1	0.0198
TRIM23	hsa-mir-30e	GAS5	0.0198
CCR7	hsa-mir-21	HCP5	0.0199
DPP8	hsa-mir-197	CTC-559E9.4	0.0199
RAB3GAP2	hsa-let-7b	SNHG16	0.0199
TWF1	hsa-mir-30e	GAS5	0.0199
AHCTF1	hsa-let-7b	GAS5	0.0202
HNRNPA1	hsa-mir-197	SNHG1	0.0202
ZBTB20	hsa-mir-21	RP11-77H9.2	0.0202
CCNG1	hsa-let-7b	SNHG16	0.0203
AGTRAP	hsa-mir-30c-2	LOC100128288	0.0204
ARID3A	hsa-mir-30c-2	HYMAI	0.0204
CCDC186	hsa-let-7b	SNHG16	0.0204
CHD1	hsa-let-7b	CTB-89H12.4	0.0204
CHD1	hsa-let-7b	MALAT1	0.0204
DCAF12	hsa-mir-186	RP11-793H13.8	0.0204
FNDC3A	hsa-let-7f-2	SNHG1	0.0204
HDAC5	hsa-let-7a-1	RP11-44M6.7	0.0204
ICA1L	hsa-mir-197	SNHG1	0.0204
IL6R	hsa-let-7a-1	RP11-44M6.7	0.0204
IRF2BP2	hsa-let-7f-1	AC135048.13	0.0204
KCTD21	hsa-let-7a-1	RP11-44M6.7	0.0204
KPNA5	hsa-let-7b	GAS5	0.0204
MLXIP	hsa-mir-30c-2	HYMAI	0.0204
MTF2	hsa-mir-30e	SNHG5	0.0204
PARVG	hsa-mir-30c-2	TBC1D3P1-DHX40P1	0.0204
PNKD	hsa-mir-30c-2	RP11-802E16.3	0.0204
PRKAG1	hsa-mir-186	TMX2-CTNND1	0.0204
RBM39	hsa-mir-221	GAS5	0.0204
RBMXL1	hsa-let-7a-3	GAS5	0.0204
SERBP1	hsa-let-7b	SNHG16	0.0204
ST6GAL1	hsa-mir-21	RP11-77H9.2	0.0204
TKT	hsa-mir-30c-2	HYMAI	0.0204
USP47	hsa-let-7a-3	GAS5	0.0204
XPO1	hsa-mir-30e	SNHG16	0.0204
ZMYM2	hsa-let-7b	SNHG16	0.0204
ANP32E	hsa-let-7b	SNHG16	0.0205
ARRDC1	hsa-mir-326	CTD-2587H24.14	0.0205
DDX6	hsa-mir-221	RP11-661A12.4	0.0205
DNAJB14	hsa-mir-221	MALAT1	0.0205
NPM3	hsa-mir-320c-1	RP11-400F19.8	0.0205
PDS5A	hsa-let-7b	SNHG16	0.0205
RPS8	hsa-mir-30e	SNHG16	0.0205
TMEM168	hsa-mir-221	GAS5	0.0205
TMEM33	hsa-let-7b	SNHG16	0.0205
XPO1	hsa-mir-30e	SNHG5	0.0205
AKR1A1	hsa-mir-186	HNRNPUL2-BSCL2	0.0206
ARID3A	hsa-mir-30c-2	TBC1D3P1-DHX40P1	0.0206
EFHD2	hsa-let-7f-1	AC135048.13	0.0206
HDGF	hsa-mir-30c-2	HYMAI	0.0206
MIB1	hsa-mir-30e	SNHG5	0.0206
MLXIP	hsa-mir-30c-2	TBC1D3P1-DHX40P1	0.0206
PDCD4	hsa-mir-197	TUG1	0.0206
PLD3	hsa-mir-30c-2	CTD-2587H24.14	0.0206
RPS8	hsa-mir-30e	SNHG5	0.0206
SLC39A1	hsa-mir-30c-2	HYMAI	0.0206
VAC14	hsa-mir-30c-2	CTD-2587H24.14	0.0206
EIF4A2	hsa-let-7b	GAS5	0.0207
SLC5A6	hsa-let-7f-1	AC135048.13	0.0207
TKT	hsa-mir-30c-2	TBC1D3P1-DHX40P1	0.0208
AKT1	hsa-mir-326	CTD-2587H24.14	0.0209
ATM	hsa-mir-30e	MALAT1	0.0209
FAM210A	hsa-mir-185	SCARNA9	0.0209
KRAS	hsa-mir-30e	SNHG5	0.0209
NCOR2	hsa-mir-2110	ADAMTSL4-AS1	0.0209
NUCKS1	hsa-let-7b	CTB-89H12.4	0.0209
PLXND1	hsa-let-7a-1	RP11-264B17.3	0.0209
RBM41	hsa-mir-197	JPX	0.0209
TBPL1	hsa-mir-30e	SNHG16	0.0209
TRAT1	hsa-mir-197	CTC-559E9.4	0.0209
ALDH3B1	hsa-mir-2110	SENP3-EIF4A1	0.021
BTG1	hsa-let-7b	SNHG16	0.021
GGA3	hsa-let-7a-1	AC135048.13	0.021
LRRC58	hsa-mir-197	SNHG1	0.021
PLEKHO2	hsa-mir-30c-2	HYMAI	0.021
RPL9	hsa-let-7a-3	GAS5	0.021
TROVE2	hsa-let-7b	SNHG16	0.021
FOSL2	hsa-mir-30c-2	CTD-2587H24.14	0.0211
GGA3	hsa-let-7f-1	RP11-44M6.7	0.0211
MAPK8	hsa-mir-30e	GAS5	0.0211
MTF1	hsa-mir-17	LOC100506472	0.0211
TAB2	hsa-let-7f-2	TUG1	0.0211
USP35	hsa-let-7a-1	AC135048.13	0.0211
AHCTF1	hsa-let-7b	SNHG1	0.0212
C19orf47	hsa-let-7f-1	AC135048.13	0.0212
CDC34	hsa-let-7a-1	RP11-44M6.7	0.0212
CEP135	hsa-let-7b	SNHG16	0.0212
FIBP	hsa-mir-186	HNRNPUL2-BSCL2	0.0212
FOSL2	hsa-mir-30c-2	AC084018.1	0.0212
ITPRIPL2	hsa-mir-320c-1	RP11-400F19.8	0.0212
PLXND1	hsa-let-7f-1	RP11-264B17.3	0.0212
RHBDF2	hsa-let-7f-1	AC135048.13	0.0212
SLC25A24	hsa-let-7b	SNHG16	0.0212
SLC25A44	hsa-mir-17	LOC100506472	0.0212
SUPT16H	hsa-let-7b	SNHG16	0.0212
TBPL1	hsa-mir-30e	SNHG5	0.0212
WDR82	hsa-mir-30e	GAS5	0.0212
ZC3H18	hsa-let-7a-1	AC135048.13	0.0212
ZC3H18	hsa-let-7f-1	RP11-44M6.7	0.0212
BRI3BP	hsa-let-7d	AC135048.13	0.0214
CIAPIN1	hsa-mir-2110	RTEL1-TNFRSF6B	0.0214
KIAA0930	hsa-let-7a-1	RP11-44M6.7	0.0214
NCOR2	hsa-mir-30c-2	TBC1D3P1-DHX40P1	0.0214
NKIRAS2	hsa-let-7a-1	RP11-44M6.7	0.0214
RPRD2	hsa-mir-21	RP11-77H9.2	0.0214
SEC11A	hsa-let-7b	SNHG16	0.0214
SHOC2	hsa-let-7b	SNHG16	0.0214
YTHDC1	hsa-let-7b	CTB-89H12.4	0.0214
ATXN2L	hsa-let-7f-1	AC135048.13	0.0215
CNTRL	hsa-let-7a-3	MALAT1	0.0215
DPP8	hsa-mir-197	MALAT1	0.0215
ECHDC1	hsa-let-7f-2	TUG1	0.0215
FLOT2	hsa-mir-423	CTD-2587H24.14	0.0215
KPNA5	hsa-let-7b	SNHG1	0.0215
NAP1L1	hsa-mir-30e	GAS5	0.0215
NCL	hsa-mir-221	RP11-661A12.4	0.0215
PARP1	hsa-mir-221	MALAT1	0.0215
PLEKHO2	hsa-mir-30c-2	TBC1D3P1-DHX40P1	0.0215
PNKD	hsa-mir-30c-2	CTD-2587H24.14	0.0215
RNF38	hsa-mir-21	RP11-77H9.2	0.0215
SHOC2	hsa-let-7a-3	SNHG16	0.0215
TKT	hsa-mir-30c-2	TP73-AS1	0.0215
TSEN15	hsa-let-7b	CTB-89H12.4	0.0215
YIPF4	hsa-mir-221	RP11-227G15.3	0.0215
ZNF813	hsa-mir-197	JPX	0.0215
BRI3BP	hsa-let-7f-1	RP11-44M6.7	0.0216
IL6R	hsa-let-7d	RP11-264B17.3	0.0216
MYADM	hsa-let-7f-1	AC135048.13	0.0216
MYC	hsa-let-7a-1	AC135048.13	0.0216
NKIRAS2	hsa-mir-2110	RP11-44M6.7	0.0216
PARP1	hsa-mir-221	RP11-108M9.3	0.0216
PRKAA1	hsa-mir-30e	SNHG5	0.0216
VAC14	hsa-mir-30c-2	HYMAI	0.0216
ZFP36L1	hsa-mir-30c-2	HYMAI	0.0216
KPNA5	hsa-mir-197	MALAT1	0.0217
LSM14A	hsa-mir-30e	SNHG16	0.0217
SLC35A4	hsa-let-7a-1	RP11-44M6.7	0.0217
ZNF813	hsa-mir-197	CTC-559E9.4	0.0217
AGO1	hsa-let-7f-1	RP11-44M6.7	0.0218
ATG9A	hsa-let-7f-1	AC135048.13	0.0218
CHD1	hsa-mir-30e	GAS5	0.0218
MYC	hsa-let-7f-1	RP11-44M6.7	0.0218
PCMTD1	hsa-let-7f-2	TUG1	0.0218
SLC39A1	hsa-mir-30c-2	LOC100128288	0.0218
DBT	hsa-mir-197	TUG1	0.022
G2E3	hsa-mir-331	MALAT1	0.022
TLN1	hsa-mir-30c-2	CTD-2587H24.14	0.022
EIF4A2	hsa-let-7b	SNHG1	0.0221
GTF2F1	hsa-mir-423	AC135048.13	0.0221
H6PD	hsa-mir-30c-2	RP11-802E16.3	0.0221
NAA35	hsa-let-7a-3	MALAT1	0.0221
RBM12B	hsa-let-7b	MALAT1	0.0221
SFXN1	hsa-mir-22	RP11-298P3.4	0.0221
SH3GL1	hsa-mir-30c-2	TMEM256-PLSCR3	0.0221
SPCS3	hsa-let-7b	SNHG1	0.0221
TLN1	hsa-mir-30c-2	AC084018.1	0.0221
YTHDC1	hsa-mir-30e	GAS5	0.0221
ZFP36L1	hsa-mir-30c-2	CTD-2587H24.14	0.0222
ARF3	hsa-mir-30c-2	RP11-802E16.3	0.0223
ATP6AP1	hsa-mir-30c-2	TMEM256-PLSCR3	0.0223
BRI3BP	hsa-mir-30c-2	HYMAI	0.0223
C19orf47	hsa-let-7f-1	RP11-44M6.7	0.0223
COX17	hsa-mir-186	HNRNPUL2-BSCL2	0.0223
DGKH	hsa-mir-30e	SNHG5	0.0223
GOLGA4	hsa-let-7b	MALAT1	0.0223
ITGA3	hsa-let-7f-1	AC135048.13	0.0223
MBNL1	hsa-mir-30e	GAS5	0.0223
MLLT1	hsa-mir-30c-2	HYMAI	0.0223
NAA35	hsa-let-7a-3	CTB-89H12.4	0.0223
NPM3	hsa-mir-320c-1	RAD51L3-RFFL	0.0223
PRIM2	hsa-let-7b	MALAT1	0.0223
RAB40C	hsa-let-7a-1	AC135048.13	0.0223
RAB40C	hsa-let-7f-1	RP11-44M6.7	0.0223
RHBDF2	hsa-let-7a-1	RP11-44M6.7	0.0223
RHBDF2	hsa-let-7f-1	RP11-44M6.7	0.0223
TBC1D15	hsa-let-7b	CTB-89H12.4	0.0223
TOR1AIP2	hsa-let-7b	CTB-89H12.4	0.0223
TSPYL1	hsa-mir-30e	GAS5	0.0223
TTLL12	hsa-mir-423	AC135048.13	0.0223
VAC14	hsa-mir-30c-2	TBC1D3P1-DHX40P1	0.0223
ZNF644	hsa-let-7a-3	MALAT1	0.0223
AGO1	hsa-mir-30c-2	HYMAI	0.0224
BRPF3	hsa-let-7f-1	AC135048.13	0.0224
CASD1	hsa-let-7f-2	RP11-227G15.3	0.0224
KIAA1143	hsa-let-7a-3	GAS5	0.0224
OPA3	hsa-let-7f-1	AC135048.13	0.0224
SLC38A7	hsa-mir-30c-2	HYMAI	0.0224
ZBTB34	hsa-mir-29a	MIR4697HG	0.0224
GPS1	hsa-mir-132	AP001372.2	0.0225
MTA1	hsa-mir-30c-2	CTD-2587H24.14	0.0225
NACC1	hsa-mir-30c-2	TBC1D3P1-DHX40P1	0.0225
TMPPE	hsa-mir-30c-2	HYMAI	0.0225
YIPF4	hsa-mir-197	CTC-559E9.4	0.0225
ZNF644	hsa-let-7a-3	CTB-89H12.4	0.0225
ATG5	hsa-mir-30e	GAS5	0.0226
CIZ1	hsa-mir-326	CTD-2587H24.14	0.0226
DUSP6	hsa-let-7f-1	AC135048.13	0.0226
KDM6B	hsa-let-7a-1	XXbac-BPG300A18.13	0.0226
LRCH4	hsa-mir-423	AC135048.13	0.0226
NONO	hsa-mir-197	SNHG1	0.0226
NOTCH1	hsa-mir-30c-2	TBC1D3P1-DHX40P1	0.0226
ABCF2	hsa-mir-326	CTD-2587H24.14	0.0227
FASN	hsa-mir-423	AC135048.13	0.0227
HBS1L	hsa-mir-197	TUG1	0.0227
IPO8	hsa-let-7b	MALAT1	0.0227
IPO8	hsa-let-7b	SNHG16	0.0227
LIMD2	hsa-let-7a-1	AC135048.13	0.0227
LIMD2	hsa-let-7f-1	RP11-44M6.7	0.0227
NIPBL	hsa-let-7b	SNHG16	0.0227
PLEKHA3	hsa-let-7b	CTB-89H12.4	0.0227
PPP1R10	hsa-let-7a-1	AC135048.13	0.0227
PPP1R10	hsa-let-7f-1	RP11-44M6.7	0.0227
RRP15	hsa-mir-221	RP11-661A12.4	0.0227
SUPT16H	hsa-mir-30e	SNHG5	0.0227
TSN	hsa-mir-221	RP11-227G15.3	0.0227
TSN	hsa-mir-221	RP11-661A12.4	0.0227
BRWD1	hsa-mir-331	MALAT1	0.0228
TBC1D9B	hsa-let-7d	RP11-264B17.3	0.0228
AK3	hsa-mir-197	SNHG1	0.0229
BRI3BP	hsa-mir-30c-2	TBC1D3P1-DHX40P1	0.0229
CDKN1B	hsa-let-7b	MALAT1	0.0229
HBP1	hsa-let-7b	GAS5	0.0229
KHSRP	hsa-mir-30c-2	TBC1D3P1-DHX40P1	0.0229
DVL3	hsa-let-7f-1	RP11-44M6.7	0.0231
MIDN	hsa-mir-2110	ADAMTSL4-AS1	0.0231
MTF2	hsa-mir-30e	GAS5	0.0231
POU2F2	hsa-mir-204	SENP3-EIF4A1	0.0231
AGO1	hsa-mir-30c-2	TBC1D3P1-DHX40P1	0.0232
ATE1	hsa-let-7b	MALAT1	0.0232
C2orf68	hsa-mir-197	JPX	0.0232
CBFB	hsa-let-7b	CTB-89H12.4	0.0232
CNNM4	hsa-mir-326	CTD-2587H24.14	0.0232
CYLD	hsa-mir-197	SNHG1	0.0232
KIAA0930	hsa-let-7f-1	RP11-264B17.3	0.0232
MAP3K2	hsa-mir-221	MALAT1	0.0232
MARK4	hsa-mir-30c-2	HYMAI	0.0232
MED16	hsa-mir-30c-2	AC084018.1	0.0232
NCKIPSD	hsa-let-7a-1	AC135048.13	0.0232
PDS5A	hsa-let-7b	MALAT1	0.0232
PGAM4	hsa-mir-423	AC135048.13	0.0232
POLL	hsa-let-7f-1	RP11-44M6.7	0.0232
SLC38A7	hsa-mir-30c-2	TBC1D3P1-DHX40P1	0.0232
TIMM10	hsa-mir-186	HNRNPUL2-BSCL2	0.0232
FAM91A1	hsa-mir-30e	SNHG5	0.0233
KDM6B	hsa-let-7a-1	RP11-264B17.3	0.0233
MTA1	hsa-mir-30c-2	HYMAI	0.0233
NCKIPSD	hsa-let-7f-1	RP11-44M6.7	0.0233
PAXBP1	hsa-let-7a-3	GAS5	0.0233
PDAP1	hsa-mir-186	HNRNPUL2-BSCL2	0.0233
SETD1B	hsa-mir-30c-2	TBC1D3P1-DHX40P1	0.0233
SYVN1	hsa-let-7a-1	RP11-264B17.3	0.0233
TKT	hsa-mir-30c-2	LOC100128288	0.0233
WIZ	hsa-mir-30c-2	TBC1D3P1-DHX40P1	0.0233
XPO1	hsa-mir-30e	GAS5	0.0233
ZNF543	hsa-mir-30c-2	RP11-802E16.3	0.0233
BZW1	hsa-let-7b	MALAT1	0.0234
CDKAL1	hsa-let-7f-2	TUG1	0.0234
CDV3	hsa-let-7a-3	SNHG16	0.0234
DPM2	hsa-mir-30c-2	HYMAI	0.0234
EVI5L	hsa-mir-423	AC135048.13	0.0234
GNAI2	hsa-mir-30c-2	HYMAI	0.0234
KCTD21	hsa-let-7f-1	XXbac-BPG300A18.13	0.0234
LARP1	hsa-let-7a-1	AC135048.13	0.0234
LARP1	hsa-let-7f-1	RP11-44M6.7	0.0234
MIB1	hsa-let-7b	CTB-89H12.4	0.0234
PARVG	hsa-mir-30c-2	TMEM256-PLSCR3	0.0234
PKM	hsa-mir-326	RUSC1-AS1	0.0234
RNF44	hsa-let-7a-1	AC135048.13	0.0234
RNF44	hsa-let-7f-1	RP11-44M6.7	0.0234
SH3GL1	hsa-mir-30c-2	PPT2-EGFL8	0.0234
TKT	hsa-mir-30c-2	CTD-2587H24.14	0.0234
TNF	hsa-mir-17	LOC100506472	0.0234
USP15	hsa-let-7b	SNHG16	0.0234
USP47	hsa-let-7b	GAS5	0.0234
ZBTB34	hsa-mir-29a	RP11-282O18.3	0.0234
ZYX	hsa-mir-423	RP4-785G19.5	0.0234
ATXN2L	hsa-mir-326	CTD-2587H24.14	0.0235
NOP58	hsa-mir-221	RP11-661A12.4	0.0235
GTF2E2	hsa-mir-30e	SNHG5	0.0236
HMGB1	hsa-let-7b	SNHG1	0.0236
PKM	hsa-let-7a-1	RP11-264B17.3	0.0237
TNRC6B	hsa-mir-195	RP11-96D1.10	0.0237
TUSC2	hsa-mir-132	RP11-2C24.4	0.0237
IDI1	hsa-let-7b	MALAT1	0.0238
PLD3	hsa-mir-30c-2	ZFP91-CNTF	0.0238
RBM39	hsa-mir-221	RP11-661A12.4	0.0238
ARPP19	hsa-let-7b	SNHG16	0.0239
DDX6	hsa-mir-331	MALAT1	0.0239
KDM2A	hsa-mir-30c-2	RP11-802E16.3	0.0239
ARID3A	hsa-mir-30c-2	RP11-802E16.3	0.024
IL6R	hsa-let-7f-1	RP11-498P14.3	0.024
MIB1	hsa-mir-30e	GAS5	0.024
GPS1	hsa-let-7f-1	RP11-264B17.3	0.0241
HECTD3	hsa-mir-30c-2	HYMAI	0.0241
ITPR2	hsa-mir-4793	SNHG5	0.0241
SH3GL1	hsa-mir-2110	MIRLET7BHG	0.0241
SLC25A32	hsa-let-7b	MALAT1	0.0241
ARID3A	hsa-mir-30c-2	TMEM256-PLSCR3	0.0242
GPI	hsa-mir-17	LOC100506472	0.0242
IL6R	hsa-let-7f-1	RP11-264B17.3	0.0242
KMT2D	hsa-let-7a-1	AC135048.13	0.0242
PDS5A	hsa-let-7b	GAS5	0.0242
MARK4	hsa-mir-30c-2	TBC1D3P1-DHX40P1	0.0243
MMS22L	hsa-let-7b	MALAT1	0.0243
PISD	hsa-mir-125a	TMX2-CTNND1	0.0243
H6PD	hsa-mir-30c-2	HYMAI	0.0244
IRF2BP2	hsa-let-7a-1	RP11-44M6.7	0.0244
KMT2D	hsa-let-7f-1	RP11-44M6.7	0.0244
MLXIP	hsa-mir-30c-2	TMEM256-PLSCR3	0.0244
AKT3	hsa-mir-195	RP11-96D1.10	0.0246
IDI1	hsa-let-7b	CTB-89H12.4	0.0246
IRAK1	hsa-mir-92a-1	RP11-400F19.8	0.0246
MTA1	hsa-mir-30c-2	TBC1D3P1-DHX40P1	0.0246
MTA1	hsa-mir-125a	TP73-AS1	0.0246
PPM1D	hsa-mir-30c-2	HYMAI	0.0246
RAVER1	hsa-let-7a-1	RP11-264B17.3	0.0246
SHOC2	hsa-let-7a-3	GAS5	0.0246
SLC25A32	hsa-let-7b	CTB-89H12.4	0.0246
TACO1	hsa-mir-30c-2	HYMAI	0.0246
TET3	hsa-mir-2110	MIRLET7BHG	0.0246
APPL1	hsa-let-7b	MALAT1	0.0247
DPM2	hsa-mir-30c-2	TBC1D3P1-DHX40P1	0.0247
EIF4EBP2	hsa-mir-21	RP11-77H9.2	0.0247
GNAI2	hsa-mir-30c-2	TBC1D3P1-DHX40P1	0.0247
GYS1	hsa-mir-326	CTD-2587H24.14	0.0247
IL6R	hsa-let-7a-1	XXbac-BPG300A18.13	0.0247
KCTD21	hsa-let-7f-1	RP11-264B17.3	0.0247
PER2	hsa-mir-30c-2	RP11-802E16.3	0.0247
PLEKHO2	hsa-mir-30c-2	LOC100128288	0.0247
SKI	hsa-mir-2110	FLJ23867	0.0247
SLC25A12	hsa-let-7b	SNHG16	0.0247
SMARCAD1	hsa-let-7f-2	RP11-227G15.3	0.0247
TKT	hsa-mir-30c-2	TMEM256-PLSCR3	0.0247
HDAC4	hsa-mir-30c-2	LOC100128288	0.0248
ZNF347	hsa-mir-23a	MGC27345	0.0248
GPS1	hsa-mir-423	RP4-785G19.5	0.0249
AGO1	hsa-let-7a-1	RP11-44M6.7	0.025
APPL1	hsa-let-7b	CTB-89H12.4	0.025
ARF3	hsa-mir-30c-2	AC084018.1	0.025
ARID3A	hsa-let-7f-1	RP11-264B17.3	0.025
ATRX	hsa-mir-331	MALAT1	0.025
BRI3BP	hsa-mir-30c-2	LOC100128288	0.025
BTF3L4	hsa-mir-197	CTC-559E9.4	0.025
CDKAL1	hsa-let-7f-2	RP11-227G15.3	0.025
DSN1	hsa-mir-30c-2	HYMAI	0.025
ECHDC1	hsa-let-7f-2	RP11-227G15.3	0.025
GBF1	hsa-let-7f-1	AC135048.13	0.025
HBP1	hsa-let-7a-3	MALAT1	0.025
HECTD3	hsa-mir-30c-2	TBC1D3P1-DHX40P1	0.025
INPPL1	hsa-mir-326	TP73-AS1	0.025
LARP1	hsa-mir-30c-2	HYMAI	0.025
LBR	hsa-let-7b	MALAT1	0.025
LIMK1	hsa-mir-30c-2	HYMAI	0.025
MAST3	hsa-mir-30c-2	HYMAI	0.025
MED16	hsa-mir-30c-1	AC084018.1	0.025
NCKIPSD	hsa-mir-30c-2	RP11-802E16.3	0.025
NOLC1	hsa-let-7a-1	RP11-44M6.7	0.025
SMARCA4	hsa-mir-139	HYMAI	0.025
SUMO2	hsa-let-7b	CTB-89H12.4	0.025
TANGO2	hsa-mir-30c-2	HYMAI	0.025
TBPL1	hsa-mir-30e	GAS5	0.025
TFAP4	hsa-mir-30c-2	RP11-802E16.3	0.025
ZNF644	hsa-let-7f-2	MALAT1	0.025
ATG9A	hsa-let-7f-1	RP11-44M6.7	0.0251
C7orf43	hsa-mir-30c-2	HYMAI	0.0251
NHLRC2	hsa-let-7f-2	RP11-227G15.3	0.0251
NR6A1	hsa-mir-15a	NCBP2-AS2	0.0251
SHMT2	hsa-let-7a-1	AC135048.13	0.0251
TPCN1	hsa-mir-23b	RP11-44M6.7	0.0251
ATP8B1	hsa-mir-197	MALAT1	0.0252
EEF2	hsa-let-7a-1	AC135048.13	0.0252
RAB5B	hsa-mir-30c-2	HYMAI	0.0252
TNKS2	hsa-mir-221	GAS5	0.0252
UNK	hsa-let-7a-1	AC135048.13	0.0252
ZFP14	hsa-mir-23a	AC000120.7	0.0252
KMT2D	hsa-mir-30c-2	HYMAI	0.0253
ARRB2	hsa-mir-423	RP4-785G19.5	0.0254
CD180	hsa-mir-30c-2	RP11-802E16.3	0.0254
HBP1	hsa-let-7a-3	CTB-89H12.4	0.0254
IKZF4	hsa-mir-30c-2	HYMAI	0.0254
LBR	hsa-let-7b	CTB-89H12.4	0.0254
PBX2	hsa-let-7f-1	AC135048.13	0.0254
PCIF1	hsa-let-7a-1	AC135048.13	0.0254
PDAP1	hsa-mir-30c-2	CTD-2587H24.14	0.0254
PLAGL2	hsa-let-7f-1	RP11-44M6.7	0.0254
RBM15B	hsa-mir-423	AC135048.13	0.0254
YTHDC1	hsa-let-7b	GAS5	0.0254
ZNF609	hsa-let-7f-1	AC135048.13	0.0254
ELF4	hsa-let-7f-1	RP11-44M6.7	0.0255
HDGF	hsa-mir-186	CTD-2587H24.14	0.0255
MAP2K7	hsa-let-7f-1	RP11-264B17.3	0.0255
SEMA4D	hsa-let-7f-1	AC135048.13	0.0255
SF3B3	hsa-mir-186	TMX2-CTNND1	0.0255
TLN1	hsa-mir-30c-2	LOC100128288	0.0255
CS	hsa-let-7a-1	RP11-44M6.7	0.0256
KIFAP3	hsa-mir-671	RMRP	0.0258
STRN3	hsa-mir-564	MALAT1	0.0258
HDAC5	hsa-let-7a-1	RP11-264B17.3	0.0259
IL6R	hsa-let-7a-1	RP11-264B17.3	0.0259
KCTD21	hsa-let-7a-1	RP11-264B17.3	0.0259
ARFGAP1	hsa-mir-30c-2	TBC1D3P1-DHX40P1	0.0261
BAHD1	hsa-mir-30c-2	TBC1D3P1-DHX40P1	0.0261
BRI3BP	hsa-let-7d	RP11-264B17.3	0.0261
EPN1	hsa-mir-423	CHKB-CPT1B	0.0261
LARP1	hsa-mir-30c-2	TBC1D3P1-DHX40P1	0.0261
LMBR1L	hsa-mir-30c-2	RP11-802E16.3	0.0261
MAST3	hsa-mir-30c-2	TBC1D3P1-DHX40P1	0.0261
MTA1	hsa-mir-30c-2	LOC100128288	0.0261
NCOR2	hsa-mir-30c-2	TMEM256-PLSCR3	0.0261
PARVG	hsa-mir-30c-2	PPT2-EGFL8	0.0261
RBM34	hsa-let-7b	SNHG1	0.0261
SF3A1	hsa-let-7a-1	AC135048.13	0.0261
TANGO2	hsa-mir-30c-2	TBC1D3P1-DHX40P1	0.0261
TBC1D10B	hsa-mir-30c-2	CTD-2587H24.14	0.0261
ZNF224	hsa-mir-671	SNHG3	0.0261
BCL6	hsa-mir-30b	TBC1D3P1-DHX40P1	0.0262
EIF1AD	hsa-mir-30c-2	HYMAI	0.0262
GABPB1	hsa-let-7b	GAS5	0.0262
LIMK1	hsa-mir-30c-2	TBC1D3P1-DHX40P1	0.0262
MAT2B	hsa-let-7b	MALAT1	0.0262
NKIRAS2	hsa-mir-2110	RTEL1-TNFRSF6B	0.0262
PRKAA1	hsa-mir-30e	GAS5	0.0262
RAB5B	hsa-mir-204	SENP3-EIF4A1	0.0262
RABL2A	hsa-let-7f-1	AC135048.13	0.0262
RABL2B	hsa-let-7f-1	AC135048.13	0.0262
SF3A1	hsa-let-7f-1	RP11-44M6.7	0.0262
SGSM2	hsa-mir-30c-2	CTD-2587H24.14	0.0262
SHISA5	hsa-mir-92a-1	RP11-400F19.8	0.0262
TBC1D10B	hsa-mir-30c-2	AC084018.1	0.0262
ZNF543	hsa-mir-30c-2	CTD-2587H24.14	0.0262
ZNF687	hsa-mir-30c-2	TBC1D3P1-DHX40P1	0.0262
IARS	hsa-let-7a-1	HCP5	0.0263
LARP1	hsa-let-7a-1	HCP5	0.0263
MIDN	hsa-let-7f-1	RP11-264B17.3	0.0263
NCOR2	hsa-mir-2110	RTEL1-TNFRSF6B	0.0263
PARVG	hsa-mir-30c-2	LOC100128288	0.0263
RXRA	hsa-mir-423	RP4-785G19.5	0.0263
SNRNP40	hsa-mir-30c-2	AC084018.1	0.0263
STK4	hsa-let-7b	MALAT1	0.0263
TRPM2	hsa-mir-423	AC135048.13	0.0263
ZNF609	hsa-let-7a-1	AC135048.13	0.0263
MRPL35	hsa-let-7f-1	AC135048.13	0.0264
PLEKHO2	hsa-mir-30c-2	CTD-2587H24.14	0.0264
SP100	hsa-let-7b	SNHG1	0.0264
BCOR	hsa-let-7f-1	AC135048.13	0.0265
C7orf43	hsa-mir-30c-2	TBC1D3P1-DHX40P1	0.0265
EPS15L1	hsa-mir-30c-2	HYMAI	0.0265
MAT2B	hsa-mir-106b	MALAT1	0.0265
NUCKS1	hsa-let-7b	GAS5	0.0265
PHF8	hsa-let-7f-1	AC135048.13	0.0265
SOD2	hsa-let-7a-3	GAS5	0.0265
TAX1BP1	hsa-mir-106b	MALAT1	0.0265
BAG5	hsa-let-7b	MALAT1	0.0266
CSNK1D	hsa-mir-30c-2	TBC1D3P1-DHX40P1	0.0266
ISCA1	hsa-mir-197	CTC-559E9.4	0.0266
PCYOX1L	hsa-mir-181c	TP73-AS1	0.0266
RPAP1	hsa-mir-30c-2	HYMAI	0.0266
BMI1	hsa-mir-30e	SNHG16	0.0267
BRPF3	hsa-let-7a-1	RP11-44M6.7	0.0267
BTF3L4	hsa-mir-197	TUG1	0.0267
IKZF4	hsa-mir-30c-2	TBC1D3P1-DHX40P1	0.0267
MAT2B	hsa-let-7b	CTB-89H12.4	0.0267
MLXIP	hsa-mir-30c-2	PPT2-EGFL8	0.0267
MYC	hsa-mir-30c-2	RP11-802E16.3	0.0267
ND5	hsa-let-7f-2	RP11-227G15.3	0.0267
NOLC1	hsa-let-7f-1	RP11-44M6.7	0.0267
PDS5A	hsa-let-7b	SNHG1	0.0267
PISD	hsa-mir-205	SENP3-EIF4A1	0.0267
PPP2R1A	hsa-mir-30c-2	CTD-2587H24.14	0.0267
SDR42E1	hsa-let-7a-1	HCP5	0.0267
SUPT16H	hsa-let-7b	GAS5	0.0267
YIPF4	hsa-mir-221	MALAT1	0.0267
ZNF543	hsa-mir-30c-2	HYMAI	0.0267
DHX8	hsa-mir-30c-2	HYMAI	0.0268
FASN	hsa-mir-30c-2	RP11-802E16.3	0.0268
MEPCE	hsa-let-7a-1	AC135048.13	0.0268
PPP2R1A	hsa-mir-30c-2	AC084018.1	0.0268
UBE2L3	hsa-mir-423	AC135048.13	0.0268
BMI1	hsa-mir-30e	SNHG5	0.0269
EP300	hsa-mir-30c-2	CTD-2587H24.14	0.0269
GOLGA4	hsa-let-7a-3	CTB-89H12.4	0.0269
KDM2A	hsa-mir-30c-2	CTD-2587H24.14	0.0269
AGO1	hsa-mir-326	RP11-44M6.7	0.027
DESI1	hsa-mir-30c-2	AC084018.1	0.027
FAM193A	hsa-mir-326	CTD-2587H24.14	0.0271
G2E3	hsa-let-7a-3	MALAT1	0.0271
HUWE1	hsa-let-7a-1	RP11-44M6.7	0.0271
KLC2	hsa-mir-30c-2	TBC1D3P1-DHX40P1	0.0271
MED16	hsa-mir-30c-2	TP73-AS1	0.0271
ZNF805	hsa-let-7b	MALAT1	0.0271
DGKH	hsa-mir-30e	GAS5	0.0272
DPM2	hsa-mir-125a	TP73-AS1	0.0272
EIF1AD	hsa-mir-30c-2	TBC1D3P1-DHX40P1	0.0272
EP300	hsa-mir-30c-2	AC084018.1	0.0272
KDM2A	hsa-mir-30c-2	AC084018.1	0.0272
NAP1L1	hsa-let-7b	MALAT1	0.0272
TP53	hsa-mir-30c-2	HYMAI	0.0272
ZNRF2	hsa-mir-197	MALAT1	0.0272
CREBL2	hsa-mir-186	HNRNPUL2-BSCL2	0.0273
KIFAP3	hsa-mir-671	MALAT1	0.0273
NKIRAS2	hsa-let-7a-1	XXbac-BPG300A18.13	0.0273
CPSF7	hsa-mir-30c-2	TP73-AS1	0.0274
DHX9	hsa-let-7b	GAS5	0.0274
EPS15L1	hsa-mir-30c-2	TBC1D3P1-DHX40P1	0.0274
FAM222B	hsa-let-7a-1	AC135048.13	0.0274
FASN	hsa-mir-326	RP11-44M6.7	0.0274
NAGPA	hsa-mir-193a	RP11-793H13.8	0.0274
PGAM1	hsa-mir-423	CTD-2587H24.14	0.0274
PLEKHM1	hsa-mir-138-1	SENP3-EIF4A1	0.0274
PTMA	hsa-mir-185	SCARNA9	0.0274
SGSM2	hsa-mir-30c-2	TBC1D3P1-DHX40P1	0.0274
TPCN1	hsa-mir-23b	RAD51L3-RFFL	0.0274
VAC14	hsa-mir-423	CTD-2587H24.14	0.0274
C19orf47	hsa-mir-30c-1	AC084018.1	0.0275
CDV3	hsa-let-7a-3	GAS5	0.0276
FAM222B	hsa-let-7f-1	RP11-44M6.7	0.0276
G2E3	hsa-let-7a-3	CTB-89H12.4	0.0276
GGCX	hsa-mir-30c-2	TBC1D3P1-DHX40P1	0.0276
HIC2	hsa-mir-30c-2	RP11-802E16.3	0.0276
MED16	hsa-mir-30c-1	INO80B-WBP1	0.0276
NDUFB10	hsa-mir-132	RP11-2C24.4	0.0276
PBX2	hsa-let-7f-1	RP11-44M6.7	0.0276
PFKL	hsa-mir-423	CTD-2587H24.14	0.0276
PNRC2	hsa-mir-221	MALAT1	0.0276
[truncated: 1,128 more rows]

## Sheet: Stage2
The identified 459 dysregulated LmiRM-CTs in stage 2 of MI (4-6 days after MI) using our method
mRNA	miRNA	lncRNA	p-value
BRD4	hsa-mir-2110	SENP3-EIF4A1	0.0001
GTPBP2	hsa-mir-2110	RP11-44M6.7	0.0001
HIC2	hsa-mir-2110	SENP3-EIF4A1	0.0001
KIAA0895L	hsa-mir-2110	RP11-44M6.7	0.0001
NCOR2	hsa-mir-2110	RP11-44M6.7	0.0001
VAT1	hsa-mir-2110	RP11-44M6.7	0.0001
HNRNPA3	hsa-mir-4793	SNHG5	0.0002
STX7	hsa-mir-4793	SNHG5	0.0002
KIAA0895L	hsa-mir-2110	RTEL1-TNFRSF6B	0.0004
NCOR2	hsa-mir-2110	RTEL1-TNFRSF6B	0.0004
NFIC	hsa-mir-2110	RTEL1-TNFRSF6B	0.0004
VAT1	hsa-mir-2110	RTEL1-TNFRSF6B	0.0004
FKBP8	hsa-mir-2110	RP11-44M6.7	0.0005
BRD4	hsa-mir-2110	RTEL1-TNFRSF6B	0.0006
SKI	hsa-mir-2110	RP11-44M6.7	0.0006
HBP1	hsa-let-7a-3	CTB-89H12.4	0.001
NAA35	hsa-let-7a-3	CTB-89H12.4	0.001
SMU1	hsa-mir-4793	SNHG5	0.001
G2E3	hsa-let-7a-3	CTB-89H12.4	0.0014
DICER1	hsa-let-7a-3	CTB-89H12.4	0.0015
MIB1	hsa-let-7a-3	CTB-89H12.4	0.0015
PAXBP1	hsa-let-7a-3	CTB-89H12.4	0.0015
SNX6	hsa-let-7a-3	CTB-89H12.4	0.0015
ATG4C	hsa-let-7a-3	CTB-89H12.4	0.0017
GOLGA4	hsa-let-7a-3	CTB-89H12.4	0.0017
SHOC2	hsa-let-7a-3	CTB-89H12.4	0.0017
KIAA0391	hsa-let-7a-3	CTB-89H12.4	0.0018
ZNF644	hsa-let-7a-3	CTB-89H12.4	0.0018
CDV3	hsa-let-7a-3	CTB-89H12.4	0.002
ECHDC1	hsa-let-7a-3	CTB-89H12.4	0.002
HAT1	hsa-let-7a-3	CTB-89H12.4	0.002
HNRNPU	hsa-let-7a-3	CTB-89H12.4	0.002
NIPBL	hsa-let-7a-3	CTB-89H12.4	0.002
RBL1	hsa-mir-22	RP11-298P3.4	0.002
SFT2D3	hsa-let-7a-3	CTB-89H12.4	0.002
TOR1AIP2	hsa-let-7a-3	CTB-89H12.4	0.002
NCOR2	hsa-mir-2110	ADAMTSL4-AS1	0.0023
SET	hsa-mir-197	SNHG1	0.0023
MIDN	hsa-mir-2110	RP11-44M6.7	0.0024
UQCRB	hsa-mir-197	SNHG1	0.0025
FKBP8	hsa-mir-2110	SENP3-EIF4A1	0.0028
ITPR2	hsa-mir-4793	SNHG5	0.0029
RPL9	hsa-mir-25	MALAT1	0.0032
ACTL6A	hsa-mir-25	MALAT1	0.0036
HBP1	hsa-let-7a-3	GAS5	0.0036
NCOR2	hsa-mir-2110	FLJ23867	0.0036
RRP15	hsa-mir-4793	SNHG5	0.0036
ZNF585A	hsa-let-7a-1	AP001372.2	0.0036
NAA35	hsa-let-7a-3	GAS5	0.0037
SRCAP	hsa-mir-2110	SENP3-EIF4A1	0.0037
G2E3	hsa-let-7a-3	GAS5	0.0039
PAXBP1	hsa-let-7a-3	GAS5	0.0039
SKI	hsa-mir-2110	SENP3-EIF4A1	0.0039
NFIC	hsa-mir-2110	RP11-44M6.7	0.004
BRD4	hsa-mir-2110	FLJ23867	0.0041
SRCAP	hsa-mir-2110	RP11-44M6.7	0.0041
MIB1	hsa-let-7a-3	GAS5	0.0042
CCNT2	hsa-let-7a-3	GAS5	0.0043
SLC29A1	hsa-mir-186	RP11-793H13.8	0.0045
YIPF4	hsa-mir-4793	SNHG5	0.0045
DNTTIP2	hsa-mir-25	RP11-618G20.1	0.0046
GOLGA4	hsa-let-7a-3	GAS5	0.0046
NUFIP2	hsa-mir-25	MALAT1	0.0046
SHOC2	hsa-let-7a-3	GAS5	0.0046
UBE4A	hsa-mir-326	RP4-622L5.2	0.0046
ACAP2	hsa-mir-4793	SNHG5	0.0047
ARL8B	hsa-let-7a-3	CTB-89H12.4	0.0047
ZNF644	hsa-let-7a-3	GAS5	0.0047
CFL1	hsa-mir-2110	RTEL1-TNFRSF6B	0.0048
FKBP8	hsa-mir-2110	FLJ23867	0.0048
UQCC1	hsa-mir-24-2	AC000120.7	0.0048
USP47	hsa-let-7a-3	CTB-89H12.4	0.0048
CDV3	hsa-let-7a-3	GAS5	0.0054
SRCAP	hsa-mir-2110	RTEL1-TNFRSF6B	0.0054
NIPBL	hsa-let-7a-3	GAS5	0.0069
VAT1	hsa-mir-2110	RP11-197N18.2	0.0069
FAM210A	hsa-mir-185	SCARNA9	0.0072
LDHB	hsa-mir-221	RP11-108M9.3	0.0072
PDCD4	hsa-mir-197	SNHG1	0.0072
ECSIT	hsa-mir-186	CTD-2587H24.14	0.0074
SLC25A36	hsa-mir-221	GAS5	0.0076
XIAP	hsa-mir-106b	MALAT1	0.0076
ALMS1	hsa-mir-197	SNHG1	0.0078
DNAJC10	hsa-mir-185	SCARNA9	0.0078
KIFAP3	hsa-mir-671	SNHG8	0.0078
MTAP	hsa-mir-23a	NPHP3-ACAD11	0.0081
MRPL35	hsa-let-7a-1	AP001372.2	0.0082
BTLA	hsa-mir-23a	NPHP3-ACAD11	0.0085
NUP62	hsa-mir-186	CTD-2587H24.14	0.0085
KIAA1143	hsa-let-7a-3	CTB-89H12.4	0.0087
ALDH3B1	hsa-mir-2110	SENP3-EIF4A1	0.0088
DBT	hsa-mir-197	SNHG1	0.0088
SFXN1	hsa-mir-22	RP11-298P3.4	0.0088
ZNF302	hsa-mir-197	SNHG1	0.0088
TMEM189-UBE2V1	hsa-mir-2110	RP11-44M6.7	0.0089
TMEM189	hsa-mir-2110	RP11-44M6.7	0.0089
UBE2V1	hsa-mir-2110	RP11-44M6.7	0.0089
RBM41	hsa-mir-197	SNHG1	0.0095
NCOR2	hsa-mir-2110	SENP3-EIF4A1	0.0096
TMED5	hsa-let-7a-3	CTB-89H12.4	0.0098
ALDH3B1	hsa-mir-2110	RP11-44M6.7	0.0099
TET3	hsa-mir-2110	SENP3-EIF4A1	0.0103
USP35	hsa-let-7a-1	AP001372.2	0.0103
LDHB	hsa-mir-221	MALAT1	0.0105
MAP2K7	hsa-let-7d	RP11-264B17.3	0.0107
TET3	hsa-mir-2110	RP11-44M6.7	0.0114
SKI	hsa-mir-2110	RTEL1-TNFRSF6B	0.0116
UBA2	hsa-mir-197	SNHG1	0.0116
CYP26B1	hsa-mir-15a	NCBP2-AS2	0.012
KPNA5	hsa-mir-197	SNHG1	0.012
MAP2K7	hsa-let-7d	AC135048.13	0.012
CUEDC2	hsa-mir-186	TMX2-CTNND1	0.0121
NAA35	hsa-let-7a-3	MALAT1	0.0123
SLC25A36	hsa-mir-221	RP11-227G15.3	0.0123
NCL	hsa-mir-197	SNHG1	0.013
MTO1	hsa-mir-23a	AC000120.7	0.0131
AK3	hsa-mir-197	SNHG1	0.0137
CLCC1	hsa-mir-149	CTC-338M12.4	0.0137
MRPS25	hsa-mir-149	CTC-338M12.4	0.0137
MAP2K7	hsa-let-7f-1	RP11-264B17.3	0.0138
CCNT2	hsa-let-7a-3	MALAT1	0.0139
NAA20	hsa-let-7a-3	CTB-89H12.4	0.0139
ZNF426	hsa-mir-138-1	RP11-158I13.2	0.0139
GOLGA4	hsa-let-7a-3	MALAT1	0.0145
MGAT4A	hsa-mir-197	SNHG1	0.0147
SP100	hsa-let-7b	CTB-89H12.4	0.0147
KRAS	hsa-mir-671	MALAT1	0.0148
CCNG1	hsa-let-7a-3	CTB-89H12.4	0.015
NOLC1	hsa-let-7a-1	RP11-498P14.3	0.0151
TNFSF12	hsa-mir-17	CTD-2587H24.14	0.0151
AK2	hsa-mir-149	CTC-338M12.4	0.0152
CIC	hsa-mir-92a-1	CTD-2587H24.14	0.0154
DEGS1	hsa-let-7a-3	CTB-89H12.4	0.0156
HMGB1	hsa-mir-4793	SNHG5	0.0156
KMT2D	hsa-let-7a-1	AP001372.2	0.0156
MAP2K7	hsa-let-7f-1	AC135048.13	0.0156
PPIL3	hsa-let-7b	SNHG1	0.0156
FOPNL	hsa-mir-4793	SNHG5	0.0159
GRAMD1A	hsa-mir-17	CTD-2587H24.14	0.0159
MNT	hsa-mir-17	LOC100506472	0.0159
PPIL3	hsa-let-7b	CTB-89H12.4	0.0159
TOR2A	hsa-mir-2110	SENP3-EIF4A1	0.0159
REXO1	hsa-mir-92a-1	CTD-2587H24.14	0.016
FASN	hsa-mir-92a-1	CTD-2587H24.14	0.0161
FASN	hsa-mir-17	CTD-2587H24.14	0.0161
SRCAP	hsa-mir-320c-1	RAD51L3-RFFL	0.0161
ZNF585A	hsa-let-7a-1	RP11-498P14.3	0.0161
ATG9A	hsa-let-7a-1	AP001372.2	0.0163
CDKN1B	hsa-let-7a-3	SNHG16	0.0163
SH3GL1	hsa-mir-2110	RTEL1-TNFRSF6B	0.0163
STK11IP	hsa-mir-17	CTD-2587H24.14	0.0163
GRAMD1A	hsa-mir-17	LOC100506472	0.0164
IQSEC1	hsa-mir-92a-1	CTD-2587H24.14	0.0164
IQSEC1	hsa-mir-17	CTD-2587H24.14	0.0164
ISY1	hsa-mir-671	MALAT1	0.0164
RBM34	hsa-let-7b	SNHG1	0.0164
SH3GL1	hsa-mir-2110	RP11-197N18.2	0.0164
TESK1	hsa-mir-92a-1	CTD-2587H24.14	0.0164
SESN2	hsa-mir-17	LOC100506472	0.0165
RBM34	hsa-let-7b	CTB-89H12.4	0.0166
YIPF6	hsa-mir-195	CTC-338M12.4	0.017
ZNF446	hsa-mir-17	LOC100506472	0.017
SHOC2	hsa-let-7a-3	SNHG16	0.0172
KRAS	hsa-let-7a-3	CTB-89H12.4	0.0175
TMEM161A	hsa-mir-92a-1	CTD-2587H24.14	0.0175
STK11IP	hsa-mir-17	LOC100506472	0.0176
FAM208A	hsa-mir-671	MALAT1	0.0178
NIPBL	hsa-let-7a-3	MALAT1	0.0178
HGH1	hsa-mir-92a-1	CTD-2587H24.14	0.0179
TAB2	hsa-let-7a-3	MALAT1	0.0179
COPS2	hsa-let-7b	CTB-89H12.4	0.0181
DENND4B	hsa-mir-92a-1	CTD-2587H24.14	0.0181
KDM1A	hsa-mir-23b	RP1-59M18.2	0.0181
ATXN2L	hsa-mir-92a-1	CTD-2587H24.14	0.0187
KDM1A	hsa-mir-23b	NPHP3-ACAD11	0.0187
POLR3A	hsa-mir-125a	RP11-158I13.2	0.0189
XIAP	hsa-mir-106b	CTB-89H12.4	0.0189
PHF8	hsa-mir-326	RP4-622L5.2	0.0191
ICA1L	hsa-mir-197	SNHG1	0.0194
PPIL3	hsa-let-7a-3	CTB-89H12.4	0.0194
BNIP2	hsa-mir-106b	CTB-89H12.4	0.0195
FASN	hsa-mir-92a-1	RP11-400F19.8	0.0195
NIPBL	hsa-let-7a-3	SNHG16	0.0195
PAK4	hsa-mir-18a	RP11-44N21.4	0.0195
MAP3K2	hsa-mir-106b	CTB-89H12.4	0.0196
MTF1	hsa-mir-20a	INO80B-WBP1	0.0197
MTF1	hsa-mir-17	INO80B-WBP1	0.0197
AMD1	hsa-let-7a-3	CTB-89H12.4	0.0198
KCTD21	hsa-let-7a-1	AP001372.2	0.0199
FAM210A	hsa-mir-106b	CTB-89H12.4	0.0204
TESK1	hsa-mir-92a-1	RP11-400F19.8	0.0204
GOSR2	hsa-mir-326	RP4-622L5.2	0.0206
GYS1	hsa-mir-20a	INO80B-WBP1	0.0206
TMEM127	hsa-mir-20a	INO80B-WBP1	0.0207
TMEM127	hsa-mir-17	INO80B-WBP1	0.0207
SHISA5	hsa-mir-92a-1	RP11-400F19.8	0.021
TNFSF12	hsa-mir-17	INO80B-WBP1	0.021
CDKN1B	hsa-let-7a-3	CTB-89H12.4	0.0214
DENND4B	hsa-mir-92a-1	RP11-400F19.8	0.0214
GRAMD1A	hsa-mir-17	INO80B-WBP1	0.0214
GRAMD1A	hsa-mir-20a	INO80B-WBP1	0.0214
HNRNPA3	hsa-mir-4793	MALAT1	0.0214
ZBTB7B	hsa-mir-18a	RP11-44N21.4	0.0214
FASN	hsa-mir-17	INO80B-WBP1	0.0215
SUGT1	hsa-mir-4793	MALAT1	0.0215
ZNF609	hsa-let-7d	XXbac-BPG300A18.13	0.0215
NUP98	hsa-mir-326	RP4-622L5.2	0.0216
STK11IP	hsa-mir-20a	INO80B-WBP1	0.0216
STK11IP	hsa-mir-17	INO80B-WBP1	0.0216
TP53	hsa-mir-2110	RP11-44M6.7	0.0217
CPTP	hsa-mir-92a-1	RP11-400F19.8	0.0219
POLR3A	hsa-mir-125a	SPECC1L-ADORA2A	0.022
PSMA2	hsa-let-7a-3	CTB-89H12.4	0.022
HLX	hsa-mir-2110	ADAMTSL4-AS1	0.0223
HLX	hsa-mir-2110	FLJ23867	0.0223
MAT2A	hsa-mir-21	HCP5	0.0224
MIDN	hsa-mir-2110	ADAMTSL4-AS1	0.0225
PRKAB2	hsa-mir-21	HCP5	0.0225
ATM	hsa-mir-223	GAS5	0.0228
VAT1	hsa-mir-2110	ADAMTSL4-AS1	0.0228
RHOC	hsa-mir-2110	FLJ23867	0.0231
MIDN	hsa-mir-2110	FLJ23867	0.0233
RHOC	hsa-mir-2110	RTEL1-TNFRSF6B	0.0233
RLIM	hsa-mir-25	MALAT1	0.0233
USP47	hsa-let-7a-3	GAS5	0.0233
TBC1D15	hsa-mir-25	MALAT1	0.0235
CNEP1R1	hsa-mir-25	MALAT1	0.0236
OSCAR	hsa-mir-186	RP11-793H13.8	0.0236
PPP1CC	hsa-mir-185	SCARNA9	0.0236
VAT1	hsa-mir-2110	FLJ23867	0.0236
RBL1	hsa-mir-22	JPX	0.0237
CDKN1B	hsa-let-7a-3	GAS5	0.0239
CCNG1	hsa-let-7a-3	GAS5	0.0244
HIC2	hsa-mir-2110	ADAMTSL4-AS1	0.0244
HNRNPA1	hsa-mir-197	SNHG1	0.0244
RLIM	hsa-mir-25	RP11-618G20.1	0.0244
TRAF3IP1	hsa-mir-4793	SNHG5	0.0245
SKI	hsa-mir-2110	FLJ23867	0.0248
SRCAP	hsa-mir-2110	FLJ23867	0.0248
ALDH5A1	hsa-mir-23a	NPHP3-ACAD11	0.025
HNRNPDL	hsa-let-7a-3	GAS5	0.0253
HDGF	hsa-mir-186	CTD-2587H24.14	0.0255
RPL9	hsa-let-7a-3	GAS5	0.0255
PLD3	hsa-let-7a-1	AC135048.13	0.0256
SLK	hsa-mir-106b	MALAT1	0.0262
UBXN6	hsa-mir-186	RP11-793H13.8	0.0262
PWP2	hsa-mir-181b-1	AP000320.7	0.0267
ST6GAL1	hsa-mir-21	RAD51L3-RFFL	0.0267
UBXN6	hsa-mir-186	CTD-2587H24.14	0.0267
ALDH3B1	hsa-mir-2110	ADAMTSL4-AS1	0.027
ZBTB24	hsa-mir-23a	NPHP3-ACAD11	0.027
ZNF703	hsa-mir-2110	MIRLET7BHG	0.027
RLIM	hsa-mir-106b	MALAT1	0.0272
DNTTIP2	hsa-mir-25	MALAT1	0.0277
FICD	hsa-mir-17	HCP5	0.0286
FICD	hsa-mir-20a	HCP5	0.0286
RNF40	hsa-mir-186	CTD-2587H24.14	0.0287
ATG14	hsa-mir-671	SNHG8	0.029
MARK2	hsa-mir-2110	FLJ23867	0.029
LDHB	hsa-mir-197	MALAT1	0.0292
PTAR1	hsa-mir-21	RP11-77H9.2	0.0292
TET3	hsa-mir-2110	ADAMTSL4-AS1	0.0292
TOR2A	hsa-mir-2110	MIRLET7BHG	0.0292
KIAA0391	hsa-let-7a-3	GAS5	0.0294
AGO3	hsa-mir-23a	MGC27345	0.0295
ALG9	hsa-mir-23a	NPHP3-ACAD11	0.0295
OGFOD1	hsa-mir-23a	MGC27345	0.0295
ZNF224	hsa-mir-671	SNHG8	0.0295
ZNF609	hsa-let-7d	AC135048.13	0.0295
DCUN1D1	hsa-mir-106b	MALAT1	0.0297
EBNA1BP2	hsa-mir-30c-2	HNRNPUL2-BSCL2	0.0301
G2E3	hsa-let-7a-3	MALAT1	0.0301
KPNA5	hsa-let-7b	MALAT1	0.0302
BRD4	hsa-mir-2110	MIRLET7BHG	0.0303
DAGLB	hsa-mir-186	RP11-793H13.8	0.0303
MIDN	hsa-let-7a-1	AC135048.13	0.0303
MTF1	hsa-mir-92a-1	HCP5	0.0303
MTF1	hsa-mir-17	HCP5	0.0303
MTF1	hsa-mir-20a	HCP5	0.0303
TNPO1	hsa-mir-22	RP11-227G15.3	0.0303
TMEM189-UBE2V1	hsa-mir-2110	RTEL1-TNFRSF6B	0.0305
TMEM189	hsa-mir-2110	RTEL1-TNFRSF6B	0.0305
TMEM19	hsa-mir-24-2	AC000120.7	0.0305
UBE2V1	hsa-mir-2110	RTEL1-TNFRSF6B	0.0305
TMEM189-UBE2V1	hsa-mir-2110	FLJ23867	0.0308
TMEM189	hsa-mir-2110	FLJ23867	0.0308
UBE2V1	hsa-mir-2110	FLJ23867	0.0308
TMED4	hsa-mir-22	RP11-298P3.4	0.031
MIB1	hsa-let-7b	GAS5	0.0311
PAXBP1	hsa-let-7a-3	MALAT1	0.0311
PPARGC1B	hsa-mir-186	CTD-2587H24.14	0.0312
CYLD	hsa-mir-197	SNHG1	0.0314
CIZ1	hsa-let-7d	RP11-264B17.3	0.032
CFL1	hsa-mir-2110	FLJ23867	0.0321
NAP1L1	hsa-mir-30e	SNHG5	0.0322
LDHB	hsa-mir-221	GAS5	0.0328
ALDH3B1	hsa-mir-2110	FLJ23867	0.033
KPNA5	hsa-let-7b	GAS5	0.033
NCOR2	hsa-mir-2110	MIRLET7BHG	0.033
SHOC2	hsa-mir-4793	SNHG5	0.0338
AGO3	hsa-mir-23a	NPHP3-ACAD11	0.0341
MRPL35	hsa-let-7a-1	AC135048.13	0.0341
PAXBP1	hsa-let-7a-3	SNHG16	0.0344
SFXN1	hsa-mir-22	RP11-227G15.3	0.0345
HIC2	hsa-mir-2110	MIRLET7BHG	0.0346
ZC3H18	hsa-let-7a-1	AC135048.13	0.0346
PDE12	hsa-let-7b	SNHG1	0.0347
SMCHD1	hsa-mir-221	GAS5	0.0347
TROVE2	hsa-let-7b	MALAT1	0.0347
CIZ1	hsa-let-7d	AC135048.13	0.0348
MIB1	hsa-let-7b	CTB-89H12.4	0.0348
CCDC186	hsa-let-7b	GAS5	0.0352
KMT2D	hsa-let-7d	RP11-264B17.3	0.0355
CEP135	hsa-let-7b	SNHG1	0.0356
GTF2E2	hsa-mir-30e	SNHG5	0.0357
AGO1	hsa-mir-320c-1	RAD51L3-RFFL	0.0358
KPNA5	hsa-let-7b	SNHG1	0.0358
NR6A1	hsa-mir-15a	NCBP2-AS2	0.0358
MRPS2	hsa-let-7a-1	AC135048.13	0.0359
NUP98	hsa-mir-326	CTD-2587H24.14	0.0359
RAVER1	hsa-let-7a-1	AC135048.13	0.0359
CARM1	hsa-mir-92a-1	CTD-2587H24.14	0.0362
IL6R	hsa-let-7a-1	AC135048.13	0.0362
KIFAP3	hsa-mir-671	MALAT1	0.0362
MARK2	hsa-mir-2110	RTEL1-TNFRSF6B	0.0362
SCNM1	hsa-mir-30c-2	HNRNPUL2-BSCL2	0.0362
NCEH1	hsa-mir-2110	FLJ23867	0.0364
ADD1	hsa-mir-320c-1	RAD51L3-RFFL	0.0365
KRAS	hsa-let-7a-3	GAS5	0.0365
MFSD11	hsa-mir-125a	CDKN2B-AS1	0.0365
SH3GLB1	hsa-let-7b	MALAT1	0.0365
BAG6	hsa-mir-92a-1	CTD-2587H24.14	0.0366
SHOC2	hsa-let-7a-3	MALAT1	0.0366
SLC4A2	hsa-mir-92a-1	CTD-2587H24.14	0.0366
IL6R	hsa-let-7d	FLJ23867	0.0367
USP47	hsa-let-7a-3	SNHG16	0.0369
LY6G5B	hsa-mir-92a-1	CTD-2587H24.14	0.0372
LY6G5B	hsa-mir-17	CTD-2587H24.14	0.0372
HNRNPD	hsa-mir-221	GAS5	0.0373
IL6R	hsa-let-7d	AC135048.13	0.038
KIFAP3	hsa-mir-671	SNHG3	0.038
PAIP1	hsa-mir-25	MALAT1	0.038
TNFAIP8	hsa-mir-23a	NPHP3-ACAD11	0.038
TROVE2	hsa-let-7b	GAS5	0.038
PLXND1	hsa-let-7a-1	AC135048.13	0.0381
PLXND1	hsa-let-7d	AC135048.13	0.0384
FAM222B	hsa-let-7d	FLJ23867	0.0388
SPCS3	hsa-let-7b	SNHG1	0.039
HNRNPU	hsa-let-7b	CTB-89H12.4	0.0394
LY6G5B	hsa-mir-17	LOC100506472	0.0394
SKI	hsa-mir-2110	MIRLET7BHG	0.0394
STK25	hsa-mir-186	CTD-2587H24.14	0.0398
TNPO1	hsa-mir-22	RP11-298P3.4	0.0398
TWF1	hsa-mir-30e	SNHG5	0.0398
ZNF629	hsa-mir-186	RP11-793H13.8	0.0398
PLXNB2	hsa-mir-186	TMX2-CTNND1	0.0399
SP100	hsa-let-7b	SNHG1	0.0399
RNMT	hsa-let-7b	MALAT1	0.0401
SFXN1	hsa-mir-22	JPX	0.0407
TNPO1	hsa-mir-22	JPX	0.0408
NKIRAS2	hsa-mir-2110	FLJ23867	0.041
PLD3	hsa-let-7d	RP11-264B17.3	0.041
ZNF629	hsa-mir-186	CTD-2587H24.14	0.0413
CDK8	hsa-mir-195	C1QTNF3-AMACR	0.0414
CUEDC2	hsa-mir-186	RP11-793H13.8	0.0414
FASN	hsa-mir-17	LOC100506472	0.0414
LARP1	hsa-let-7a-1	AC135048.13	0.0414
ATG14	hsa-mir-671	SNHG3	0.0417
HBP1	hsa-let-7a-3	SNHG16	0.0417
ZNF208	hsa-mir-197	CTC-559E9.4	0.0418
TROVE2	hsa-let-7b	CTB-89H12.4	0.0419
UBE2Z	hsa-mir-92a-1	HCP5	0.042
BZW1	hsa-mir-197	SNHG1	0.0421
MKNK2	hsa-mir-92a-1	CTD-2587H24.14	0.0421
MKNK2	hsa-mir-17	CTD-2587H24.14	0.0421
MYO1F	hsa-mir-17	LOC100506472	0.0421
PKM	hsa-let-7a-1	AC135048.13	0.0421
ZNF267	hsa-mir-25	RP11-618G20.1	0.0421
MAT2B	hsa-mir-106b	CTB-89H12.4	0.0423
ISCA1	hsa-mir-197	CTC-559E9.4	0.0424
SRP68	hsa-mir-221	RP11-108M9.3	0.0426
TXK	hsa-mir-23a	MGC27345	0.0426
DEDD2	hsa-mir-92a-1	HCP5	0.0427
ZNF770	hsa-mir-106b	MALAT1	0.0427
GYS1	hsa-mir-326	RP4-622L5.2	0.0432
PLD3	hsa-let-7d	FLJ23867	0.0432
TNPO1	hsa-mir-23a	NPHP3-ACAD11	0.0432
C17orf80	hsa-mir-125a	RP11-158I13.2	0.0433
RLIM	hsa-mir-106b	DYX1C1-CCPG1	0.0434
RIF1	hsa-mir-223	GAS5	0.0435
VAT1	hsa-mir-2110	MIRLET7BHG	0.0435
ASCC1	hsa-mir-195	CTBP1-AS1	0.0436
CBR1	hsa-mir-186	RP11-793H13.8	0.0439
DPP8	hsa-mir-197	CTC-559E9.4	0.0441
ANP32E	hsa-let-7b	CTB-89H12.4	0.0442
AGO1	hsa-let-7d	FLJ23867	0.0444
TMEM127	hsa-mir-17	LOC100506472	0.0444
COPS2	hsa-let-7b	SNHG1	0.0446
EIF4G2	hsa-let-7a-1	AC135048.13	0.0446
IFNAR1	hsa-mir-106b	MALAT1	0.0446
TBC1D9B	hsa-let-7d	FLJ23867	0.0446
ZNF644	hsa-let-7f-2	SNHG1	0.0447
PLD3	hsa-let-7d	AC135048.13	0.0448
NOLC1	hsa-let-7a-1	HCP5	0.045
PCMTD1	hsa-let-7f-2	TUG1	0.045
TIMM50	hsa-mir-186	TMX2-CTNND1	0.0451
HNRNPU	hsa-mir-30e	SNHG5	0.0453
ZC3H11A	hsa-let-7b	SNHG1	0.0457
SYF2	hsa-let-7a-3	CTB-89H12.4	0.0458
TBC1D9B	hsa-let-7d	AC135048.13	0.0458
PARP16	hsa-let-7a-1	AP001372.2	0.0459
COX2	hsa-let-7a-3	GAS5	0.046
FBXL18	hsa-mir-125a	RAD51L3-RFFL	0.0462
SHISA5	hsa-mir-92a-1	CTD-2587H24.14	0.0462
RAB40C	hsa-let-7a-1	AC135048.13	0.0464
RPL9	hsa-let-7a-3	MALAT1	0.0464
SUPT16H	hsa-mir-30e	SNHG5	0.0464
ZNF644	hsa-let-7f-2	RP11-227G15.3	0.0464
BACH2	hsa-mir-204	SPECC1L-ADORA2A	0.0465
SP100	hsa-let-7b	GAS5	0.0467
ZNF264	hsa-mir-30c-2	SNHG14	0.0467
E4F1	hsa-mir-92a-1	CTD-2587H24.14	0.0471
HNRNPU	hsa-let-7a-3	MALAT1	0.0471
TRIM23	hsa-mir-30e	SNHG5	0.0472
ZFP36L2	hsa-mir-186	RP11-793H13.8	0.0473
ACBD5	hsa-mir-223	GAS5	0.0479
FBXL3	hsa-mir-221	GAS5	0.048
LYRM7	hsa-mir-23a	NPHP3-ACAD11	0.048
MINK1	hsa-mir-186	CTD-2587H24.14	0.048
TRRAP	hsa-let-7a-1	AP001372.2	0.0481
KLHL15	hsa-mir-15a	NCBP2-AS2	0.0482
MAP2K7	hsa-let-7f-1	RP11-44M6.7	0.0482
MAP7D1	hsa-mir-186	CTD-2587H24.14	0.0482
TMCO3	hsa-mir-30c-2	HNRNPUL2-BSCL2	0.0482
TRAF7	hsa-let-7a-1	AC135048.13	0.0482
UBA1	hsa-mir-17	CTD-2587H24.14	0.0482
CARM1	hsa-mir-92a-1	RP11-400F19.8	0.0485
ZNF585A	hsa-let-7a-1	RP11-158H5.7	0.0487
SLC1A5	hsa-mir-186	CTD-2587H24.14	0.0488
ATG2A	hsa-mir-17	CTD-2587H24.14	0.0489
NARS2	hsa-let-7b	MALAT1	0.049
NKIRAS2	hsa-mir-2110	RP11-44M6.7	0.049
RNMT	hsa-let-7b	CTB-89H12.4	0.049
SLC1A5	hsa-mir-17	CTD-2587H24.14	0.049
SLC25A24	hsa-let-7b	MALAT1	0.049
TSC22D4	hsa-mir-186	CTD-2587H24.14	0.049
FAM160B2	hsa-mir-92a-1	CTD-2587H24.14	0.0491
BRWD1	hsa-mir-221	RP11-227G15.3	0.0493
TRAT1	hsa-mir-197	CTC-559E9.4	0.0493
HNRNPU	hsa-let-7a-3	GAS5	0.0495
MIB1	hsa-let-7a-3	SNHG16	0.0495
RHOC	hsa-mir-2110	RP11-197N18.2	0.0495
NOP58	hsa-mir-221	GAS5	0.0496
TNRC18	hsa-mir-92a-1	CTD-2587H24.14	0.0496
BAG6	hsa-mir-92a-1	RP11-400F19.8	0.0497
RBM34	hsa-let-7b	GAS5	0.0497
TRAT1	hsa-mir-221	RP11-227G15.3	0.0497
AK2	hsa-mir-125a	RP11-158I13.2	0.0498
SLC4A7	hsa-mir-30e	SNHG5	0.0499

## Sheet: Stage3
The identified 641 dysregulated LmiRM-CTs in stage 3 of MI (1 month after MI) using our method
mRNA	miRNA	lncRNA	p-value
GTPBP2	hsa-mir-2110	RP11-44M6.7	0.0001
TOR2A	hsa-mir-2110	MIRLET7BHG	0.0001
SKI	hsa-mir-2110	RTEL1-TNFRSF6B	0.0003
DNTTIP2	hsa-mir-25	RP11-618G20.1	0.0005
NFIC	hsa-mir-2110	RTEL1-TNFRSF6B	0.0005
SKI	hsa-mir-2110	RP11-44M6.7	0.0006
CARD10	hsa-mir-103a-2	SMCR5	0.0007
LSM6	hsa-let-7b	GAS5	0.0007
CARD10	hsa-mir-103a-2	HOXA10-HOXA9	0.0008
NFIC	hsa-mir-2110	RP11-44M6.7	0.0008
APPL1	hsa-let-7b	GAS5	0.001
LSAMP	hsa-mir-103a-2	SMCR5	0.0011
TET3	hsa-mir-2110	RP11-44M6.7	0.0011
BTBD9	hsa-let-7b	GAS5	0.0012
MTAP	hsa-mir-23b	NPHP3-ACAD11	0.0012
USP47	hsa-let-7b	GAS5	0.0013
XPNPEP3	hsa-mir-181c	CDKN2B-AS1	0.0013
MOB1A	hsa-let-7b	GAS5	0.0014
WDR33	hsa-let-7b	GAS5	0.0015
AHCTF1	hsa-let-7b	GAS5	0.0016
KPNA5	hsa-let-7b	GAS5	0.0019
CHD1	hsa-let-7b	GAS5	0.002
CARD10	hsa-mir-103a-2	AC004383.4	0.0023
ASCC3	hsa-let-7b	GAS5	0.0024
ATE1	hsa-let-7b	GAS5	0.0024
USP47	hsa-let-7a-3	CTB-89H12.4	0.0024
PPIL4	hsa-let-7b	GAS5	0.0025
SFT2D3	hsa-let-7a-3	CTB-89H12.4	0.0025
COPS2	hsa-let-7b	GAS5	0.0026
NAA35	hsa-let-7a-3	MALAT1	0.0026
TMED5	hsa-let-7a-3	MALAT1	0.0026
HNRNPDL	hsa-let-7a-3	MALAT1	0.0027
NAA35	hsa-let-7a-3	CTB-89H12.4	0.0027
CCNT2	hsa-let-7a-3	MALAT1	0.0028
HBP1	hsa-let-7b	GAS5	0.0028
IPO8	hsa-let-7b	GAS5	0.0029
KIAA0391	hsa-let-7a-3	CTB-89H12.4	0.0029
TMED5	hsa-let-7a-3	CTB-89H12.4	0.0029
TRIP12	hsa-let-7b	GAS5	0.0029
ZNF644	hsa-let-7b	GAS5	0.0029
NIPBL	hsa-let-7b	GAS5	0.0031
SHOC2	hsa-let-7a-3	MALAT1	0.0031
CDV3	hsa-let-7a-3	MALAT1	0.0032
COX1	hsa-let-7a-3	MALAT1	0.0032
CDV3	hsa-let-7a-3	CTB-89H12.4	0.0033
ELMOD2	hsa-let-7b	GAS5	0.0033
G2E3	hsa-let-7a-3	CTB-89H12.4	0.0034
CEP135	hsa-let-7b	GAS5	0.0036
KDM1A	hsa-mir-23b	NPHP3-ACAD11	0.0036
POLR3A	hsa-mir-125a	RP11-158I13.2	0.0036
TROVE2	hsa-let-7b	GAS5	0.0036
AMD1	hsa-let-7a-3	MALAT1	0.0037
KRAS	hsa-let-7a-3	MALAT1	0.0037
ZCCHC8	hsa-mir-125a	RP11-158I13.2	0.0037
AMD1	hsa-let-7a-3	CTB-89H12.4	0.0039
KRAS	hsa-let-7a-3	CTB-89H12.4	0.0039
HBP1	hsa-let-7a-3	CTB-89H12.4	0.0041
RNMT	hsa-let-7b	GAS5	0.0041
MOB1A	hsa-mir-564	MALAT1	0.0042
NIPBL	hsa-let-7a-3	CTB-89H12.4	0.0042
NIPBL	hsa-let-7a-3	MALAT1	0.0042
SUZ12	hsa-mir-138-1	RP11-158I13.2	0.005
ERGIC2	hsa-let-7b	GAS5	0.0051
STX7	hsa-mir-4793	SNHG5	0.0052
ITPR2	hsa-mir-4793	SNHG5	0.0054
AGO2	hsa-mir-132	AC012307.3	0.0056
RRP15	hsa-mir-4793	SNHG5	0.0056
ACAP2	hsa-mir-4793	SNHG5	0.0057
AMMECR1L	hsa-mir-191	ZFP91-CNTF	0.0057
ANP32E	hsa-let-7b	GAS5	0.0059
HLX	hsa-mir-2110	ADAMTSL4-AS1	0.0062
TET3	hsa-mir-2110	ADAMTSL4-AS1	0.0062
FKBP8	hsa-mir-2110	RP11-44M6.7	0.0066
OXR1	hsa-let-7b	CTB-89H12.4	0.0066
TPP2	hsa-let-7b	GAS5	0.0066
OXR1	hsa-mir-106b	CTB-89H12.4	0.0067
LSM6	hsa-let-7b	CTB-89H12.4	0.0068
RIF1	hsa-mir-223	GAS5	0.0068
ZNF738	hsa-let-7b	GAS5	0.0068
COX2	hsa-let-7a-3	MALAT1	0.0069
HIF1A	hsa-let-7b	GAS5	0.0069
PDE12	hsa-let-7b	GAS5	0.0069
SHOC2	hsa-let-7a-3	CTB-89H12.4	0.0071
TAF9	hsa-let-7b	GAS5	0.0075
PLEKHA3	hsa-let-7b	GAS5	0.0077
USP47	hsa-let-7b	CTB-89H12.4	0.0078
MOB1A	hsa-let-7b	CTB-89H12.4	0.0079
AHCTF1	hsa-let-7b	CTB-89H12.4	0.008
OSTM1	hsa-let-7b	CTB-89H12.4	0.008
PPIL3	hsa-let-7b	GAS5	0.008
SETD5	hsa-mir-132	AC012307.3	0.008
GABPB1	hsa-let-7b	GAS5	0.0081
SYF2	hsa-let-7b	GAS5	0.0081
SH3GLB1	hsa-mir-106b	CTB-89H12.4	0.0082
PRIM2	hsa-let-7b	CTB-89H12.4	0.0085
BTLA	hsa-mir-23a	NPHP3-ACAD11	0.0088
COX2	hsa-let-7a-3	CTB-89H12.4	0.0088
SPCS3	hsa-let-7b	CTB-89H12.4	0.0088
ZMYM2	hsa-let-7b	GAS5	0.0088
CHURC1	hsa-mir-106b	CTB-89H12.4	0.0089
GABPB1	hsa-let-7b	CTB-89H12.4	0.0089
GABPB1	hsa-mir-106b	CTB-89H12.4	0.0089
GOLT1B	hsa-mir-106b	CTB-89H12.4	0.0089
MIDN	hsa-mir-2110	RP11-44M6.7	0.0089
NAA20	hsa-let-7a-3	CTB-89H12.4	0.0089
PSMA3	hsa-mir-106b	CTB-89H12.4	0.0089
SMU1	hsa-mir-4793	SNHG5	0.0089
SRCAP	hsa-mir-2110	RTEL1-TNFRSF6B	0.0089
TBL1XR1	hsa-mir-106b	CTB-89H12.4	0.0089
ZBTB24	hsa-mir-23a	NPHP3-ACAD11	0.0089
ASCC3	hsa-let-7b	CTB-89H12.4	0.009
C17orf80	hsa-mir-125a	RP11-158I13.2	0.009
KIAA1143	hsa-let-7a-3	CTB-89H12.4	0.0091
USP16	hsa-mir-106b	CTB-89H12.4	0.0091
COX2	hsa-let-7b	GAS5	0.0093
CCDC186	hsa-let-7b	GAS5	0.0094
DNM1L	hsa-mir-106b	CTB-89H12.4	0.0094
TNPO1	hsa-let-7b	CTB-89H12.4	0.0094
ACTL6A	hsa-mir-25	MALAT1	0.0097
COPS2	hsa-let-7b	CTB-89H12.4	0.0097
LRRC40	hsa-let-7b	CTB-89H12.4	0.0097
MAP3K14	hsa-mir-34a	EMC3-AS1	0.0097
PPME1	hsa-mir-34a	EMC3-AS1	0.0097
RAB3GAP2	hsa-let-7b	GAS5	0.0097
SUPT16H	hsa-let-7b	GAS5	0.0097
BRD4	hsa-mir-2110	RTEL1-TNFRSF6B	0.0098
DICER1	hsa-let-7a-3	CTB-89H12.4	0.0098
HBP1	hsa-let-7b	CTB-89H12.4	0.0098
PKM	hsa-let-7a-1	AC135048.13	0.0098
RPL9	hsa-mir-25	MALAT1	0.0099
TRIP12	hsa-let-7b	CTB-89H12.4	0.0099
ZNF644	hsa-let-7b	CTB-89H12.4	0.0099
IPO8	hsa-let-7b	CTB-89H12.4	0.01
HBP1	hsa-mir-106b	CTB-89H12.4	0.0102
TAX1BP1	hsa-mir-106b	CTB-89H12.4	0.0102
BIRC6	hsa-let-7b	GAS5	0.0103
NIPBL	hsa-let-7b	CTB-89H12.4	0.0106
RBM12B	hsa-let-7b	GAS5	0.0107
SRCAP	hsa-mir-2110	RP11-44M6.7	0.0108
UBE2Q2	hsa-mir-106b	CTB-89H12.4	0.0108
USP47	hsa-let-7a-3	MALAT1	0.0108
VAT1	hsa-mir-2110	RTEL1-TNFRSF6B	0.0108
LSM6	hsa-let-7b	SNHG1	0.0109
SKI	hsa-mir-2110	FLJ23867	0.011
TBC1D15	hsa-mir-25	MALAT1	0.011
VPS26A	hsa-mir-106b	CTB-89H12.4	0.011
ZBTB24	hsa-mir-23a	MGC27345	0.011
C3orf38	hsa-mir-106b	CTB-89H12.4	0.0111
BRD4	hsa-mir-2110	SENP3-EIF4A1	0.0114
CARD10	hsa-mir-103a-2	AFAP1-AS1	0.0114
CARM1	hsa-mir-92a-1	RP11-400F19.8	0.0114
CCDC186	hsa-let-7b	SNHG1	0.0114
KIAA1143	hsa-let-7b	CTB-89H12.4	0.0114
SP100	hsa-let-7b	CTB-89H12.4	0.0114
TROVE2	hsa-let-7b	CTB-89H12.4	0.0114
HIC2	hsa-mir-2110	MIRLET7BHG	0.0116
PTGES3	hsa-mir-106b	CTB-89H12.4	0.0116
RNMT	hsa-let-7b	CTB-89H12.4	0.0116
SKI	hsa-mir-2110	MIRLET7BHG	0.0119
ACTA1	hsa-let-7f-2	C14orf23	0.012
APPL1	hsa-mir-564	MALAT1	0.012
NCOR2	hsa-mir-2110	RTEL1-TNFRSF6B	0.012
CARD10	hsa-mir-103a-2	H19	0.0124
CCNT2	hsa-let-7b	GAS5	0.0124
CUL3	hsa-let-7b	GAS5	0.0124
HAUS6	hsa-let-7b	SNHG1	0.0124
HCFC1	hsa-mir-92a-1	RP11-400F19.8	0.0124
PDE12	hsa-let-7b	SNHG1	0.0124
TAB2	hsa-let-7b	GAS5	0.0124
TET3	hsa-mir-2110	FLJ23867	0.0124
USP15	hsa-let-7b	GAS5	0.0124
ZC3H11A	hsa-let-7b	SNHG1	0.0124
HNRNPU	hsa-let-7a-3	CTB-89H12.4	0.0127
PRIM2	hsa-let-7b	SNHG1	0.0127
PBX2	hsa-mir-92a-1	RP11-400F19.8	0.0128
AKT3	hsa-mir-223	GAS5	0.0129
ATP13A1	hsa-mir-92a-1	RP11-400F19.8	0.0129
BAG6	hsa-mir-92a-1	RP11-400F19.8	0.0129
EIF4G2	hsa-let-7a-1	AC135048.13	0.0129
GABPB1	hsa-let-7b	SNHG1	0.0129
NCOR2	hsa-mir-2110	RP11-44M6.7	0.0129
ORC4	hsa-let-7b	SNHG1	0.0129
PAXBP1	hsa-let-7a-3	CTB-89H12.4	0.0129
SHISA5	hsa-mir-92a-1	RP11-400F19.8	0.0129
SPCS3	hsa-let-7b	SNHG1	0.0129
DDX18	hsa-let-7b	SNHG1	0.0131
MMS22L	hsa-let-7b	SNHG1	0.0132
LSM6	hsa-let-7b	MALAT1	0.0134
ZNF490	hsa-mir-128-2	HCP5	0.0134
TNPO1	hsa-let-7b	SNHG1	0.014
KLC2	hsa-mir-92a-1	RP11-400F19.8	0.0142
MFSD11	hsa-mir-125a	CDKN2B-AS1	0.0143
PIP5K1C	hsa-mir-92a-1	RP11-400F19.8	0.0149
COPS2	hsa-let-7b	SNHG1	0.0151
LRRC40	hsa-let-7b	SNHG1	0.0151
CNOT2	hsa-let-7b	SNHG1	0.0152
SFXN1	hsa-mir-22	RP11-298P3.4	0.0153
APPL1	hsa-let-7b	MALAT1	0.0155
KIAA0895L	hsa-mir-2110	RTEL1-TNFRSF6B	0.0155
ZNF385A	hsa-mir-17	INO80B-WBP1	0.0155
ZNF385A	hsa-mir-20a	INO80B-WBP1	0.0155
ZNF644	hsa-let-7b	SNHG1	0.0155
CORO7	hsa-mir-92a-1	RP11-400F19.8	0.0156
CCNG1	hsa-let-7b	GAS5	0.0157
CRTC2	hsa-mir-92a-1	RP11-400F19.8	0.0157
ERGIC2	hsa-let-7b	CTB-89H12.4	0.0157
NAA15	hsa-let-7b	SNHG1	0.0157
ERGIC2	hsa-mir-106b	CTB-89H12.4	0.0158
STK4	hsa-let-7b	GAS5	0.0161
KDELR1	hsa-mir-17	INO80B-WBP1	0.0168
GOLGA4	hsa-let-7a-3	CTB-89H12.4	0.017
MGAT4A	hsa-mir-197	JPX	0.017
MOB1A	hsa-let-7b	MALAT1	0.017
TMEM127	hsa-mir-17	INO80B-WBP1	0.017
TMEM127	hsa-mir-20a	INO80B-WBP1	0.017
AHCTF1	hsa-let-7b	MALAT1	0.0172
KCNK6	hsa-mir-17	INO80B-WBP1	0.0172
KCNK6	hsa-mir-20a	INO80B-WBP1	0.0172
MTF1	hsa-mir-17	LOC100506472	0.0172
PLD3	hsa-let-7a-1	AC135048.13	0.0172
WDR33	hsa-let-7b	MALAT1	0.0172
ZNF385A	hsa-mir-17	LOC100506472	0.0172
LY6G5B	hsa-mir-92a-1	RP11-400F19.8	0.0173
PGM3	hsa-let-7b	SNHG1	0.0173
DOT1L	hsa-mir-92a-1	RP11-400F19.8	0.0174
KIAA0895L	hsa-mir-2110	RP11-44M6.7	0.0174
MTX3	hsa-let-7b	GAS5	0.0174
PRIM2	hsa-let-7b	GAS5	0.0174
RANBP6	hsa-let-7b	GAS5	0.0174
SP100	hsa-let-7b	SNHG1	0.0174
STK40	hsa-mir-20a	INO80B-WBP1	0.0174
IQSEC1	hsa-mir-92a-1	RP11-400F19.8	0.0175
KPNA5	hsa-let-7b	MALAT1	0.0175
WDR12	hsa-mir-125a	RP11-158I13.2	0.0175
CCNT2	hsa-let-7b	MALAT1	0.0177
GOSR2	hsa-mir-326	RP4-622L5.2	0.0177
BTLA	hsa-mir-23b	NPHP3-ACAD11	0.0179
RTCA	hsa-let-7b	SNHG1	0.0179
ARHGAP1	hsa-mir-20a	INO80B-WBP1	0.018
ARHGAP1	hsa-mir-17	INO80B-WBP1	0.018
PPID	hsa-let-7b	GAS5	0.018
CHD1	hsa-let-7b	MALAT1	0.0181
KDELR1	hsa-mir-17	LOC100506472	0.0181
CUEDC2	hsa-mir-186	RP11-793H13.8	0.0182
MTO1	hsa-mir-23a	AC000120.7	0.0182
NFKB1	hsa-mir-138-1	RP11-158I13.2	0.0182
TMEM127	hsa-mir-17	LOC100506472	0.0182
GYS1	hsa-mir-20a	INO80B-WBP1	0.0184
KCNK6	hsa-mir-17	LOC100506472	0.0184
MMS22L	hsa-let-7b	MALAT1	0.0184
NFKB1	hsa-mir-138-1	RP11-478C19.2	0.0184
RBM34	hsa-let-7b	SNHG1	0.0184
SLC25A44	hsa-mir-17	INO80B-WBP1	0.0184
SLC25A44	hsa-mir-20a	INO80B-WBP1	0.0184
SPIN1	hsa-mir-21	RP11-77H9.2	0.0184
SYNE2	hsa-let-7b	GAS5	0.0184
ASCC3	hsa-let-7b	MALAT1	0.0185
PIGS	hsa-mir-17	LOC100506472	0.0185
STRN3	hsa-mir-564	MALAT1	0.0185
ZNF417	hsa-let-7b	MALAT1	0.019
ARHGAP1	hsa-mir-17	LOC100506472	0.0192
ATXN2L	hsa-mir-92a-1	RP11-400F19.8	0.0192
TESK1	hsa-mir-92a-1	RP11-400F19.8	0.0192
ATG2A	hsa-mir-17	INO80B-WBP1	0.0193
ATG2A	hsa-mir-20a	INO80B-WBP1	0.0193
LRRC40	hsa-let-7b	MALAT1	0.0193
USO1	hsa-let-7b	MALAT1	0.0194
RPL9	hsa-let-7a-3	MALAT1	0.0197
RPS3A	hsa-let-7a-3	MALAT1	0.0197
SLC25A44	hsa-mir-17	LOC100506472	0.0197
TRIP12	hsa-let-7b	MALAT1	0.0197
ZNF644	hsa-let-7b	MALAT1	0.0197
LIMK1	hsa-mir-17	LOC100506472	0.0198
MIB1	hsa-let-7b	GAS5	0.0198
NIPBL	hsa-let-7b	MALAT1	0.0198
BTF3L4	hsa-mir-197	CTC-559E9.4	0.0199
NAA15	hsa-let-7b	MALAT1	0.02
CPTP	hsa-mir-92a-1	RP11-400F19.8	0.0201
DHX9	hsa-let-7b	GAS5	0.0201
FZD9	hsa-let-7f-2	H19	0.0201
GPATCH2L	hsa-mir-23a	AC000120.7	0.0201
CLPTM1	hsa-mir-17	INO80B-WBP1	0.0202
SFT2D3	hsa-let-7a-3	MALAT1	0.0202
NKIRAS2	hsa-let-7a-1	AC135048.13	0.0204
CDKN1B	hsa-let-7a-3	MALAT1	0.0205
FLNB	hsa-mir-9-1	SPECC1L-ADORA2A	0.0205
BNIP2	hsa-mir-106b	MALAT1	0.0207
HIC2	hsa-mir-2110	SENP3-EIF4A1	0.0207
MAP3K3	hsa-mir-132	AC012307.3	0.0207
TNFSF12	hsa-mir-17	LOC100506472	0.0207
TRIOBP	hsa-mir-20a	INO80B-WBP1	0.0207
TRIOBP	hsa-mir-17	INO80B-WBP1	0.0207
USP47	hsa-let-7a-3	GAS5	0.0207
ZNF805	hsa-let-7b	MALAT1	0.0207
EIF4A2	hsa-let-7b	GAS5	0.0208
HOOK3	hsa-mir-106b	MALAT1	0.0208
MIDN	hsa-mir-17	LOC100506472	0.0208
NACC1	hsa-mir-17	LOC100506472	0.0208
NCKIPSD	hsa-let-7a-1	AC135048.13	0.0208
TP53	hsa-mir-17	INO80B-WBP1	0.0208
TP53	hsa-mir-20a	INO80B-WBP1	0.0208
ZNF776	hsa-mir-125a	CDKN2B-AS1	0.0208
PIGO	hsa-mir-17	INO80B-WBP1	0.0209
PIGO	hsa-mir-20a	INO80B-WBP1	0.0209
MIB1	hsa-let-7a-3	GAS5	0.0216
MNT	hsa-mir-17	LOC100506472	0.0216
PPP2R1A	hsa-mir-17	INO80B-WBP1	0.0216
PPP2R1A	hsa-mir-20a	INO80B-WBP1	0.0216
COX2	hsa-let-7a-3	GAS5	0.0217
SCAMP2	hsa-mir-20a	INO80B-WBP1	0.0217
SCAMP2	hsa-mir-17	INO80B-WBP1	0.0217
SERINC1	hsa-mir-223	GAS5	0.0217
HNRNPDL	hsa-let-7b	GAS5	0.0218
AKAP17A	hsa-let-7a-1	AC135048.13	0.0219
RNMT	hsa-let-7b	MALAT1	0.0219
CLPTM1	hsa-mir-17	LOC100506472	0.0221
ELMSAN1	hsa-mir-20a	INO80B-WBP1	0.0221
ELMSAN1	hsa-mir-17	INO80B-WBP1	0.0221
AGO1	hsa-mir-320c-1	ZFP91-CNTF	0.0222
C11orf24	hsa-mir-92a-1	CTD-2587H24.14	0.0222
FAM49B	hsa-let-7b	GAS5	0.0222
HNRNPDL	hsa-let-7a-3	GAS5	0.0222
KIAA0930	hsa-let-7a-1	AC135048.13	0.0222
STK11IP	hsa-mir-17	LOC100506472	0.0222
TSC2	hsa-mir-17	INO80B-WBP1	0.0222
ZBTB7A	hsa-mir-17	INO80B-WBP1	0.0222
ZBTB7A	hsa-mir-20a	INO80B-WBP1	0.0222
ZSCAN29	hsa-mir-30c-2	RP11-158I13.2	0.0222
HAT1	hsa-let-7a-3	CTB-89H12.4	0.0224
ORAI1	hsa-mir-17	LOC100506472	0.0224
HSP90AA1	hsa-mir-185	SCARNA9	0.0229
MRPS25	hsa-mir-149	CTC-338M12.4	0.0229
SHOC2	hsa-let-7a-3	GAS5	0.0229
HBP1	hsa-let-7a-3	MALAT1	0.023
LY6G5B	hsa-mir-20a	INO80B-WBP1	0.023
LY6G5B	hsa-mir-17	INO80B-WBP1	0.023
MAVS	hsa-mir-20a	INO80B-WBP1	0.023
MAVS	hsa-mir-17	INO80B-WBP1	0.023
PIGS	hsa-mir-92a-1	CTD-2587H24.14	0.023
PIGS	hsa-mir-17	CTD-2587H24.14	0.023
TGFBR2	hsa-mir-9-1	RP11-77H9.2	0.023
TP53	hsa-mir-17	LOC100506472	0.023
RAVER1	hsa-let-7a-1	AC135048.13	0.0231
PIGO	hsa-mir-17	LOC100506472	0.0233
MKNK2	hsa-mir-17	LOC100506472	0.0234
PPP2R1A	hsa-mir-17	LOC100506472	0.0234
ATP2B1	hsa-let-7a-3	MALAT1	0.0236
IQSEC1	hsa-mir-17	INO80B-WBP1	0.0236
IQSEC1	hsa-mir-20a	INO80B-WBP1	0.0236
SCAMP2	hsa-mir-17	LOC100506472	0.0236
ATM	hsa-mir-223	GAS5	0.0237
ELMSAN1	hsa-mir-17	LOC100506472	0.0237
GDPD5	hsa-mir-92a-1	CTD-2587H24.14	0.0237
NKIRAS2	hsa-mir-2110	RP11-44M6.7	0.0237
PLXND1	hsa-let-7a-1	AC135048.13	0.0237
AMD1	hsa-let-7a-3	GAS5	0.0238
TSC2	hsa-mir-17	LOC100506472	0.0238
RRP1B	hsa-mir-150	STAG3L5P-PVRIG2P-PILRB	0.0239
CLCC1	hsa-mir-149	CTC-338M12.4	0.024
NFATC1	hsa-mir-204	SPECC1L-ADORA2A	0.024
ZBTB7A	hsa-mir-17	LOC100506472	0.0241
DSTYK	hsa-mir-23b	NPHP3-ACAD11	0.0242
HBP1	hsa-let-7a-3	GAS5	0.0242
LIMK1	hsa-mir-17	CTD-2587H24.14	0.0242
MIB1	hsa-let-7a-3	CTB-89H12.4	0.0242
TET3	hsa-mir-2110	MIRLET7BHG	0.0242
TET3	hsa-mir-2110	RP11-197N18.2	0.0242
MIDN	hsa-let-7a-1	AC135048.13	0.0244
MAVS	hsa-mir-17	LOC100506472	0.0245
FBXL18	hsa-mir-125a	RAD51L3-RFFL	0.0247
LY6G5B	hsa-mir-17	LOC100506472	0.0247
OXR1	hsa-mir-106b	DYX1C1-CCPG1	0.0247
NIPBL	hsa-let-7a-3	GAS5	0.0251
GRAMD1A	hsa-mir-20a	INO80B-WBP1	0.0252
GRAMD1A	hsa-mir-17	INO80B-WBP1	0.0252
RB1	hsa-mir-106b	DYX1C1-CCPG1	0.0254
FASN	hsa-mir-17	LOC100506472	0.0256
DCUN1D1	hsa-mir-106b	MALAT1	0.0257
IQSEC1	hsa-mir-17	LOC100506472	0.0257
YIPF6	hsa-mir-195	CTC-338M12.4	0.0257
BAG6	hsa-mir-92a-1	CTD-2587H24.14	0.0259
GOLGA4	hsa-let-7a-3	MALAT1	0.0259
HOOK3	hsa-mir-106b	DYX1C1-CCPG1	0.0259
KCTD21	hsa-let-7a-1	AC135048.13	0.0259
STIM1	hsa-mir-17	LOC100506472	0.0259
TNFSF12	hsa-mir-17	CTD-2587H24.14	0.0259
ATG2A	hsa-mir-17	CTD-2587H24.14	0.0262
GOLT1B	hsa-mir-106b	MALAT1	0.0262
TOR2A	hsa-mir-2110	SENP3-EIF4A1	0.0264
DENND4B	hsa-mir-92a-1	CTD-2587H24.14	0.0265
HNRNPUL1	hsa-let-7a-1	AC135048.13	0.0265
ZNF426	hsa-mir-138-1	RP11-158I13.2	0.0268
TBL1XR1	hsa-mir-106b	MALAT1	0.0269
NUCKS1	hsa-let-7b	GAS5	0.0274
SHOC2	hsa-let-7b	GAS5	0.0274
USP16	hsa-mir-106b	MALAT1	0.0274
CLPTM1	hsa-mir-17	CTD-2587H24.14	0.0275
GRAMD1A	hsa-mir-17	LOC100506472	0.0275
IFNAR1	hsa-mir-106b	DYX1C1-CCPG1	0.0275
KLC2	hsa-mir-92a-1	CTD-2587H24.14	0.0275
MIB1	hsa-let-7a-3	MALAT1	0.0275
ZNF644	hsa-let-7a-3	MALAT1	0.0275
ARL8B	hsa-let-7a-3	MALAT1	0.0276
DNM1L	hsa-mir-106b	MALAT1	0.0276
ARPP19	hsa-let-7b	GAS5	0.0277
MMS22L	hsa-let-7b	GAS5	0.0277
PPP1CC	hsa-mir-185	SCARNA9	0.0277
STK11IP	hsa-mir-17	CTD-2587H24.14	0.0277
SYF2	hsa-let-7b	SNHG16	0.0277
ZNF644	hsa-let-7a-3	CTB-89H12.4	0.0277
MLF2	hsa-mir-92a-1	CTD-2587H24.14	0.0279
ARL8B	hsa-let-7a-3	CTB-89H12.4	0.0281
EDC4	hsa-mir-92a-1	CTD-2587H24.14	0.0284
MAT2A	hsa-mir-21	HCP5	0.0284
UBN2	hsa-mir-150	STAG3L5P-PVRIG2P-PILRB	0.0284
ALDOA	hsa-mir-186	CTD-2587H24.14	0.0285
REXO1	hsa-mir-92a-1	CTD-2587H24.14	0.0285
TET3	hsa-mir-2110	SENP3-EIF4A1	0.0286
CNTRL	hsa-let-7a-3	MALAT1	0.0288
MKNK2	hsa-mir-17	CTD-2587H24.14	0.0288
MKNK2	hsa-mir-92a-1	CTD-2587H24.14	0.0288
ZNF770	hsa-mir-106b	MALAT1	0.0288
PFN1	hsa-mir-92a-1	CTD-2587H24.14	0.0289
SCAMP2	hsa-mir-17	CTD-2587H24.14	0.0289
SPOPL	hsa-mir-106b	DYX1C1-CCPG1	0.029
PCMTD1	hsa-mir-106b	MALAT1	0.0291
CYP26B1	hsa-mir-15a	NCBP2-AS2	0.0292
TPP1	hsa-mir-2110	RP11-44M6.7	0.0292
KPNA5	hsa-let-7b	SNHG16	0.0293
SLC4A2	hsa-mir-92a-1	CTD-2587H24.14	0.0293
SKI	hsa-mir-2110	SENP3-EIF4A1	0.0295
STAU1	hsa-mir-132	AC012307.3	0.0295
ZNF417	hsa-let-7b	GAS5	0.0295
TSC2	hsa-mir-17	CTD-2587H24.14	0.0296
ZNF609	hsa-let-7d	RP11-264B17.3	0.0296
ZNF689	hsa-mir-17	LOC100506472	0.0296
ZNF609	hsa-let-7d	XXbac-BPG300A18.13	0.0297
ZBTB7A	hsa-mir-17	CTD-2587H24.14	0.0298
CCNG1	hsa-let-7a-3	CTB-89H12.4	0.0299
ABR	hsa-mir-18a	CTD-2517M22.14	0.03
FBRS	hsa-mir-18a	CTD-2517M22.14	0.0302
MAVS	hsa-mir-17	CTD-2587H24.14	0.0302
MAVS	hsa-mir-92a-1	CTD-2587H24.14	0.0302
MMS22L	hsa-let-7b	SNHG16	0.0305
ATE1	hsa-let-7b	SNHG16	0.0307
FASN	hsa-mir-17	CTD-2587H24.14	0.0311
FASN	hsa-mir-92a-1	CTD-2587H24.14	0.0311
GOLGA1	hsa-mir-125a	RP11-158I13.2	0.0311
HMGB1	hsa-let-7b	GAS5	0.0311
NACC1	hsa-mir-18a	CTD-2517M22.14	0.0311
PRRC2A	hsa-mir-18a	CTD-2517M22.14	0.0313
STIM1	hsa-mir-17	CTD-2587H24.14	0.0313
ZNF644	hsa-let-7f-2	RP11-227G15.3	0.0313
IL6R	hsa-let-7a-1	AC135048.13	0.0315
LRRC40	hsa-let-7b	SNHG16	0.0315
RBM34	hsa-let-7b	GAS5	0.0315
SNX6	hsa-let-7a-3	CTB-89H12.4	0.0315
UTRN	hsa-let-7b	GAS5	0.0315
CHURC1	hsa-mir-106b	DYX1C1-CCPG1	0.0317
CIC	hsa-mir-18a	CTD-2517M22.14	0.0317
HBP1	hsa-let-7b	SNHG16	0.0317
G2E3	hsa-let-7a-3	MALAT1	0.032
SYNJ2BP	hsa-mir-150	STAG3L5P-PVRIG2P-PILRB	0.0321
DVL3	hsa-mir-17	LOC100506472	0.0322
HBS1L	hsa-mir-197	CTC-559E9.4	0.0322
RPL7A	hsa-mir-197	MALAT1	0.0322
AGO1	hsa-let-7a-1	AC135048.13	0.0324
NIPBL	hsa-let-7b	SNHG16	0.0324
CIZ1	hsa-let-7d	RP11-264B17.3	0.0325
GRAMD1A	hsa-mir-17	CTD-2587H24.14	0.0325
POLL	hsa-let-7a-1	AC135048.13	0.0325
ACAP2	hsa-mir-4793	MALAT1	0.0326
SF3A1	hsa-let-7a-1	AC135048.13	0.0329
TP53	hsa-mir-18a	CTD-2517M22.14	0.0329
ATXN2L	hsa-mir-92a-1	CTD-2587H24.14	0.033
PBX2	hsa-let-7a-1	AC135048.13	0.0332
IPPK	hsa-mir-125a	RP11-158I13.2	0.0334
KIFAP3	hsa-mir-671	SNHG8	0.0334
LBR	hsa-let-7b	GAS5	0.0334
SCAMP2	hsa-mir-18a	CTD-2517M22.14	0.0334
TAPBP	hsa-mir-18a	CTD-2517M22.14	0.0334
ZNF770	hsa-mir-106b	DYX1C1-CCPG1	0.0334
HSPA8	hsa-let-7b	GAS5	0.0335
TNRC6B	hsa-mir-26a-1	SPECC1L-ADORA2A	0.0335
ZNF644	hsa-let-7f-2	SNHG1	0.0337
ZNF682	hsa-mir-150	STAG3L5P-PVRIG2P-PILRB	0.0337
DEDD2	hsa-mir-92a-1	CTD-2587H24.14	0.0338
MAP2K7	hsa-let-7d	RP11-264B17.3	0.034
USP37	hsa-mir-185	SCARNA9	0.034
SLC35A4	hsa-let-7a-1	AC135048.13	0.0341
GGA3	hsa-let-7a-1	AC135048.13	0.0346
SETD5	hsa-mir-194-2	RP11-77H9.2	0.0346
IRF2BP2	hsa-let-7a-1	AC135048.13	0.0347
ZC3H18	hsa-let-7a-1	AC135048.13	0.0347
ZNF644	hsa-let-7f-2	MALAT1	0.0347
ATXN2	hsa-let-7d	RP11-264B17.3	0.0348
RPL7A	hsa-mir-197	SNHG1	0.0349
ATXN2	hsa-let-7d	XXbac-BPG300A18.13	0.0351
MTAP	hsa-mir-125a	CDKN2B-AS1	0.0351
DHX33	hsa-mir-125a	RP11-158I13.2	0.0354
MON1B	hsa-mir-18a	CTD-2517M22.14	0.0356
RNF187	hsa-mir-18a	CTD-2517M22.14	0.0356
FAM160B2	hsa-mir-92a-1	CTD-2587H24.14	0.0358
ISY1	hsa-mir-671	MALAT1	0.0359
HBP1	hsa-let-7a-3	SNHG16	0.0361
C19orf47	hsa-let-7a-1	AC135048.13	0.0365
PLAGL2	hsa-let-7a-1	AC135048.13	0.0365
SH3GLB1	hsa-let-7b	GAS5	0.0365
NIPBL	hsa-let-7a-3	SNHG16	0.0366
ALDH5A1	hsa-mir-23b	NPHP3-ACAD11	0.0368
ATXN2L	hsa-mir-18a	CTD-2517M22.14	0.0368
GRIK3	hsa-let-7f-2	C14orf23	0.0368
RNF44	hsa-let-7a-1	AC135048.13	0.0368
SP100	hsa-let-7b	GAS5	0.0368
XIAP	hsa-mir-564	MALAT1	0.0368
ECSIT	hsa-mir-186	CTD-2587H24.14	0.0375
FIZ1	hsa-mir-186	CTD-2587H24.14	0.0375
KIAA1143	hsa-let-7b	GAS5	0.0375
PCIF1	hsa-let-7a-1	AC135048.13	0.0375
LARP1	hsa-let-7a-1	AC135048.13	0.0376
RHBDF2	hsa-let-7a-1	AC135048.13	0.0376
RLIM	hsa-mir-25	RP11-618G20.1	0.0376
SUGT1	hsa-mir-4793	MALAT1	0.0376
GOLGA4	hsa-let-7b	GAS5	0.0378
KMT2D	hsa-let-7a-1	AC135048.13	0.0387
TBC1D15	hsa-let-7b	GAS5	0.0387
PAXBP1	hsa-let-7a-3	MALAT1	0.0393
ATXN2L	hsa-let-7a-1	AC135048.13	0.0398
BRPF3	hsa-let-7a-1	AC135048.13	0.04
USP35	hsa-let-7a-1	AC135048.13	0.04
CEP170B	hsa-let-7f-2	C14orf23	0.0402
TP53	hsa-mir-2110	RP11-44M6.7	0.0402
CDC34	hsa-let-7a-1	AC135048.13	0.0405
KLHL15	hsa-mir-15a	NCBP2-AS2	0.0405
MAP2K7	hsa-let-7d	CTC-479C5.10	0.0408
PPIL3	hsa-let-7a-3	CTB-89H12.4	0.0408
SLC39A13	hsa-mir-18a	CTD-2517M22.14	0.0408
EWSR1	hsa-let-7a-3	MALAT1	0.0411
SLC5A6	hsa-let-7a-1	AC135048.13	0.0415
ALDH5A1	hsa-mir-23a	NPHP3-ACAD11	0.0421
IFNAR1	hsa-mir-106b	CTB-89H12.4	0.0422
POLL	hsa-mir-34a	EMC3-AS1	0.0422
ANP32E	hsa-let-7b	CTB-89H12.4	0.0424
HOOK3	hsa-mir-106b	CTB-89H12.4	0.0424
SYF2	hsa-let-7b	CTB-89H12.4	0.0425
BCL7B	hsa-mir-320c-1	RAD51L3-RFFL	0.0426
SGTB	hsa-mir-106b	CTB-89H12.4	0.0426
VAT1	hsa-mir-2110	MIRLET7BHG	0.0426
ZFYVE16	hsa-mir-106b	CTB-89H12.4	0.0426
CCNG1	hsa-mir-4793	SNHG5	0.0427
HNRNPA3	hsa-mir-4793	SNHG5	0.0428
MIDN	hsa-mir-2110	ADAMTSL4-AS1	0.0429
ZNF770	hsa-mir-106b	CTB-89H12.4	0.043
VPS13C	hsa-mir-106b	CTB-89H12.4	0.0431
SRCAP	hsa-mir-2110	ADAMTSL4-AS1	0.0434
PPIL3	hsa-let-7b	CTB-89H12.4	0.0435
APPL1	hsa-let-7b	CTB-89H12.4	0.0436
HNRNPK	hsa-mir-106b	CTB-89H12.4	0.0437
MTAP	hsa-mir-23a	NPHP3-ACAD11	0.0437
SH2B3	hsa-mir-92a-1	RP11-400F19.8	0.0437
TRIP12	hsa-mir-106b	CTB-89H12.4	0.0437
FKBP8	hsa-mir-2110	SENP3-EIF4A1	0.0438
HMGB1	hsa-mir-4793	SNHG5	0.0438
MAP3K2	hsa-mir-106b	CTB-89H12.4	0.0438
XRCC1	hsa-mir-34a	EMC3-AS1	0.0438
FOPNL	hsa-mir-4793	SNHG5	0.0439
RBCK1	hsa-mir-34a	EMC3-AS1	0.0439
TPP2	hsa-let-7b	SNHG1	0.0439
VAT1	hsa-mir-2110	RP11-197N18.2	0.0439
YTHDC1	hsa-let-7b	SNHG1	0.0439
BIRC6	hsa-let-7b	CTB-89H12.4	0.0443
PWP2	hsa-mir-181b-1	AP000320.7	0.0443
GID8	hsa-mir-132	AC012307.3	0.0445
NCOR2	hsa-mir-2110	SENP3-EIF4A1	0.0445
SFT2D3	hsa-let-7b	CTB-89H12.4	0.0445
USP3	hsa-mir-106b	CTB-89H12.4	0.0445
BNIP2	hsa-mir-106b	CTB-89H12.4	0.0446
NOLC1	hsa-let-7a-1	RP11-498P14.3	0.0446
PIGS	hsa-mir-92a-1	RP11-400F19.8	0.0446
SRCAP	hsa-mir-2110	SENP3-EIF4A1	0.0446
ELF4	hsa-mir-92a-1	RP11-400F19.8	0.0448
FAM210A	hsa-mir-106b	CTB-89H12.4	0.0448
MBNL1	hsa-let-7b	GAS5	0.0448
TUBB	hsa-mir-320c-1	RAD51L3-RFFL	0.0448
CSDE1	hsa-mir-106b	CTB-89H12.4	0.0449
HNRNPUL1	hsa-mir-92a-1	RP11-400F19.8	0.045
MAPK6	hsa-mir-128-2	HCP5	0.045
PLXNB2	hsa-mir-186	RP11-793H13.8	0.045
SLC6A16	hsa-mir-34a	EMC3-AS1	0.045
PBX2	hsa-let-7f-1	XXbac-BPG300A18.13	0.0452
GANAB	hsa-mir-92a-1	RP11-400F19.8	0.0453
CHD1	hsa-let-7b	CTB-89H12.4	0.0455
CUL3	hsa-let-7b	CTB-89H12.4	0.0455
ECHDC1	hsa-let-7a-3	CTB-89H12.4	0.0455
ACAP2	hsa-mir-106b	CTB-89H12.4	0.0457
EDC4	hsa-mir-92a-1	RP11-400F19.8	0.0457
SPOPL	hsa-mir-106b	CTB-89H12.4	0.0457
TOR1AIP2	hsa-let-7b	CTB-89H12.4	0.0457
USP15	hsa-let-7b	CTB-89H12.4	0.0458
TPP2	hsa-let-7b	MALAT1	0.046
NFATC2IP	hsa-mir-92a-1	RP11-400F19.8	0.0461
RNF123	hsa-mir-92a-1	RP11-400F19.8	0.0461
SERINC1	hsa-mir-106b	CTB-89H12.4	0.0461
YTHDC1	hsa-let-7b	MALAT1	0.0461
AGO1	hsa-mir-320c-1	RAD51L3-RFFL	0.0463
FKBP8	hsa-mir-2110	MIRLET7BHG	0.0463
MAT2B	hsa-mir-106b	CTB-89H12.4	0.0463
GOLGA4	hsa-let-7b	CTB-89H12.4	0.0467
MIDN	hsa-mir-2110	FLJ23867	0.0467
CEP135	hsa-let-7b	SNHG1	0.0468
HDAC10	hsa-mir-17	INO80B-WBP1	0.0472
PLAGL2	hsa-mir-132	AC012307.3	0.0475
PTAR1	hsa-mir-21	RP11-77H9.2	0.0475
MAP2K3	hsa-mir-20a	INO80B-WBP1	0.0477
ARPP19	hsa-let-7b	SNHG1	0.0478
EFCAB14	hsa-mir-9-1	RP11-77H9.2	0.0478
CCNG1	hsa-let-7b	CTB-89H12.4	0.0482
HIC2	hsa-mir-2110	ADAMTSL4-AS1	0.0482
HNRNPU	hsa-let-7b	CTB-89H12.4	0.0482
KPNA1	hsa-mir-194-2	TP73-AS1	0.0482
SFT2D3	hsa-let-7b	SNHG1	0.0482
SYF2	hsa-let-7a-3	CTB-89H12.4	0.0482
USO1	hsa-let-7b	CTB-89H12.4	0.0482
STK4	hsa-let-7b	CTB-89H12.4	0.0483
POU2F2	hsa-mir-92a-1	RP11-400F19.8	0.0485
MTF1	hsa-mir-17	INO80B-WBP1	0.0487
MTF1	hsa-mir-20a	INO80B-WBP1	0.0487
PLEKHA3	hsa-let-7b	MALAT1	0.0487
TRAT1	hsa-mir-197	JPX	0.0487
FAM91A1	hsa-mir-106b	CTB-89H12.4	0.0488
HDAC10	hsa-mir-17	LOC100506472	0.0488
SEC22A	hsa-mir-23a	NPHP3-ACAD11	0.0492
RASA2	hsa-mir-182	TUG1	0.0493
ST13	hsa-let-7b	GAS5	0.0493
MFSD11	hsa-mir-125a	RP11-158I13.2	0.0494
ZMYM2	hsa-let-7b	CTB-89H12.4	0.0494
GANAB	hsa-mir-17	INO80B-WBP1	0.0495
TNFSF12	hsa-mir-17	INO80B-WBP1	0.0495
CARM1	hsa-mir-92a-1	CTD-2587H24.14	0.0496
IFIT5	hsa-mir-106b	CTB-89H12.4	0.0498
RANBP6	hsa-let-7b	CTB-89H12.4	0.0498

## Sheet: Stage4
The identified 749 dysregulated LmiRM-CTs in stage 4 of MI (6 months after MI) using our method
mRNA	miRNA	lncRNA	p-value
POLR3A	hsa-mir-125a	RP11-158I13.2	0.0006
RLIM	hsa-mir-25	MALAT1	0.0006
ZCCHC8	hsa-mir-125a	RP11-158I13.2	0.0007
ZNF267	hsa-mir-25	MALAT1	0.0009
CARD10	hsa-mir-103a-2	AC004383.4	0.0015
AKT3	hsa-mir-223	GAS5	0.0016
DNTTIP2	hsa-mir-25	RP11-618G20.1	0.0016
PYROXD1	hsa-mir-30e	SNHG16	0.0016
G2E3	hsa-let-7a-3	CTB-89H12.4	0.0022
NDUFS2	hsa-let-7a-3	CTB-89H12.4	0.0022
RPS3	hsa-mir-30e	SNHG16	0.0023
PSMA2	hsa-let-7a-3	CTB-89H12.4	0.0025
KDM1A	hsa-mir-23b	NPHP3-ACAD11	0.0027
DHX33	hsa-mir-125a	RP11-158I13.2	0.0028
NIPBL	hsa-let-7a-3	CTB-89H12.4	0.0028
AMD1	hsa-let-7a-3	CTB-89H12.4	0.0029
SEPT7	hsa-mir-223	GAS5	0.003
PBX2	hsa-mir-92a-1	CTD-2587H24.14	0.0031
TMUB1	hsa-mir-92a-1	CTD-2587H24.14	0.0031
C11orf24	hsa-mir-92a-1	CTD-2587H24.14	0.0033
GTF3C2	hsa-mir-92a-1	CTD-2587H24.14	0.0033
KIAA1143	hsa-let-7a-3	CTB-89H12.4	0.0033
PPP1R12C	hsa-mir-92a-1	CTD-2587H24.14	0.0033
TNRC18	hsa-mir-92a-1	CTD-2587H24.14	0.0033
CCNG1	hsa-let-7a-3	CTB-89H12.4	0.0034
SLC4A2	hsa-mir-92a-1	CTD-2587H24.14	0.0034
PAIP1	hsa-mir-25	MALAT1	0.0035
ZBTB7B	hsa-mir-18a	CTD-2517M22.14	0.0035
DPP9	hsa-mir-17	CTD-2587H24.14	0.0036
PAXBP1	hsa-let-7a-3	CTB-89H12.4	0.0036
TAOK2	hsa-mir-92a-1	CTD-2587H24.14	0.0036
KIAA0895L	hsa-mir-2110	RTEL1-TNFRSF6B	0.0038
MKNK2	hsa-mir-17	CTD-2587H24.14	0.0038
MKNK2	hsa-mir-92a-1	CTD-2587H24.14	0.0038
MYO1F	hsa-mir-17	CTD-2587H24.14	0.0038
RPS3A	hsa-let-7a-3	CTB-89H12.4	0.0038
FAM160B2	hsa-mir-92a-1	CTD-2587H24.14	0.0039
KDM6B	hsa-mir-92a-1	CTD-2587H24.14	0.004
KDM6B	hsa-mir-17	CTD-2587H24.14	0.004
UBXN4	hsa-mir-30e	SNHG16	0.0042
ATM	hsa-mir-223	GAS5	0.0043
C7orf43	hsa-mir-17	CTD-2587H24.14	0.0043
CARD10	hsa-mir-103a-2	H19	0.0043
REXO1	hsa-mir-92a-1	CTD-2587H24.14	0.0043
LIMK1	hsa-mir-17	CTD-2587H24.14	0.0045
SRCAP	hsa-mir-17	CTD-2587H24.14	0.0045
TMEM189-UBE2V1	hsa-mir-2110	RTEL1-TNFRSF6B	0.0046
TMEM189	hsa-mir-2110	RTEL1-TNFRSF6B	0.0046
UBE2V1	hsa-mir-2110	RTEL1-TNFRSF6B	0.0046
KIAA0391	hsa-let-7a-3	CTB-89H12.4	0.0048
LSAMP	hsa-mir-103a-2	SMCR5	0.0049
MED29	hsa-mir-92a-1	CTD-2587H24.14	0.0049
SCAMP2	hsa-mir-18a	CTD-2517M22.14	0.0049
GANAB	hsa-mir-17	CTD-2587H24.14	0.005
GANAB	hsa-mir-92a-1	CTD-2587H24.14	0.005
RIF1	hsa-mir-223	GAS5	0.005
RNF44	hsa-mir-92a-1	CTD-2587H24.14	0.005
RPL7A	hsa-mir-197	SNHG1	0.005
SCAMP2	hsa-mir-17	CTD-2587H24.14	0.0051
ATP13A1	hsa-mir-92a-1	CTD-2587H24.14	0.0052
BNIP2	hsa-mir-106b	CTB-89H12.4	0.0052
HDAC10	hsa-mir-17	CTD-2587H24.14	0.0052
UNK	hsa-mir-17	CTD-2587H24.14	0.0052
PFN1	hsa-mir-92a-1	CTD-2587H24.14	0.0053
SRCAP	hsa-mir-2110	ADAMTSL4-AS1	0.0053
APOBEC3F	hsa-mir-92a-1	CTD-2587H24.14	0.0054
CARD10	hsa-mir-103a-2	SMCR5	0.0054
FASN	hsa-mir-92a-1	CTD-2587H24.14	0.0054
FASN	hsa-mir-17	CTD-2587H24.14	0.0054
MARK2	hsa-mir-17	CTD-2587H24.14	0.0054
MARK2	hsa-mir-92a-1	CTD-2587H24.14	0.0054
FOXJ2	hsa-mir-17	CTD-2587H24.14	0.0056
HEXIM1	hsa-mir-223	GAS5	0.0056
NKIRAS2	hsa-mir-2110	RTEL1-TNFRSF6B	0.0056
ALDH3B1	hsa-mir-2110	SENP3-EIF4A1	0.006
AZIN1	hsa-mir-30e	SNHG16	0.006
CAPZB	hsa-mir-92a-1	CTD-2587H24.14	0.006
DEGS1	hsa-let-7a-3	CTB-89H12.4	0.006
ERGIC2	hsa-mir-106b	CTB-89H12.4	0.006
HLX	hsa-mir-2110	ADAMTSL4-AS1	0.006
KMT2D	hsa-mir-92a-1	CTD-2587H24.14	0.006
MAVS	hsa-mir-17	CTD-2587H24.14	0.006
MAVS	hsa-mir-92a-1	CTD-2587H24.14	0.006
PLAGL2	hsa-mir-17	CTD-2587H24.14	0.006
PPIL3	hsa-let-7a-3	CTB-89H12.4	0.006
RAVER1	hsa-mir-92a-1	CTD-2587H24.14	0.006
RFX1	hsa-mir-92a-1	CTD-2587H24.14	0.006
TOPORS	hsa-mir-106b	CTB-89H12.4	0.006
CNEP1R1	hsa-mir-25	MALAT1	0.0061
FAM210A	hsa-mir-106b	CTB-89H12.4	0.0061
USP47	hsa-let-7a-3	CTB-89H12.4	0.0061
SH2B3	hsa-mir-92a-1	CTD-2587H24.14	0.0062
TNFSF12	hsa-mir-17	CTD-2587H24.14	0.0062
RPS3	hsa-mir-30e	EPB41L4A-AS1	0.0065
SYF2	hsa-let-7a-3	CTB-89H12.4	0.0065
CLPTM1	hsa-mir-17	CTD-2587H24.14	0.0066
ZNF302	hsa-mir-197	SNHG1	0.0067
BCL9L	hsa-mir-92a-1	CTD-2587H24.14	0.0068
HIF1A	hsa-mir-106b	CTB-89H12.4	0.0068
R3HDM4	hsa-mir-92a-1	CTD-2587H24.14	0.0068
RPL9	hsa-let-7a-3	CTB-89H12.4	0.0068
DNTTIP2	hsa-mir-106b	CTB-89H12.4	0.0069
ALDH3B1	hsa-mir-2110	ADAMTSL4-AS1	0.007
ATXN2L	hsa-mir-18a	CTD-2517M22.14	0.007
ATXN2L	hsa-mir-92a-1	CTD-2587H24.14	0.007
CARD10	hsa-mir-103a-2	HOXA10-HOXA9	0.007
EIF4EBP2	hsa-mir-92a-1	CTD-2587H24.14	0.007
HBP1	hsa-let-7a-3	CTB-89H12.4	0.007
LRRC58	hsa-mir-197	SNHG1	0.007
MIB1	hsa-let-7a-3	CTB-89H12.4	0.007
MLLT1	hsa-mir-17	CTD-2587H24.14	0.007
GOLT1B	hsa-mir-106b	CTB-89H12.4	0.0071
LARP1	hsa-mir-17	CTD-2587H24.14	0.0071
LARP1	hsa-mir-92a-1	CTD-2587H24.14	0.0071
SRF	hsa-mir-18a	CTD-2517M22.14	0.0071
TESK1	hsa-mir-92a-1	CTD-2587H24.14	0.0071
TMEM161A	hsa-mir-92a-1	CTD-2587H24.14	0.0071
TMEM184B	hsa-mir-92a-1	CTD-2587H24.14	0.0071
ZBTB7A	hsa-mir-17	CTD-2587H24.14	0.0071
ECHDC1	hsa-let-7a-3	CTB-89H12.4	0.0072
ELF4	hsa-mir-92a-1	CTD-2587H24.14	0.0073
EIF4G2	hsa-let-7a-1	AC135048.13	0.0074
ABR	hsa-mir-18a	CTD-2517M22.14	0.0075
DENND4B	hsa-mir-92a-1	CTD-2587H24.14	0.0075
TBL1XR1	hsa-mir-106b	CTB-89H12.4	0.0075
TET3	hsa-mir-2110	ADAMTSL4-AS1	0.0075
TP53	hsa-mir-18a	CTD-2517M22.14	0.0075
TP53	hsa-mir-17	CTD-2587H24.14	0.0075
TP53	hsa-mir-92a-1	CTD-2587H24.14	0.0075
USP16	hsa-mir-106b	CTB-89H12.4	0.0075
DEGS1	hsa-mir-106b	CTB-89H12.4	0.0076
MRPS25	hsa-mir-149	CTC-338M12.4	0.0076
UBXN4	hsa-mir-30e	EPB41L4A-AS1	0.0077
RNF187	hsa-mir-18a	CTD-2517M22.14	0.0078
HBP1	hsa-mir-106b	CTB-89H12.4	0.008
AZIN1	hsa-mir-30e	EPB41L4A-AS1	0.0082
BZW1	hsa-mir-197	SNHG1	0.0082
CDV3	hsa-let-7a-3	CTB-89H12.4	0.0082
CLCC1	hsa-mir-149	CTC-338M12.4	0.0082
DNAJB9	hsa-mir-106b	CTB-89H12.4	0.0082
HNRNPA1	hsa-mir-197	SNHG1	0.0082
NCL	hsa-mir-197	SNHG1	0.0082
AK2	hsa-mir-149	CTC-338M12.4	0.0083
SET	hsa-mir-197	SNHG1	0.0086
ALDH5A1	hsa-mir-23b	NPHP3-ACAD11	0.0089
CDK12	hsa-mir-9-1	RP11-77H9.2	0.0089
FBRS	hsa-mir-18a	CTD-2517M22.14	0.0089
SLC25A44	hsa-mir-17	INO80B-WBP1	0.0089
SLC25A44	hsa-mir-20a	INO80B-WBP1	0.0089
SP2	hsa-mir-20a	INO80B-WBP1	0.0089
SP2	hsa-mir-17	INO80B-WBP1	0.0089
SLC25A36	hsa-mir-25	MALAT1	0.009
KPNA5	hsa-let-7b	GAS5	0.0091
ZNF236	hsa-mir-132	AC012307.3	0.0091
APPL1	hsa-let-7b	GAS5	0.0092
COX2	hsa-let-7a-3	CTB-89H12.4	0.0095
FOXRED2	hsa-mir-17	CTD-2587H24.14	0.0098
ELMSAN1	hsa-mir-20a	INO80B-WBP1	0.0099
ELMSAN1	hsa-mir-17	INO80B-WBP1	0.0099
FUK	hsa-mir-92a-1	CTD-2587H24.14	0.0099
SRCAP	hsa-mir-18a	CTD-2517M22.14	0.01
ZBTB20	hsa-mir-21	RP11-77H9.2	0.01
CD2BP2	hsa-mir-92a-1	CTD-2587H24.14	0.0102
DAG1	hsa-mir-18a	CTD-2517M22.14	0.0102
SESN2	hsa-mir-20a	INO80B-WBP1	0.0102
SESN2	hsa-mir-17	INO80B-WBP1	0.0102
DPP9	hsa-mir-20a	INO80B-WBP1	0.0103
DPP9	hsa-mir-17	INO80B-WBP1	0.0103
IPPK	hsa-mir-125a	RP11-158I13.2	0.0103
MKNK2	hsa-mir-17	INO80B-WBP1	0.0103
MKNK2	hsa-mir-20a	INO80B-WBP1	0.0103
PPIL4	hsa-let-7b	GAS5	0.0103
KDM6B	hsa-mir-17	INO80B-WBP1	0.0105
KDM6B	hsa-mir-20a	INO80B-WBP1	0.0105
RNMT	hsa-let-7b	GAS5	0.0105
GOLGA4	hsa-let-7b	GAS5	0.0106
PLEKHA3	hsa-let-7b	GAS5	0.0106
ZNF426	hsa-mir-138-1	RP11-158I13.2	0.0106
CAPN15	hsa-mir-20a	INO80B-WBP1	0.0109
CAPN15	hsa-mir-17	INO80B-WBP1	0.0109
CARD10	hsa-mir-103a-2	AFAP1-AS1	0.0109
CHD1	hsa-let-7b	GAS5	0.0109
ERGIC2	hsa-let-7b	GAS5	0.0109
GRAMD1A	hsa-mir-17	CTD-2587H24.14	0.0109
TROVE2	hsa-let-7b	GAS5	0.0109
ZNF417	hsa-let-7b	GAS5	0.0109
ZNF644	hsa-let-7b	GAS5	0.0109
AHCTF1	hsa-let-7b	GAS5	0.011
AXIN1	hsa-mir-92a-1	CTD-2587H24.14	0.011
CEP135	hsa-let-7b	GAS5	0.011
KIAA1143	hsa-let-7b	GAS5	0.011
PDHB	hsa-mir-106b	CTB-89H12.4	0.011
PRIM2	hsa-let-7b	GAS5	0.011
TMED5	hsa-let-7a-3	CTB-89H12.4	0.011
FASN	hsa-mir-17	INO80B-WBP1	0.0111
FOXJ2	hsa-mir-20a	INO80B-WBP1	0.0111
FOXJ2	hsa-mir-17	INO80B-WBP1	0.0111
GABPB1	hsa-let-7b	GAS5	0.0111
GANAB	hsa-mir-17	INO80B-WBP1	0.0111
HDAC10	hsa-mir-17	INO80B-WBP1	0.0111
MAP3K14	hsa-mir-17	CTD-2587H24.14	0.0111
MARK2	hsa-mir-17	INO80B-WBP1	0.0111
PTGES3	hsa-mir-106b	CTB-89H12.4	0.0111
PYROXD1	hsa-mir-30e	SNHG5	0.0111
UNK	hsa-mir-20a	INO80B-WBP1	0.0111
UNK	hsa-mir-17	INO80B-WBP1	0.0111
WDR12	hsa-mir-125a	RP11-158I13.2	0.0111
WDR33	hsa-let-7b	GAS5	0.0111
ZNF738	hsa-let-7b	GAS5	0.0111
ALDH3B1	hsa-mir-2110	RTEL1-TNFRSF6B	0.0112
IPO8	hsa-let-7b	GAS5	0.0112
KPNA5	hsa-let-7b	SNHG1	0.0112
PPP2R1A	hsa-mir-17	CTD-2587H24.14	0.0112
PPP2R1A	hsa-mir-92a-1	CTD-2587H24.14	0.0112
SRRM2	hsa-mir-18a	CTD-2517M22.14	0.0112
EDC4	hsa-mir-92a-1	CTD-2587H24.14	0.0113
C17orf80	hsa-mir-125a	RP11-158I13.2	0.0114
PSMD7	hsa-mir-30e	SNHG16	0.0114
DHX9	hsa-mir-25	MALAT1	0.0115
MMS22L	hsa-let-7b	GAS5	0.0117
TMEM242	hsa-mir-30e	SNHG16	0.0117
TNFSF12	hsa-mir-17	INO80B-WBP1	0.0117
FAM210A	hsa-mir-185	SCARNA9	0.0118
GATAD2B	hsa-mir-92a-1	CTD-2587H24.14	0.0118
MIDN	hsa-mir-20a	INO80B-WBP1	0.0118
MIDN	hsa-mir-17	INO80B-WBP1	0.0118
NFIC	hsa-mir-2110	RTEL1-TNFRSF6B	0.0118
NAA15	hsa-let-7b	SNHG1	0.0119
C3orf38	hsa-mir-106b	CTB-89H12.4	0.012
PSMA3	hsa-mir-106b	CTB-89H12.4	0.012
LRRC40	hsa-let-7b	SNHG1	0.0121
MLLT1	hsa-mir-17	INO80B-WBP1	0.0121
MLLT1	hsa-mir-20a	INO80B-WBP1	0.0121
TRIOBP	hsa-mir-20a	INO80B-WBP1	0.0121
TRIOBP	hsa-mir-17	INO80B-WBP1	0.0121
DICER1	hsa-let-7a-3	CTB-89H12.4	0.0122
NIPBL	hsa-let-7a-3	SNHG16	0.0122
OSCAR	hsa-mir-186	RP11-793H13.8	0.0122
RRP15	hsa-mir-4793	SNHG5	0.0122
TAF9	hsa-let-7b	GAS5	0.0122
ZBTB7A	hsa-mir-20a	INO80B-WBP1	0.0122
ZBTB7A	hsa-mir-17	INO80B-WBP1	0.0122
SUMO1	hsa-let-7a-3	SNHG16	0.0123
TAPBP	hsa-mir-18a	CTD-2517M22.14	0.0123
USP47	hsa-let-7b	GAS5	0.0123
ZC3H11A	hsa-let-7b	SNHG1	0.0123
AMD1	hsa-let-7a-3	SNHG16	0.0124
GOLGA4	hsa-let-7a-3	SNHG16	0.0125
NAA35	hsa-let-7a-3	SNHG16	0.0125
LSM6	hsa-let-7b	GAS5	0.0126
STK40	hsa-mir-18a	CTD-2517M22.14	0.0126
STX7	hsa-mir-4793	SNHG5	0.0126
ACAP2	hsa-mir-4793	SNHG5	0.0127
ERGIC2	hsa-let-7b	SNHG1	0.0127
GOLGA4	hsa-let-7b	SNHG1	0.0127
KIAA1143	hsa-let-7a-3	SNHG16	0.0127
RBM34	hsa-let-7b	SNHG1	0.0127
TCOF1	hsa-mir-92a-1	CTD-2587H24.14	0.0127
ARID1A	hsa-mir-18a	CTD-2517M22.14	0.0128
RAN	hsa-mir-106b	CTB-89H12.4	0.0128
YTHDC1	hsa-let-7b	SNHG1	0.0128
ANP32E	hsa-let-7b	SNHG1	0.0129
ZBTB4	hsa-mir-17	CTD-2587H24.14	0.0129
ZC3H3	hsa-mir-18a	CTD-2517M22.14	0.0129
ZNF644	hsa-let-7b	SNHG1	0.0129
AHCTF1	hsa-let-7b	SNHG1	0.0131
MARK2	hsa-mir-2110	ADAMTSL4-AS1	0.0131
SLC29A1	hsa-mir-186	RP11-793H13.8	0.0133
MARK2	hsa-mir-2110	RTEL1-TNFRSF6B	0.0135
PRIM2	hsa-let-7b	SNHG1	0.0137
SETD5	hsa-mir-132	AC012307.3	0.0137
RPS3A	hsa-let-7a-3	SNHG16	0.0138
COPS2	hsa-let-7b	SNHG1	0.0139
TNF	hsa-mir-17	CTD-2587H24.14	0.0139
WDR33	hsa-let-7b	SNHG1	0.0139
ORC4	hsa-let-7b	SNHG1	0.0142
USP37	hsa-mir-185	SCARNA9	0.0142
AGO2	hsa-mir-132	AC012307.3	0.0143
GABPB1	hsa-let-7b	SNHG1	0.0143
SHOC2	hsa-let-7a-3	SNHG16	0.0143
CPTP	hsa-mir-92a-1	CTD-2587H24.14	0.0146
FOPNL	hsa-mir-4793	SNHG5	0.0146
HMGB1	hsa-let-7b	GAS5	0.0146
BMI1	hsa-mir-30e	SNHG16	0.0149
CNOT2	hsa-let-7b	SNHG1	0.0149
PSME3	hsa-mir-92a-1	HCP5	0.0149
TSPYL1	hsa-mir-30e	SNHG16	0.0149
IGF1R	hsa-mir-125b-1	RP11-29G8.3	0.015
PGM3	hsa-let-7b	SNHG1	0.015
NAP1L1	hsa-let-7a-3	SNHG16	0.0153
PRRC2A	hsa-mir-18a	CTD-2517M22.14	0.0153
AZIN1	hsa-mir-30e	SNHG5	0.0155
DDX18	hsa-let-7b	SNHG1	0.0155
GABPB1	hsa-mir-106b	CTB-89H12.4	0.0155
HNRNPDL	hsa-let-7a-3	SNHG16	0.0155
PSMD7	hsa-mir-30e	EPB41L4A-AS1	0.0155
SGMS1	hsa-let-7b	SNHG1	0.0155
VPS26A	hsa-mir-106b	CTB-89H12.4	0.0155
TMEM242	hsa-mir-30e	EPB41L4A-AS1	0.0157
NUFIP2	hsa-mir-25	MALAT1	0.0158
TUBB	hsa-mir-92a-1	CTD-2587H24.14	0.0158
USP47	hsa-let-7a-3	SNHG16	0.0158
MED12	hsa-mir-17	CTD-2587H24.14	0.016
PDE12	hsa-let-7b	SNHG1	0.016
SETD5	hsa-mir-132	ZFP91-CNTF	0.016
SLC25A44	hsa-mir-92a-1	RP11-400F19.8	0.0161
BZW1	hsa-let-7b	SNHG1	0.0165
RPL9	hsa-let-7a-3	SNHG16	0.0165
SYF2	hsa-let-7a-3	SNHG16	0.0165
TNPO1	hsa-mir-23a	NPHP3-ACAD11	0.0165
ITPR2	hsa-mir-4793	SNHG5	0.0166
HBP1	hsa-let-7a-3	SNHG16	0.0169
AK2	hsa-mir-125a	RP11-158I13.2	0.017
BAG6	hsa-mir-92a-1	CTD-2587H24.14	0.017
ZBTB7B	hsa-mir-18a	RP11-44N21.4	0.017
ASCC3	hsa-let-7b	GAS5	0.0172
CRTC2	hsa-mir-92a-1	RP11-400F19.8	0.0172
HNRNPA3	hsa-mir-4793	SNHG5	0.0172
MIB1	hsa-let-7a-3	SNHG16	0.0172
YIPF4	hsa-mir-4793	SNHG5	0.0172
HNRNPU	hsa-let-7a-3	CTB-89H12.4	0.0174
HNRNPU	hsa-let-7a-3	SNHG16	0.0176
ATG4C	hsa-let-7a-3	CTB-89H12.4	0.0178
CBX3	hsa-mir-30e	SNHG16	0.0178
FITM2	hsa-mir-23b	NPHP3-ACAD11	0.0178
RNF123	hsa-mir-92a-1	CTD-2587H24.14	0.0178
APPL1	hsa-let-7b	CTB-89H12.4	0.0181
PBX2	hsa-mir-92a-1	RP11-400F19.8	0.0181
TMUB1	hsa-mir-92a-1	RP11-400F19.8	0.0181
TOR2A	hsa-mir-2110	SENP3-EIF4A1	0.0181
C11orf24	hsa-mir-92a-1	RP11-400F19.8	0.0183
KMT2B	hsa-mir-17	CTD-2587H24.14	0.0183
TOR2A	hsa-mir-2110	MIRLET7BHG	0.0183
ACTL6A	hsa-mir-25	MALAT1	0.0184
BTLA	hsa-mir-23b	NPHP3-ACAD11	0.0184
GTF3C2	hsa-mir-92a-1	RP11-400F19.8	0.0184
KPNA6	hsa-let-7a-1	HCP5	0.0184
PPP1R12C	hsa-mir-92a-1	RP11-400F19.8	0.0184
TNRC18	hsa-mir-92a-1	RP11-400F19.8	0.0184
GTPBP2	hsa-mir-2110	RP11-44M6.7	0.0185
SLC4A2	hsa-mir-92a-1	RP11-400F19.8	0.0185
CYLD	hsa-mir-197	SNHG1	0.0187
HMGB1	hsa-let-7b	SNHG1	0.0187
ICA1L	hsa-mir-197	SNHG1	0.0187
MLF2	hsa-mir-92a-1	CTD-2587H24.14	0.0187
PPP1CA	hsa-mir-17	CTD-2587H24.14	0.0192
HCFC1	hsa-mir-92a-1	RP11-400F19.8	0.0194
KIAA0895L	hsa-mir-2110	RP11-44M6.7	0.0194
LRRC40	hsa-let-7b	CTB-89H12.4	0.0194
LRRC58	hsa-mir-197	CTC-559E9.4	0.0194
POLL	hsa-let-7f-1	XXbac-BPG300A18.13	0.0194
OXR1	hsa-let-7b	CTB-89H12.4	0.02
MAP3K14	hsa-mir-34a	EMC3-AS1	0.0201
TOR1AIP2	hsa-let-7b	CTB-89H12.4	0.0202
COX1	hsa-let-7a-3	GAS5	0.0203
COX2	hsa-let-7a-3	GAS5	0.0204
RPL9	hsa-mir-25	MALAT1	0.0204
NIPBL	hsa-let-7b	CTB-89H12.4	0.0206
MTOR	hsa-mir-125a	RP11-66N24.4	0.0207
BMI1	hsa-mir-30e	EPB41L4A-AS1	0.021
RNF44	hsa-mir-92a-1	RP11-400F19.8	0.021
GANAB	hsa-mir-92a-1	RP11-400F19.8	0.0212
AMD1	hsa-let-7a-3	GAS5	0.0214
APOBEC3F	hsa-mir-92a-1	RP11-400F19.8	0.0214
ATP13A1	hsa-mir-92a-1	RP11-400F19.8	0.0214
CASP2	hsa-mir-20a	HCP5	0.0214
CASP2	hsa-mir-17	HCP5	0.0214
CHD1	hsa-let-7b	CTB-89H12.4	0.0214
ERGIC2	hsa-let-7b	CTB-89H12.4	0.0214
FASN	hsa-mir-92a-1	RP11-400F19.8	0.0214
GALNT1	hsa-mir-30e	SNHG16	0.0214
GOLGA4	hsa-let-7a-3	GAS5	0.0214
HAT1	hsa-let-7a-3	CTB-89H12.4	0.0214
MARK2	hsa-mir-92a-1	RP11-400F19.8	0.0214
PIGS	hsa-mir-92a-1	RP11-400F19.8	0.0214
PLEKHA3	hsa-let-7b	CTB-89H12.4	0.0214
RBM34	hsa-let-7b	CTB-89H12.4	0.0214
RNMT	hsa-let-7b	CTB-89H12.4	0.0214
RTCA	hsa-let-7b	SNHG1	0.0214
SRCAP	hsa-mir-2110	SENP3-EIF4A1	0.0214
TROVE2	hsa-let-7b	CTB-89H12.4	0.0214
UBA1	hsa-mir-17	CTD-2587H24.14	0.0214
KLF2	hsa-mir-92a-1	RP11-400F19.8	0.0215
NAA35	hsa-let-7a-3	GAS5	0.0215
PPP1CC	hsa-mir-223	GAS5	0.0215
SKI	hsa-mir-2110	SENP3-EIF4A1	0.0215
SRCAP	hsa-mir-2110	RP11-44M6.7	0.0215
YTHDC1	hsa-let-7b	CTB-89H12.4	0.0215
YTHDC1	hsa-mir-30e	SNHG16	0.0215
ANP32E	hsa-let-7b	CTB-89H12.4	0.0216
SKI	hsa-mir-2110	RTEL1-TNFRSF6B	0.0216
ZNF644	hsa-let-7a-3	GAS5	0.0216
MAST3	hsa-mir-92a-1	RP11-400F19.8	0.0218
NFATC2IP	hsa-mir-92a-1	RP11-400F19.8	0.0218
PLEKHO2	hsa-mir-17	CTD-2587H24.14	0.0218
RFX1	hsa-mir-92a-1	RP11-400F19.8	0.0218
TWF1	hsa-mir-30e	SNHG16	0.0218
KIAA1143	hsa-let-7b	CTB-89H12.4	0.0219
KIAA1143	hsa-let-7a-3	GAS5	0.0219
PRIM2	hsa-let-7b	CTB-89H12.4	0.0219
CFL1	hsa-mir-2110	RTEL1-TNFRSF6B	0.0221
CIC	hsa-mir-92a-1	RP11-400F19.8	0.0221
RAVER1	hsa-mir-92a-1	RP11-400F19.8	0.0221
AMMECR1L	hsa-mir-191	ZFP91-CNTF	0.0223
CAMTA2	hsa-mir-92a-1	RP11-400F19.8	0.0223
COPS2	hsa-let-7b	CTB-89H12.4	0.0223
CRY2	hsa-mir-17	CTD-2587H24.14	0.0223
IQSEC1	hsa-mir-92a-1	RP11-400F19.8	0.0223
KLC2	hsa-mir-92a-1	CTD-2587H24.14	0.0223
MTDH	hsa-mir-30e	SNHG16	0.0223
SP2	hsa-mir-17	LOC100506472	0.0223
TPP1	hsa-mir-2110	RP11-44M6.7	0.0223
DHTKD1	hsa-mir-125a	RP11-158I13.2	0.0224
GABPB1	hsa-let-7b	CTB-89H12.4	0.0224
HNRNPK	hsa-mir-106b	CTB-89H12.4	0.0224
RPS3A	hsa-let-7a-3	GAS5	0.0224
VAT1	hsa-mir-2110	RP11-197N18.2	0.0224
CORO7	hsa-mir-92a-1	RP11-400F19.8	0.0226
DSTYK	hsa-mir-23b	NPHP3-ACAD11	0.0227
R3HDM4	hsa-mir-92a-1	RP11-400F19.8	0.0227
IPO8	hsa-let-7b	CTB-89H12.4	0.0228
SHOC2	hsa-let-7a-3	GAS5	0.0228
TSC2	hsa-mir-17	CTD-2587H24.14	0.0228
CPTP	hsa-mir-92a-1	RP11-400F19.8	0.0229
ALDH3B1	hsa-mir-2110	RP11-44M6.7	0.023
BRD4	hsa-mir-2110	RTEL1-TNFRSF6B	0.023
TPP1	hsa-mir-2110	RTEL1-TNFRSF6B	0.023
ATXN2L	hsa-mir-92a-1	RP11-400F19.8	0.0231
IRAK1	hsa-mir-92a-1	CTD-2587H24.14	0.0231
IRAK1	hsa-mir-17	CTD-2587H24.14	0.0231
LSM14A	hsa-mir-30e	SNHG16	0.0231
SLC25A44	hsa-mir-17	LOC100506472	0.0231
ZNF629	hsa-mir-92a-1	CTD-2587H24.14	0.0231
RPAP1	hsa-mir-18a	CTD-2517M22.14	0.0236
CBX3	hsa-mir-30e	EPB41L4A-AS1	0.0237
DEDD2	hsa-mir-92a-1	CTD-2587H24.14	0.0237
FICD	hsa-mir-17	CTD-2587H24.14	0.0237
HGH1	hsa-mir-92a-1	CTD-2587H24.14	0.0237
TESK1	hsa-mir-92a-1	RP11-400F19.8	0.0237
VAT1	hsa-mir-2110	ADAMTSL4-AS1	0.0237
NAP1L1	hsa-let-7a-3	GAS5	0.0238
PHC3	hsa-mir-197	SNHG1	0.0239
RPAP1	hsa-mir-92a-1	CTD-2587H24.14	0.0239
YIPF4	hsa-mir-197	CTC-559E9.4	0.024
SKI	hsa-mir-2110	RP11-44M6.7	0.0242
ZNF267	hsa-mir-25	RP11-618G20.1	0.0242
RIOK2	hsa-let-7b	CTB-89H12.4	0.0246
HNRNPDL	hsa-let-7a-3	GAS5	0.0248
IFIT5	hsa-mir-106b	CTB-89H12.4	0.0248
PIP5K1C	hsa-mir-92a-1	RP11-400F19.8	0.0248
TAF9	hsa-let-7b	CTB-89H12.4	0.0248
TNKS2	hsa-mir-30e	SNHG16	0.0248
USP47	hsa-let-7b	CTB-89H12.4	0.0248
USP47	hsa-let-7a-3	GAS5	0.0248
ZNF708	hsa-mir-197	SNHG1	0.0248
DENND4B	hsa-mir-92a-1	RP11-400F19.8	0.0251
RPS8	hsa-mir-30e	SNHG16	0.0253
NUP210	hsa-mir-92a-1	CTD-2587H24.14	0.0254
TET3	hsa-mir-2110	RP11-44M6.7	0.0256
CNBP	hsa-let-7a-3	GAS5	0.0257
ELMSAN1	hsa-mir-17	LOC100506472	0.0257
SYF2	hsa-let-7b	CTB-89H12.4	0.0257
ZNF446	hsa-mir-17	LOC100506472	0.0257
LSM6	hsa-let-7b	CTB-89H12.4	0.0259
SKI	hsa-mir-2110	MIRLET7BHG	0.0259
TET3	hsa-mir-2110	RP11-197N18.2	0.0259
RPL9	hsa-let-7a-3	GAS5	0.026
HBP1	hsa-let-7b	CTB-89H12.4	0.0265
VPS41	hsa-mir-30e	SNHG16	0.0265
LRRC40	hsa-let-7b	SNHG16	0.0266
STAU1	hsa-mir-132	AC012307.3	0.0266
ACBD5	hsa-mir-223	GAS5	0.0268
MIB1	hsa-let-7a-3	GAS5	0.0268
VPS35	hsa-mir-25	RP11-618G20.1	0.0268
ARL8B	hsa-let-7a-3	CTB-89H12.4	0.027
MKNK2	hsa-mir-17	LOC100506472	0.027
PTP4A1	hsa-mir-30e	SNHG16	0.027
RRP15	hsa-mir-4793	MALAT1	0.027
TBC1D1	hsa-mir-125a	TMX2-CTNND1	0.027
NOLC1	hsa-let-7a-1	HCP5	0.0272
KDM6B	hsa-mir-17	LOC100506472	0.0273
RLIM	hsa-mir-25	RP11-618G20.1	0.0275
CAPN15	hsa-mir-17	LOC100506472	0.0276
YTHDC1	hsa-mir-30e	EPB41L4A-AS1	0.0276
ARPP19	hsa-mir-30e	SNHG16	0.0277
C7orf43	hsa-mir-17	LOC100506472	0.0277
NIPBL	hsa-let-7b	SNHG16	0.0277
LIMK1	hsa-mir-17	LOC100506472	0.0278
HMGB1	hsa-let-7b	CTB-89H12.4	0.0279
NAP1L1	hsa-mir-30e	SNHG16	0.0281
RBM34	hsa-let-7b	SNHG16	0.0282
TNF	hsa-mir-17	LOC100506472	0.0282
GANAB	hsa-mir-17	LOC100506472	0.0283
GOLGA4	hsa-let-7b	SNHG16	0.0283
PIGS	hsa-mir-17	LOC100506472	0.0283
RNMT	hsa-let-7b	SNHG16	0.0283
ACAP2	hsa-mir-4793	MALAT1	0.0284
CHD1	hsa-let-7b	SNHG16	0.0284
FICD	hsa-mir-17	LOC100506472	0.0286
YTHDC1	hsa-let-7b	SNHG16	0.0286
ANP32E	hsa-let-7b	SNHG16	0.0289
MTDH	hsa-mir-30e	EPB41L4A-AS1	0.0289
UNK	hsa-mir-17	LOC100506472	0.0289
RHOC	hsa-mir-2110	RTEL1-TNFRSF6B	0.029
SERINC1	hsa-mir-223	GAS5	0.0291
DDX6	hsa-mir-221	RP11-227G15.3	0.0292
MARK2	hsa-mir-17	LOC100506472	0.0292
AHCTF1	hsa-let-7b	SNHG16	0.0293
ARPP19	hsa-let-7b	SNHG16	0.0293
ZNF805	hsa-let-7b	MALAT1	0.0293
FOXJ2	hsa-mir-17	LOC100506472	0.0294
KDELR1	hsa-mir-17	LOC100506472	0.0294
KIAA1143	hsa-let-7b	SNHG16	0.0294
LRRC41	hsa-mir-18a	CTD-2517M22.14	0.0294
OXR1	hsa-mir-106b	CTB-89H12.4	0.0294
TOR1AIP2	hsa-let-7a-3	CTB-89H12.4	0.0294
TMEM165	hsa-let-7a-3	CTB-89H12.4	0.0296
MTOR	hsa-mir-125a	RP11-158I13.2	0.0297
WDR33	hsa-let-7b	SNHG16	0.0299
CHD1	hsa-mir-30e	SNHG16	0.03
COPS2	hsa-let-7b	SNHG16	0.03
IREB2	hsa-mir-30e	SNHG16	0.03
MAVS	hsa-mir-17	LOC100506472	0.03
TBPL1	hsa-mir-30e	SNHG16	0.03
GABPB1	hsa-let-7b	SNHG16	0.0304
USO1	hsa-let-7b	CTB-89H12.4	0.0304
BRWD1	hsa-mir-221	RP11-227G15.3	0.0305
CASP2	hsa-mir-17	CTD-2587H24.14	0.0305
LSM14A	hsa-mir-30e	EPB41L4A-AS1	0.0305
NCOR2	hsa-mir-2110	ADAMTSL4-AS1	0.0305
PARP1	hsa-mir-223	GAS5	0.0305
SARS2	hsa-mir-92a-1	CTD-2587H24.14	0.0305
SRSF7	hsa-mir-30e	SNHG16	0.0305
TMEM127	hsa-mir-17	LOC100506472	0.0305
TMEM189-UBE2V1	hsa-mir-2110	FLJ23867	0.0305
TMEM189	hsa-mir-2110	FLJ23867	0.0305
TNFSF12	hsa-mir-17	LOC100506472	0.0305
UBE2V1	hsa-mir-2110	FLJ23867	0.0305
HNRNPU	hsa-mir-30e	SNHG16	0.0308
CDKN1B	hsa-mir-30e	SNHG16	0.0309
TMEM189-UBE2V1	hsa-mir-2110	SENP3-EIF4A1	0.0309
TMEM189	hsa-mir-2110	SENP3-EIF4A1	0.0309
UBE2V1	hsa-mir-2110	SENP3-EIF4A1	0.0309
ZNF644	hsa-let-7a-3	CTB-89H12.4	0.0309
MIDN	hsa-mir-17	LOC100506472	0.0311
ZBED3	hsa-mir-17	LOC100506472	0.0311
CDV3	hsa-let-7b	CTB-89H12.4	0.0313
HIC2	hsa-mir-2110	SENP3-EIF4A1	0.0313
PPP2R1A	hsa-mir-17	LOC100506472	0.0316
SFT2D3	hsa-let-7a-3	CTB-89H12.4	0.0316
DNM1L	hsa-mir-106b	CTB-89H12.4	0.0318
NACC1	hsa-mir-18a	CTD-2517M22.14	0.0318
NKIRAS2	hsa-mir-2110	FLJ23867	0.0318
POLL	hsa-let-7f-1	AC135048.13	0.0318
SRCAP	hsa-mir-2110	FLJ23867	0.0318
SUGT1	hsa-mir-4793	MALAT1	0.0318
ZBTB7A	hsa-mir-17	LOC100506472	0.032
DVL3	hsa-mir-17	LOC100506472	0.0322
GOLGA4	hsa-let-7b	MALAT1	0.0322
HLX	hsa-mir-2110	FLJ23867	0.0322
PLEKHA3	hsa-let-7b	MALAT1	0.0322
RPS8	hsa-mir-30e	EPB41L4A-AS1	0.0322
SHOC2	hsa-let-7a-3	CTB-89H12.4	0.0322
TNKS2	hsa-mir-30e	EPB41L4A-AS1	0.0322
CHD1	hsa-let-7b	MALAT1	0.0323
TPP1	hsa-mir-2110	FLJ23867	0.0323
PNRC2	hsa-mir-221	RP11-227G15.3	0.0324
ZNF644	hsa-let-7b	MALAT1	0.0327
ZNF417	hsa-let-7b	MALAT1	0.0328
ZNF770	hsa-mir-106b	CTB-89H12.4	0.0331
USP47	hsa-let-7b	SNHG16	0.0333
CIC	hsa-mir-92a-1	CTD-2587H24.14	0.0335
KMT2D	hsa-mir-18a	CTD-2517M22.14	0.0338
ZNF738	hsa-let-7b	MALAT1	0.0338
IFNAR1	hsa-mir-106b	CTB-89H12.4	0.034
FAM3A	hsa-mir-92a-1	CTD-2587H24.14	0.0341
HSPA1B	hsa-mir-92a-1	CTD-2587H24.14	0.0341
SRCAP	hsa-mir-2110	RTEL1-TNFRSF6B	0.0341
SYF2	hsa-let-7b	SNHG16	0.0341
TP53	hsa-mir-17	LOC100506472	0.0341
ALDH3B1	hsa-mir-2110	FLJ23867	0.0343
SPOPL	hsa-mir-106b	CTB-89H12.4	0.0343
TSC2	hsa-mir-17	LOC100506472	0.0343
TUBB	hsa-mir-18a	CTD-2517M22.14	0.0343
HBP1	hsa-let-7b	SNHG16	0.0349
IPO8	hsa-let-7b	MALAT1	0.0349
NACC1	hsa-mir-17	LOC100506472	0.0349
ZNF354B	hsa-mir-205	RP11-67A1.2	0.0353
IPO9	hsa-let-7a-1	HCP5	0.0354
SH3GLB1	hsa-mir-106b	CTB-89H12.4	0.0354
TMCC1	hsa-mir-26a-1	TMX2-CTNND1	0.0354
CASP2	hsa-mir-17	LOC100506472	0.0356
MAP3K2	hsa-mir-106b	CTB-89H12.4	0.0356
MAT2A	hsa-mir-21	HCP5	0.0356
NAP1L1	hsa-mir-30e	EPB41L4A-AS1	0.0356
CDK8	hsa-mir-195	C1QTNF3-AMACR	0.0358
UBAP2L	hsa-let-7a-1	HCP5	0.0358
XPO1	hsa-mir-30e	SNHG16	0.0358
PAK4	hsa-mir-18a	CTD-2517M22.14	0.0359
PIGS	hsa-mir-92a-1	CTD-2587H24.14	0.0359
PIGS	hsa-mir-17	CTD-2587H24.14	0.0359
ZDHHC24	hsa-mir-92a-1	CTD-2587H24.14	0.0361
DNTTIP2	hsa-mir-25	MALAT1	0.0362
HMGB1	hsa-let-7b	SNHG16	0.0365
COX1	hsa-let-7a-3	MALAT1	0.0367
TET3	hsa-mir-2110	FLJ23867	0.0367
TET3	hsa-mir-2110	MIRLET7BHG	0.0367
UQCRB	hsa-mir-197	SNHG1	0.0367
COX2	hsa-let-7a-3	MALAT1	0.0368
ISG20L2	hsa-mir-18a	CTD-2517M22.14	0.0368
MAPK8	hsa-mir-30e	SNHG16	0.0368
MBNL1	hsa-mir-30e	SNHG16	0.0368
TBPL1	hsa-mir-30e	EPB41L4A-AS1	0.0368
AGO1	hsa-mir-320c-1	ZFP91-CNTF	0.0369
BZW1	hsa-let-7b	MALAT1	0.0369
CCDC77	hsa-mir-30c-2	RP11-158I13.2	0.0369
MON1B	hsa-mir-18a	CTD-2517M22.14	0.0369
PSMA6	hsa-mir-30e	EPB41L4A-AS1	0.0369
USP47	hsa-let-7b	MALAT1	0.0369
TRAPPC1	hsa-mir-18a	CTD-2517M22.14	0.037
COL3A1	hsa-mir-29b-2	CSNK1G2-AS1	0.0371
SRSF7	hsa-mir-30e	EPB41L4A-AS1	0.0371
ZNF703	hsa-mir-2110	MIRLET7BHG	0.0371
AMD1	hsa-let-7a-3	MALAT1	0.0373
GOLGA4	hsa-let-7a-3	MALAT1	0.0374
CCNT2	hsa-let-7a-3	MALAT1	0.0375
NAA35	hsa-let-7a-3	MALAT1	0.0375
POLL	hsa-let-7f-1	RP11-264B17.3	0.0375
ZNF644	hsa-let-7a-3	MALAT1	0.0378
LSM6	hsa-let-7b	MALAT1	0.038
MTAP	hsa-mir-125a	CDKN2B-AS1	0.0382
RIF1	hsa-mir-30e	SNHG16	0.0382
TET3	hsa-mir-2110	SENP3-EIF4A1	0.0382
MAT2B	hsa-mir-106b	CTB-89H12.4	0.0383
NAA20	hsa-let-7a-3	CTB-89H12.4	0.0383
PYROXD1	hsa-mir-30e	GAS5	0.0383
WDR77	hsa-mir-125a	RP11-158I13.2	0.0383
CFL1	hsa-mir-2110	FLJ23867	0.0384
RBM41	hsa-mir-197	JPX	0.0385
TBC1D15	hsa-mir-25	MALAT1	0.0386
RPS3A	hsa-let-7a-3	MALAT1	0.0388
LDHB	hsa-mir-197	MALAT1	0.0389
ROCK2	hsa-mir-30e	SNHG16	0.0389
SYVN1	hsa-let-7a-1	AC135048.13	0.039
BZW1	hsa-mir-197	MALAT1	0.0391
STAU1	hsa-mir-132	ZFP91-CNTF	0.0391
ATG5	hsa-mir-30e	SNHG16	0.0393
DPM2	hsa-mir-125a	RP11-158I13.2	0.0393
HNRNPA1	hsa-mir-197	MALAT1	0.0393
KPNA1	hsa-mir-132	AC012307.3	0.0393
RPL30	hsa-let-7a-1	HCP5	0.0393
SHOC2	hsa-let-7a-3	MALAT1	0.0393
R3HDM4	hsa-mir-28	CTD-2587H24.14	0.0395
RPS15A	hsa-let-7a-3	MALAT1	0.0395
HMGB1	hsa-let-7b	MALAT1	0.0396
ALMS1	hsa-mir-197	SNHG1	0.0397
SGTB	hsa-mir-106b	CTB-89H12.4	0.0397
DNAJB9	hsa-mir-25	MALAT1	0.0398
STRN	hsa-mir-30e	SNHG16	0.0402
UBN2	hsa-mir-150	STAG3L5P-PVRIG2P-PILRB	0.0402
NFYA	hsa-mir-150	STAG3L5P-PVRIG2P-PILRB	0.0407
ATL2	hsa-mir-221	GAS5	0.0408
E4F1	hsa-mir-92a-1	CTD-2587H24.14	0.0411
ZNF92	hsa-mir-148a	TUG1	0.0411
HMGB1	hsa-mir-106b	CTB-89H12.4	0.0412
NAP1L1	hsa-let-7a-3	MALAT1	0.0412
ACAP2	hsa-mir-106b	CTB-89H12.4	0.0413
LSAMP	hsa-mir-29b-2	CSNK1G2-AS1	0.0413
NAA35	hsa-let-7a-3	CTB-89H12.4	0.0413
NFIC	hsa-mir-18a	CTD-2517M22.14	0.0413
SH3GL1	hsa-mir-2110	RTEL1-TNFRSF6B	0.0413
BNIP2	hsa-mir-106b	MALAT1	0.0417
HNRNPDL	hsa-let-7a-3	MALAT1	0.0417
ZNF776	hsa-mir-125a	RP11-158I13.2	0.0417
HNRNPUL1	hsa-let-7a-1	AC135048.13	0.0418
PDCD4	hsa-mir-197	SNHG1	0.0422
USO1	hsa-let-7b	MALAT1	0.0424
DDX6	hsa-mir-221	GAS5	0.0428
STAU1	hsa-mir-132	TMX2-CTNND1	0.0428
TNKS2	hsa-mir-221	GAS5	0.0428
USP47	hsa-let-7a-3	MALAT1	0.0428
XPO1	hsa-mir-30e	EPB41L4A-AS1	0.0428
TOPORS	hsa-mir-106b	MALAT1	0.043
CDV3	hsa-let-7b	MALAT1	0.0438
NKIRAS2	hsa-mir-2110	MIRLET7BHG	0.0438
RPL9	hsa-let-7a-3	MALAT1	0.0438
CSDE1	hsa-mir-106b	CTB-89H12.4	0.044
ASCC1	hsa-mir-195	C1QTNF3-AMACR	0.0442
GOLGA4	hsa-let-7a-3	CTB-89H12.4	0.0443
HOOK3	hsa-mir-106b	CTB-89H12.4	0.0443
KLHL15	hsa-mir-15a	NCBP2-AS2	0.0444
ZNF776	hsa-mir-125a	CDKN2B-AS1	0.0444
TNRC6B	hsa-mir-26a-1	SPECC1L-ADORA2A	0.0446
POLL	hsa-let-7f-1	RP11-44M6.7	0.0447
PRPS1	hsa-mir-671	MALAT1	0.0447
CREM	hsa-mir-30e	EPB41L4A-AS1	0.0448
ISY1	hsa-mir-671	MALAT1	0.0448
MIB1	hsa-let-7a-3	MALAT1	0.0448
RBBP7	hsa-mir-30e	EPB41L4A-AS1	0.0448
TRIM23	hsa-mir-30e	EPB41L4A-AS1	0.0448
CFL1	hsa-mir-2110	MIRLET7BHG	0.0452
CS	hsa-let-7a-1	AC135048.13	0.0452
HNRNPU	hsa-let-7a-3	MALAT1	0.0455
CEP72	hsa-mir-17	CTD-2587H24.14	0.0456
KPNA5	hsa-mir-197	SNHG1	0.0456
RBBP6	hsa-mir-195	RP11-96D1.10	0.0456
GOLT1B	hsa-mir-106b	MALAT1	0.0457
ADAM15	hsa-mir-18a	CTD-2517M22.14	0.0458
IQSEC1	hsa-mir-92a-1	CTD-2587H24.14	0.0458
IQSEC1	hsa-mir-17	CTD-2587H24.14	0.0458
PYROXD1	hsa-mir-30e	MALAT1	0.0459
PELP1	hsa-mir-92a-1	CTD-2587H24.14	0.046
SERINC1	hsa-mir-106b	CTB-89H12.4	0.046
ZNF609	hsa-let-7a-1	AC135048.13	0.046
TRIM37	hsa-mir-30e	SNHG16	0.0461
SLC38A7	hsa-let-7a-1	AC135048.13	0.0462
USP3	hsa-mir-106b	CTB-89H12.4	0.0462
TCEANC2	hsa-mir-150	STAG3L5P-PVRIG2P-PILRB	0.0463
TRIM41	hsa-mir-423	CHKB-CPT1B	0.0463
DDX6	hsa-mir-221	MALAT1	0.0467
ROCK2	hsa-mir-30e	EPB41L4A-AS1	0.0468
TMEM189-UBE2V1	hsa-mir-2110	MIRLET7BHG	0.0468
TMEM189	hsa-mir-2110	MIRLET7BHG	0.0468
UBE2V1	hsa-mir-2110	MIRLET7BHG	0.0468
AKAP17A	hsa-let-7a-1	AC135048.13	0.047
TBL1XR1	hsa-mir-106b	MALAT1	0.047
NOL6	hsa-mir-18a	CTD-2517M22.14	0.0473
MIB1	hsa-mir-30e	SNHG16	0.0475
CSNK1A1	hsa-mir-106b	CTB-89H12.4	0.0476
TNKS2	hsa-mir-106b	CTB-89H12.4	0.0476
WDR82	hsa-mir-30e	SNHG16	0.0478
CIC	hsa-mir-18a	CTD-2517M22.14	0.0479
POLE	hsa-mir-92a-1	CTD-2587H24.14	0.0479
SF3A1	hsa-let-7a-1	AC135048.13	0.0479
ZNF3	hsa-mir-218-2	RP11-212P7.3	0.0479
IRF2BP2	hsa-let-7a-1	AC135048.13	0.048
USP35	hsa-let-7a-1	AC135048.13	0.048
CDV3	hsa-let-7a-3	MALAT1	0.0481
TRAF7	hsa-let-7a-1	AC135048.13	0.0482
LAPTM4A	hsa-mir-106b	CTB-89H12.4	0.0483
CYCS	hsa-mir-106b	CTB-89H12.4	0.0485
RBM39	hsa-mir-221	RP11-108M9.3	0.0488
PLXND1	hsa-let-7a-1	AC135048.13	0.0489
IL6R	hsa-let-7a-1	AC135048.13	0.049
UBE2Q2	hsa-mir-106b	CTB-89H12.4	0.049
AZIN1	hsa-mir-30e	CTB-89H12.4	0.0492
ORAI2	hsa-let-7a-1	AC135048.13	0.0492
MIDN	hsa-let-7a-1	AC135048.13	0.0496
RBM39	hsa-mir-221	GAS5	0.0499
